# Supplementary material for: Effects of midwinter snowmelt on runoff generation andgroundwater recharge in the Canadian prairies
Source: Copernicus journal article supplement (doi:10.5194/hess-2018-423), 2018-08-13
Supplement: Supplementary file 1 [file hess-2018-423-supplement.zip]

## Sheet: Fig. 3a - Daily temperature
Date	Spyhill	Stauffer	Triple G		Average daily temperatures, degrees Celsius
2015-11-01	2.25715	0.108438	2.86542
2015-11-02	-1.14191	0.379354	0.52643
2015-11-03	-3.3942	-2.96265	0.75393
2015-11-04	-1.95739	-1.89756	-0.616799
2015-11-05	-0.240883	-0.629796	-0.0330832
2015-11-06	1.35159	0.794729	1.10694
2015-11-07	8.53373	8.86138	9.74051
2015-11-08	1.2398	-0.110229	2.18116
2015-11-09	-2.43939	-1.20579	-0.733863
2015-11-10	-3.10577	-5.2366	-4.23376
2015-11-11	1.33005	0.309042	0.448
2015-11-12	-0.133151	-0.498563	-0.111772
2015-11-13	2.7292	3.39656	5.92057
2015-11-14	-0.723465	0.292563	0.714051
2015-11-15	2.27933	-0.633188	0.251562
2015-11-16	-2.51726	-2.16135	-1.81111
2015-11-17	0.802796	0.792396	2.61699
2015-11-18	-5.50065	-5.75871	-5.00198
2015-11-19	-6.77193	-8.52815	-7.01552
2015-11-20	-8.19145	-7.94383	-7.84756
2015-11-21	1.27239	1.12352	0.831631
2015-11-22	3.41229	0.414	2.83637
2015-11-23	-4.07552	-3.49388	-2.59413
2015-11-24	-9.83144	-9.44783	-7.60065
2015-11-25	-10.0989	-13.1061	-12.367
2015-11-26	-5.49632	-11.2847	-8.99268
2015-11-27	-0.367706	-3.38927	-0.789363
2015-11-28	0.996383	-5.07144	-3.57513
2015-11-29	1.77348	-4.6531	-2.40292
2015-11-30	0.820379	-5.06435	-2.89896
2015-12-01	1.8057	-5.10931	-1.12682
2015-12-02	3.3274	0.184396	-0.227601
2015-12-03	3.04502	0.0312917	2.50227
2015-12-04	3.16775	2.05012	4.68262
2015-12-05	0.441422	0.776583	2.57382
2015-12-06	2.08851	3.06767	5.02462
2015-12-07	2.92494	4.06365	5.50741
2015-12-08	3.30079	0.844708	4.26017
2015-12-09	1.01406	0.147583	4.06356
2015-12-10	-2.90843	-4.72771
2015-12-11	-3.42622	-3.60892
2015-12-12	-6.35666	-5.42627
2015-12-13	-6.03553	-5.63537
2015-12-14	-8.33606	-8.74085
2015-12-15	-5.00313	-13.3824
2015-12-16	-8.80282	-9.08173
2015-12-17	-12.7571	-13.7442	-13.4528
2015-12-18	-12.7066	-15.149	-14.2819
2015-12-19	-4.44729	-16.0877	-15.7237
2015-12-20	-2.96368	-5.18823	-5.7139
2015-12-21	-5.79642	-9.3444	-5.77743
2015-12-22	-8.70927	-12.8796	-12.4718
2015-12-23	-10.5881	-14.3279	-14.9541
2015-12-24	-14.4589	-14.4856	-15.9765
2015-12-25	-17.6387	-20.8771	-18.3048
2015-12-26	-12.8923	-17.1183
2015-12-27	-2.55034	-13.6122	-8.43454
2015-12-28	-7.66097	-8.77248	-10.4784
2015-12-29	-11.4296	-16.3919	-15.6121
2015-12-30	-9.21215	-13.5901	-10.8419
2015-12-31	-3.74654	-8.5279	-5.15154
2016-01-01	-0.830108	-5.90508	-1.62582
2016-01-02	-3.12687	-9.2025	-7.48056
2016-01-03	-3.70596	-14.5	-8.55335
2016-01-04	-3.92778	-7.88271	-5.52995
2016-01-05	-9.15426	-12.691	-11.7709
2016-01-06	-11.513	-16.1798	-14.8032
2016-01-07	-11.8712	-11.6258	-11.139
2016-01-08	-15.7225	-15.9573	-17.0934
2016-01-09	-10.7301	-20.7406	-20.654
2016-01-10	-5.08942	-6.39179	-4.79916
2016-01-11	-4.54869	-4.23369	-4.25877
2016-01-12	0.785155	-7.30142	-3.08671
2016-01-13	2.84497	-3.4505	-1.06274
2016-01-14	-2.10453	-2.0906	-1.4626
2016-01-15	-11.4308	-13.4369	-12.9907
2016-01-16	-15.0275	-17.8906	-18.0537
2016-01-17	-15.0364	-18.5585	-19.3099
2016-01-18	-0.166432	-9.83765	-8.60002
2016-01-19	-0.668428	-9.69202	-5.85332
2016-01-20	-6.16952	-14.3875	-14.6732
2016-01-21	-1.67183	-10.4847	-7.67859
2016-01-22	5.19028	-1.36252	4.19703
2016-01-23	0.585081	-5.75231	-2.18546
2016-01-24	-3.53651	-3.81733	-2.03278
2016-01-25	-2.63885	-9.99496	-7.05577
2016-01-26	5.25218	-2.63592	2.17645
2016-01-27	5.99622	-0.835596	4.02878
2016-01-28	6.76794	6.33852	6.75347
2016-01-29	1.10058	-0.272125	1.91528
2016-01-30	-0.098161	-3.1875	0.0980305
2016-01-31	-3.01326	-2.78358	-1.95295
2016-02-01	-4.71103	-5.3236	-4.33024
2016-02-02	-5.50816	-6.96065	-5.64729
2016-02-03	-6.00731	-10.2519	-7.65651
2016-02-04	-0.371424	-7.79992	-5.05499
2016-02-05	3.8891	-2.13071	2.09604
2016-02-06	1.91359	1.95981	3.1362
2016-02-07	-1.21843	-3.49481	-1.44035
2016-02-08	6.70439	-1.29004	2.87428
2016-02-09	10.0331	2.04596	7.35603
2016-02-10	1.61294	-1.12967	1.00264
2016-02-11	1.12841	0.411312	1.47516
2016-02-12	-3.14004	-4.45821	-2.97607
2016-02-13	2.48251	-1.04023	3.29146
2016-02-14	3.21687	0.928021	2.74335
2016-02-15	2.36726	0.94725	2.39089
2016-02-16	2.47428	-0.279187	1.55348
2016-02-17	0.91839	-1.7696	2.22616
2016-02-18	4.41981	-0.527792	2.53223
2016-02-19	2.52842	-2.34269	-1.12948
2016-02-20	-3.43118	-7.95185	-8.12109
2016-02-21	0.242991	-3.85335	-2.20113
2016-02-22	0.594485	-4.20113	-2.22724
2016-02-23	-1.2327	-3.24062	-1.98062
2016-02-24	-3.73968	-5.70362	-4.61828
2016-02-25	3.72689	-1.8169	-0.99892
2016-02-26	8.92921	0.469396	4.83374
2016-02-27	3.67523	2.91902	4.03329
2016-02-28	0.595114	-2.82702	0.333067
2016-02-29	-6.39489	-9.93156	-8.70822
2016-03-01	-0.492048	-3.99696	-0.94359
2016-03-02	-1.64046	-0.817458	0.396161
2016-03-03	2.40252	-0.603604	4.33404
2016-03-04	2.82386	-0.607	1.5551
2016-03-05	5.64497	6.554	7.45435
2016-03-06	3.53839	0.960812	3.52974
2016-03-07	4.32407	0.431646	2.98775
2016-03-08	2.25694	-0.0195	-0.262891
2016-03-09	1.27801	0.287458	2.2057
2016-03-10	4.1689	4.36181	6.03469
2016-03-11	5.41193	5.99531	6.31018
2016-03-12	5.9565	6.01671	7.51616
2016-03-13	2.75027	4.1789	4.65716
2016-03-14	-0.0731181	-0.620521	0.0754464
2016-03-15	-0.89147	-0.0237708	0.391692
2016-03-16	0.66438	1.51137	1.86657
2016-03-17	-3.28569	-2.30975	-3.11754
2016-03-18	-3.5948	-2.38927	-3.20524
2016-03-19	0.436326	0.224896	0.886591
2016-03-20	6.99523	3.26604	3.84327
2016-03-21	-0.291335	-1.62467	0.10812
2016-03-22	-2.38971	-4.6475	-4.29971
2016-03-23	1.20364	0.056	1.41314
2016-03-24	3.31416	1.31998	3.95554
2016-03-25	-0.526125	1.33885	1.79178
2016-03-26	2.95659	3.42431	3.4095
2016-03-27	3.70415	3.40365	4.36573
2016-03-28	3.26652	3.86394	3.02214
2016-03-29	4.92087	5.2346	4.62435
2016-03-30	7.01828	7.20071	8.44406
2016-03-31	3.81615	4.73521	4.80257
2016-04-01	11.1008	9.35083	10.1339
2016-04-02	12.3538	11.8462	13.334
2016-04-03	8.73072	8.0024	8.76364
2016-04-04	6.78719	5.7909	8.03176
2016-04-05	6.05261	7.05917	8.23279
2016-04-06	9.09312	8.59931	9.63029
2016-04-07	7.54862	7.14656	7.33448
2016-04-08	11.4343	10.1212	11.826
2016-04-09	8.12038	8.13571	9.77162
2016-04-10	1.26955	1.11996	0.713457
2016-04-11	6.6339	5.35604	5.82728
2016-04-12	9.08835	9.70483	11.1917
2016-04-13	8.76793	9.54008	10.4312
2016-04-14	3.18504	5.39094	6.79088
2016-04-15	5.65878	6.49408	5.94198
2016-04-16	9.23242	8.67613	8.57771
2016-04-17	11.9779	11.3556	12.5276
2016-04-18	13.5683	12.8207	13.0119
2016-04-19	18.0075	15.3283	15.9459
2016-04-20	12.0929	11.9008	12.5846
2016-04-21	11.7369	9.79713	11.8719
2016-04-22	6.16581	7.76681	8.92497
2016-04-23	1.72491	1.85798	3.29978
2016-04-24	1.74097	1.53685	2.24079
2016-04-25	2.54086	2.10383	5.98225
2016-04-26	4.55465	5.49029	5.60177
2016-04-27	5.17784	6.09129	5.1089
2016-04-28	4.57842	6.45254	6.66407
2016-04-29	6.15661	7.34875	6.78936
2016-04-30	6.97276	8.94735	9.34061

## Sheet: Fig. 3b - Daily temperature
Date	Spyhill	Stauffer	Triple G	Fort Macleod		Average daily temperatures, degrees Celsius
2016-11-01	0.969846	0.906667		6.00373
2016-11-02	6.16697	4.08608		9.34115
2016-11-03	10.4175	10.4089		11.8526
2016-11-04	9.84098	8.35275		12.5543
2016-11-05	11.5847	14.1988		13.259
2016-11-06	6.51832	5.78002		9.62858
2016-11-07	5.64641	3.15287		8.26488
2016-11-08	13.8603	15.4017	16.2763	14.8443
2016-11-09	11.1801	11.0974	13.2488	14.579
2016-11-10	4.82769	3.92525	5.27295	4.86499
2016-11-11	10.1899	5.04662	9.18261	11.9474
2016-11-12	9.60108	7.12481	11.9588	11.0308
2016-11-13	7.93436	6.33708	8.26969	9.80682
2016-11-14	5.40363	4.87969	6.82561	8.15708
2016-11-15	-0.181501	-2.1974	0.449345	3.83482
2016-11-16	-3.00419	-1.00146	0.0522641	-0.345122
2016-11-17	-4.58072	-3.83419	-2.68822	-1.37628
2016-11-18	-5.48485	-4.23883	-3.70125	-4.58897
2016-11-19	-5.24335	-4.01946	-3.81533	-1.49406
2016-11-20	-1.07589	-3.60156	-4.24184	4.02117
2016-11-21	4.05472	-4.5486	-0.887575	4.78071
2016-11-22	-0.651392	-5.15156	-5.5203	0.956102
2016-11-23	-1.6201	-5.39133	#DIV/0!	1.79596
2016-11-24	1.18064	-2.03456	0.444642	2.84984
2016-11-25	1.59695	1.1154	2.98033	4.89531
2016-11-26	0.0187479	-3.39865	2.50155	1.8214
2016-11-27	0.46256	-4.56398	-4.13115	0.425103
2016-11-28	-2.45431	-3.501	-3.75002	-2.69354
2016-11-29	-3.73381	-4.7354	-4.69751	-2.36609
2016-11-30	-8.31768	-8.3269		-3.33094
2016-12-01	-2.35774	-5.03798		-1.79925
2016-12-02	-2.70312	-8.1109	-0.859284	-1.71219
2016-12-03	0.569712	-1.56729	0.204656	2.55025
2016-12-04	-6.90218	-5.78733	-4.63325	-2.69492
2016-12-05	-16.9024	-17.0579	-15.9223	-13.3214
2016-12-06	-21.3112	-21.0994	-20.4734	-21.8057
2016-12-07	-23.3042	-22.8535	-22.0482	-25.0532
2016-12-08	-25.0991	-23.0506	-22.576	-25.9788
2016-12-09	-23.7583	-23.8983	-22.1115	-21.3741
2016-12-10	-22.6825	-23.526	-21.8206	-21.5873
2016-12-11	-21.7496	-22.1225	-21.5098	-21.3166
2016-12-12	-15.9497	-14.6477	-15.2967	-16.6595
2016-12-13	-13.7814	-12.5635	-12.9739	-22.3317
2016-12-14	-13.7136	-16.3083	-14.2019	-20.6533
2016-12-15	-18.6159	-19.2567	-18.7481	-16.7665
2016-12-16	-22.0336	-22.751	-22.8392	-22.2497
2016-12-17	-14.84	-19.6056	-16.7953	-17.1961
2016-12-18	-4.65651	-4.46102	-3.97373	-7.16891
2016-12-19	-1.9261	-1.49794	-1.04816	-2.15631
2016-12-20	-1.81371	-3.49979	-0.989674	0.506481
2016-12-21	0.157295	-1.55429	0.00582419	0.764833
2016-12-22	1.74198	0.466583	1.92007	1.89793
2016-12-23	-7.18295	-6.10656	-6.17262	-5.13796
2016-12-24	-12.7321	-12.5832	-12.0706	-10.109
2016-12-25	-17.523	-20.7302	-20.1545	-19.0544
2016-12-26	-7.8466	-24.1727	-17.5016	-13.203
2016-12-27	-2.25666	-3.52431	-2.96487	-2.21689
2016-12-28	-3.27322	-5.0689	-3.91161	-2.21748
2016-12-29	-4.34414	-8.58875	-5.81974	-1.26981
2016-12-30	-5.74675	-7.4631	-6.71674	-5.22937
2016-12-31	-5.51701	-5.5699	-5.13499	-3.53662
2017-01-01	-14.0308	-12.5892	-12.1838	-11.3477
2017-01-02	-20.2825	-21.6702	-23.1254	-18.4584
2017-01-03	-19.6946	-22.2717	-21.9193	-22.1386
2017-01-04	-11.8527	-11.9925	-13.2389	-16.7888
2017-01-05	-8.28806	-9.87946	-8.99029	-11.8619
2017-01-06	-15.0031	-16.4575	-15.5995	-12.663
2017-01-07	-18.4976	-17.2981	-17.2664	-17.3143
2017-01-08	-19.58	-21.406	-20.3204	-17.7194
2017-01-09	-22.4253	-21.666	-22.6924	-21.0779
2017-01-10	-21.3222	-21.0983	-20.5243	-22.4855
2017-01-11	-15.2703	-13.3045	-14.7466	-22.7434
2017-01-12	-12.6531	-18.8527	-19.17	-15.4447
2017-01-13	-5.46957	-14.4146	-9.53425	-7.29658
2017-01-14	-0.920034	-12.1636	-4.64018	-4.61376
2017-01-15	2.33443	-1.57398	1.38657	-1.8059
2017-01-16	2.86536	-3.95225	-2.21041	-1.91006
2017-01-17	7.81267	5.9959	5.69109	5.45986
2017-01-18	5.31413	5.01058	5.92786	7.1059
2017-01-19	4.50077	4.25202	4.28466	5.3033
2017-01-20	0.15145	-1.40783	1.05851	1.61842
2017-01-21	-4.0956	-5.73262	-6.14963	-4.67991
2017-01-22	-6.68347	-6.99673		-4.18494
2017-01-23	-6.34883	-7.49317		-5.43821
2017-01-24	-5.39669	-6.54569		-5.78267
2017-01-25	-3.40278	-6.26552	-6.16713	-5.13712
2017-01-26	-2.7155	-3.81921	-2.78758	-3.50893
2017-01-27	1.13031	-2.41706	0.723948	0.272106
2017-01-28	6.14819	2.85429	5.97687	4.89205
2017-01-29	7.01096	5.02931	7.89665	6.72036
2017-01-30	-2.06467	-2.26027	-0.610881	1.5097
2017-01-31	-10.1354	-9.79158	-9.43058	-6.93618
2017-02-01	-11.5125	-10.0904	-10.1616	-10.265
2017-02-02	-12.3535	-12.2838	-11.1154	-12.8207
2017-02-03	-15.6753	-16.8637	-15.2381	-13.9666
2017-02-04	-17.4499	-15.9031	-15.218	-14.6577
2017-02-05	-18.5274	-18.0515	-16.8339	-15.8521
2017-02-06	-23.6884	-22.1508	-21.6185	-20.123
2017-02-07	-25.1954	-25.8452	-26.6045	-25.0985
2017-02-08	-19.044	-23.0588	-22.1793	-24.081
2017-02-09	-7.7965	-17.5677	-15.7324	-5.4239
2017-02-10	-5.68573	-14.2742	-13.2993	3.58629
2017-02-11	-2.65539	-3.67621	-3.00116	0.383175
2017-02-12	1.29987	-0.375771	-0.296531	1.95999
2017-02-13	5.01333	1.23179	1.64793	3.79338
2017-02-14	6.70821	0.408229	3.55285	5.24075
2017-02-15	8.12133	7.60871	6.33237	9.46601
2017-02-16	6.77793	6.70202	8.19167	8.61067
2017-02-17	4.2045	3.75375	4.81413	4.98719
2017-02-18	-2.10957	-0.591521	1.06212	-1.41794
2017-02-19	-2.58953	-0.441062	1.71402	2.22497
2017-02-20	-3.50434	-1.46121	-0.297313	2.68241
2017-02-21	-3.80799	-1.70396	-1.07003	-1.82468
2017-02-22	-5.304	-3.51498	-2.47476	-1.89283
2017-02-23	-7.1799	-6.531	-5.20796	-5.76596
2017-02-24	-10.1248	-8.60446	-8.01897	-9.09378
2017-02-25	-9.11485	-9.66215	-8.07289	-5.78281
2017-02-26	-11.7784	-11.3803	-10.7844	-8.07668
2017-02-27	-14.1364	-14.604	-12.9995	-11.7341
2017-02-28	-11.6199	-12.4188	-10.6789	-10.803
2017-03-01	-6.68404	-8.84929	-5.97694	-2.64667
2017-03-02	-5.1478	-7.74415	-4.94662	-1.92222
2017-03-03	1.86408	-0.61475	2.17826	4.04806
2017-03-04	-9.19472	-9.81171	-7.69573	0.967067
2017-03-05	-13.5545	-14.9612	-12.4892	-9.9898
2017-03-06	-14.0262	-14.714	-14.0065	-13.3812
2017-03-07	-14.5258	-16.0802	-15.2103	-10.2974
2017-03-08	-17.2996	-18.1788	-16.2051	-14.0495
2017-03-09	-20.3615	-20.6319	-20.1175	-19.0475
2017-03-10	-19.9574	-18.4481	-17.9162	-15.7616
2017-03-11	-19.1262	-19.5944	-18.4792	-15.748
2017-03-12	-16.2477	-16.1427	-16.0921	-14.7857
2017-03-13	0.287715	-13.6073	-12.8041	-3.40225
2017-03-14	4.99624	-4.16644	0.210703	7.32885
2017-03-15	5.19974	1.91083	4.04963	10.047
2017-03-16	0.0315902	0.377	0.575929	2.32074
2017-03-17	-0.297673	-0.279896	1.14278	2.21615
2017-03-18	5.92808	3.85956	7.1168	8.37736
2017-03-19	-1.13545	0.426458	0.73572	3.01986
2017-03-20	-3.73853	-3.38306	-2.43002	-2.16149
2017-03-21	-1.47531	-1.74804	-0.500797	2.35498
2017-03-22	6.12512	1.20508	3.42491	8.15813
2017-03-23	3.63414	1.13908	4.30291	6.5175
2017-03-24	2.81797	-0.207646	4.55218	3.3389
2017-03-25	4.82824	4.15771	5.7183	6.14024
2017-03-26	3.31245	2.91215	3.79697	4.85297
2017-03-27	4.84591	4.35525	5.4825	7.20575
2017-03-28	4.78912	5.12067	6.31483	6.39213
2017-03-29	4.99047	5.29688	6.69172	7.09279
2017-03-30	3.97636	2.4055	4.82655	7.27012
2017-03-31	4.50543	5.39283	5.92823	6.68245
2017-04-01	6.96495	6.47967	8.38145	8.42527
2017-04-02	-0.111059	3.08537	3.91812	2.47397
2017-04-03	-0.398867	1.32071	1.49159	1.26631
2017-04-04	2.50169	2.71685	3.06982	2.69404
2017-04-05	7.06395	5.37696	7.20949	8.06638
2017-04-06	9.73855	9.91442	11.9262	10.152
2017-04-07	3.61559	4.20865	6.0868	6.4049
2017-04-08	5.12623	4.02356	5.36148	8.3061
2017-04-09	1.19581	3.15667	3.7464	2.64134
2017-04-10	2.87791	4.4486	4.24714	3.8661
2017-04-11	1.53324	3.03892	3.85498	5.66081
2017-04-12	0.849315	2.21079	3.70385	3.62738
2017-04-13	0.313691	2.28629	6.33832	5.21154
2017-04-14	1.74478	1.66606	4.30448	5.77965
2017-04-15	-1.49154	-1.71138	0.184322	5.47628
2017-04-16	0.168831	-1.92956	-1.15456	2.63682
2017-04-17	2.91362	2.17392	3.13595	5.80551
2017-04-18	3.49682	2.38852	7.17474	8.81554
2017-04-19	5.17166	4.28952	5.50922	8.46307
2017-04-20	7.42709	6.78356	8.78116	8.11086
2017-04-21	3.98244	5.44254	5.72789	5.81167
2017-04-22	3.65039	1.66183	5.4761	5.79913
2017-04-23	2.32897	0.706167	5.62948	6.56537
2017-04-24	-0.192167	1.19585	4.07885	4.71188
2017-04-25	-2.26588	-1.1489	0.0845006	1.99792
2017-04-26	-1.29758	-0.309333	1.2258	2.32818
2017-04-27	-0.574906	1.11027	2.55621	2.9462
2017-04-28		2.65023	2.71215	3.70688
2017-04-29		5.28142	6.11844	6.22919
2017-04-30		6.80706	7.76356	9.31653
2017-05-01		2.60696

## Sheet: Fig. 4a SWE
Date	Site	Line	SWE, mm	Comment				Raw snow depth and density meaurements available at request
2015-11-26	Triple G	Line 1	14.3371	9-100 m of the snow survey line
2015-11-26	Triple G	Line 2	13.0399	9-100 m of the snow survey line
2015-12-10	Triple G	Line 1	6.25848	9-100 m of the snow survey line				Snow survey line coordinates (NAD83 UTM12N)
2015-12-10	Triple G	Line 2	5.49888	9-100 m of the snow survey line				Site	Line	Line start (0 m)		Line end
2015-12-30	Triple G	Line 1	18.3201	9-100 m of the snow survey line						Easting, m	Northing, m	Easting, m	Northing, m
2015-12-30	Triple G	Line 2	17.6693	9-100 m of the snow survey line				Stauffer	SE1	309285	5755591	309289	5755691
2016-01-20	Triple G	Line 1	37.4727	9-100 m of the snow survey line				Stauffer	SE2	308966	5755723	309060	5755693
2016-01-20	Triple G	Line 2	40.3145	9-100 m of the snow survey line				Spyhill	GP	274260	5674338	274249	5674140
2015-12-01	Stauffer	SE2	10.22					Spyhill	GP new line	274257	5674250	274407	5674324
2015-12-15	Stauffer	SE2	16.03					Spyhill	C24	274294	5674937	274410	5674842
2015-12-22	Stauffer	SE2	22.74					Triple G	Line 1	360108	5672531	360074	5672625
2016-01-12	Stauffer	SE2	26.72					Triple G	Line 2	360108	5672531	360020	5672579
2016-01-27	Stauffer	SE2	35.27
2016-02-10	Stauffer	SE2	34.28
2016-02-26	Stauffer	SE2	35.2665
2016-03-09	Stauffer	SE2	27.14
2015-12-01	Stauffer	SE1	9.11
2015-12-15	Stauffer	SE1	21.54
2015-12-22	Stauffer	SE1	25.17
2016-01-12	Stauffer	SE1	26.65
2016-01-27	Stauffer	SE1	30.81
2016-02-10	Stauffer	SE1	18.17
2016-02-26	Stauffer	SE1	17.9333
2016-03-09	Stauffer	SE1	0
2015-11-25	Spyhill	GP	6.2
2015-12-14	Spyhill	GP	12.91
2015-12-31	Spyhill	GP	20.67
2016-01-15	Spyhill	GP	28.07
2015-11-25	Spyhill	GP new line	8.18
2015-12-14	Spyhill	GP new line	7.13
2015-12-31	Spyhill	GP new line	18.96
2016-01-15	Spyhill	GP new line	25.14
2015-11-25	Spyhill	C24	7.61
2015-12-14	Spyhill	C24	3.63
2015-12-31	Spyhill	C24	16.76
2016-01-15	Spyhill	C24	26.73

## Sheet: Fig. 4b SWE
Date	Site	Line	SWE, mm	Comment				Raw snow depth and density meaurements available at request
2017-01-10	Triple G	Line 1	25.9375	9-100 m of the snow survey line
2017-01-10	Triple G	Line 1	28.188	9-100 m of the snow survey line
2017-02-09	Triple G	Line 1	21.6542	9-100 m of the snow survey line				Snow survey line coordinates (NAD83 UTM12N)
2017-02-09	Triple G	Line 1	25.3277	9-100 m of the snow survey line				Site	Line	Line start (0 m)		Line end
2017-02-28	Triple G	Line 1	5.45478	9-100 m of the snow survey line						Easting, m	Northing, m	Easting, m	Northing, m
2017-02-28	Triple G	Line 1	4.96525	9-100 m of the snow survey line				Stauffer	SE1	309285	5755591	309289	5755691
2017-01-10	Triple G	Line 2	24.806	9-100 m of the snow survey line				Stauffer	SE2	308966	5755723	309060	5755693
2017-01-10	Triple G	Line 2	27.0253	9-100 m of the snow survey line				Spyhill	GP	274260	5674338	274249	5674140
2017-02-09	Triple G	Line 2	21.0198	9-100 m of the snow survey line				Spyhill	GP new line	274257	5674250	274407	5674324
2017-02-09	Triple G	Line 2	24.6343	9-100 m of the snow survey line				Spyhill	C24	274294	5674937	274410	5674842
2017-02-28	Triple G	Line 2	5.38956	9-100 m of the snow survey line				Triple G	Line 1	360108	5672531	360074	5672625
2017-02-28	Triple G	Line 2	4.95018	9-100 m of the snow survey line				Triple G	Line 2	360108	5672531	360020	5672579
2016-12-07	Stauffer	SE2	6.92871					Fort Macleod		328720	5517530	328730	5517430
2017-01-04	Stauffer	SE2	27.4217
2017-01-25	Stauffer	SE2	21.4453
2017-02-13	Stauffer	SE2	36.6549
2017-03-03	Stauffer	SE2	14.9777
2016-12-07	Stauffer	SE1	9.74158
2017-01-04	Stauffer	SE1	25.6196
2017-01-25	Stauffer	SE1	19.9253
2017-02-13	Stauffer	SE1	36.7408
2017-03-03	Stauffer	SE1	11.1615
2017-01-05	Fort Macleod		15.3634
2017-01-18	Fort Macleod		8.75235
2017-02-09	Fort Macleod		15.777
2016-12-09	Spyhill	GP	5.85115
2017-01-06	Spyhill	GP	19.5663
2017-02-10	Spyhill	GP	24.5969
2017-03-10	Spyhill	GP	9.74485
2016-12-09	Spyhill	GP new line	7.13471
2017-01-06	Spyhill	GP new line	20.886
2017-02-10	Spyhill	GP new line	26.1879
2017-03-10	Spyhill	GP new line	9.74485
2016-12-09	Spyhill	C24	7.95992
2017-01-06	Spyhill	C24	29.5873
2017-02-10	Spyhill	C24	24.0347
2017-03-10	Spyhill	C24	12.4544

## Sheet:  Fig. 6a heat flux
	Spyhill	Stauffer	Triple G			Daily average sensible heat flux
2015-11-01	13.7795	4.71899	-1.07429			Positive = downwards
2015-11-02	-0.702556	-3.17844	-1.21836			Empty cell or 0 = No data
2015-11-03	16.3732	-0.893271	-2.01229			Watts per square metres
2015-11-04	27.5499	-15.6999	-10.5676
2015-11-05	20.4385	3.82482	7.20146
2015-11-06	13.341	-11.8381	1.90814
2015-11-07	31.5928	12.218	31.905
2015-11-08	-4.91015	3.09524	3.34866
2015-11-09	-2.87827	-1.39285	-0.0450536
2015-11-10	14.0628	-5.6361	2.6298
2015-11-11	38.9221	2.58831	24.0965
2015-11-12	34.1865	1.65708	20.7533
2015-11-13	11.7333	7.86756	17.4917
2015-11-14	-0.140544	1.2659	-1.58052
2015-11-15	0.729705	-9.32508	6.70049
2015-11-16	2.1695	-0.244252	5.64017
2015-11-17	12.1709	9.71156	16.85
2015-11-18	17.7368	12.4677	9.69193
2015-11-19	18.7035	-4.8222	15.3497
2015-11-20	13.9538	7.11109	10.7952
2015-11-21	65.0907	3.48067	35.4176
2015-11-22	45.9767	-8.26307	20.2417
2015-11-23	-4.90923	-3.36218	2.58592
2015-11-24	0.968515	4.4791	2.76806
2015-11-25	23.7491	8.36961	12.8476
2015-11-26	30.9378	0.314625	15.5111
2015-11-27	47.5383	15.1658	33.375
2015-11-28	39.83	6.73857	3.66898
2015-11-29	32.0343	12.0687	0.992576
2015-11-30	22.6695	2.11453	2.02636
2015-12-01	63.7424	-1.2445	13.1478
2015-12-02	45.7184	8.89823	25.4488
2015-12-03	28.2261	18.7142	53.8917
2015-12-04	34.8156	21.9278	39.5548
2015-12-05	35.1932	27.4157	34.1453
2015-12-06	25.4147	28.1008	40.373
2015-12-07	22.3774	33.087	33.9393
2015-12-08	31.11	14.4185	25.9611
2015-12-09	10.6599	3.88457	0
2015-12-10	10.5072	-4.92208	0
2015-12-11	-1.82046	-0.488371	0
2015-12-12	4.95586	-2.5847	0
2015-12-13	0.974687	0	0
2015-12-14	-0.466102	0	0
2015-12-15	28.6448	0	0
2015-12-16	13.2801	20.0155	0
2015-12-17	12.6785	11.1344	0
2015-12-18	10.1175	-4.90346	-1.5896
2015-12-19	28.6244	0.544172	9.6461
2015-12-20	37.2015	23.5855	31.189
2015-12-21	19.6745	-0.344579	23.8784
2015-12-22	16.6619	12.1611	1.41034
2015-12-23	15.4603	10.6058	6.9525
2015-12-24	1.6747	5.0068	0.258575
2015-12-25	17.4087	3.21902	0
2015-12-26	25.9	0	0
2015-12-27	47.3019	-2.553	0
2015-12-28	2.88217	3.13222	0.581603
2015-12-29	7.09697	0	0
2015-12-30	40.1365	0	0
2015-12-31	60.5952	-0.870769	40.81
2016-01-01	61.596	4.83208	52.4332
2016-01-02	23.2035	8.95147	11.2458
2016-01-03	19.9916	3.81047	31.7143
2016-01-04	19.389	12.0339	7.07717
2016-01-05	6.32977	1.64842	3.93419
2016-01-06	1.65886	2.094	0
2016-01-07	-2.51199	-1.1218	0.938655
2016-01-08	4.6959	-3.00468	0
2016-01-09	39.5965	0	0
2016-01-10	35.5709	14.889	27.5274
2016-01-11	13.0997	5.01527	5.54328
2016-01-12	61.0515	-2.20538	0
2016-01-13	42.2133	12.159	15.7786
2016-01-14	8.11062	13.2275	4.65035
2016-01-15	-4.72239	-0.411175	-0.400129
2016-01-16	-3.42862	-5.54551	-9.83829
2016-01-17	-1.7464	-6.1445	-9.73624
2016-01-18	36.6194	-3.37659	6.52258
2016-01-19	29.4352	2.19069	5.47111
2016-01-20	7.31909	0.495943	0.533284
2016-01-21	15.7862	3.71187	57.6911
2016-01-22	28.6936	5.88034	49.968
2016-01-23	24.8332	8.54867	4.93664
2016-01-24	1.71676	-0.440714	8.27063
2016-01-25	26.8592	-4.7578	5.00112
2016-01-26	78.106	18.5735	50.3247
2016-01-27	75.0388	-0.0912079	39.4376
2016-01-28	45.164	58.0848	64.0625
2016-01-29	20.7015	13.9992	13.384
2016-01-30	17.3522	17.172	8.61739
2016-01-31	-8.29585	8.61419	4.59835
2016-02-01	-0.888028	-3.57362	1.1778
2016-02-02	6.67547	-2.95644	-1.4905
2016-02-03	7.59124	5.83554	9.30868
2016-02-04	13.1762	-3.30293	4.27307
2016-02-05	46.1311	28.2493	48.8131
2016-02-06	29.0695	59.1451	34.7416
2016-02-07	18.0146	5.63889	14.4092
2016-02-08	33.105	-3.64349	6.53314
2016-02-09	52.7961	-2.67504	14.5623
2016-02-10	5.112		0
2016-02-11	-9.12907	0	0
2016-02-12		0	0
2016-02-13	18.2297	0	0
2016-02-14	3.51078	9.00735	7.97169
2016-02-15	-2.6068	2.58858	-0.453807
2016-02-16	-4.42919	-1.13408	4.83226
2016-02-17	-0.833683	-9.68349	3.78761
2016-02-18	10.3331	-5.73615	8.25771
2016-02-19	-2.57922	6.19277	0
2016-02-20	-13.6489	-5.05202	-0.948931
2016-02-21	-11.0114	3.20924	10.933
2016-02-22	-0.0664863	15.6676	18.5952
2016-02-23	0.757619	2.73842	11.298
2016-02-24	-17.5721	-0.831921	16.2175
2016-02-25	-3.35431	0.161058	18.2003
2016-02-26	22.5584	-7.97627	42.3932
2016-02-27	2.94752	20.7786	21.8315
2016-02-28	29.488	-7.92845	4.1956
2016-02-29	-27.7688	-24.6146	-31.8862
2016-03-01	-1.92606	-15.9043	0
2016-03-02	-21.0016	-7.71953	-5.84577
2016-03-03	-23.3132	-18.1541	0
2016-03-04	-16.0392	-5.99251	2.03775
2016-03-05	-4.621	10.5621	18.9519
2016-03-06	-3.37693	-3.42917	2.29548
2016-03-07	-11.8804	-12.2203	-16.1533
2016-03-08	-17.926	-15.7879	0
2016-03-09	-26.9541	-15.4291	0
2016-03-10	-32.036	-5.53653	-10.0988
2016-03-11	-10.9493	-6.40744	7.20773
2016-03-12	-10.3053	-14.5177	0.912121
2016-03-13	-36.3188	-22.2684	-31.8514
2016-03-14	-30.8078	-7.30573	-11.9509
2016-03-15	-15.0331	-17.1521	-6.10189
2016-03-16	-0.418915	-15.922	2.1472
2016-03-17	-8.57405	-17.9305	-11.9586
2016-03-18	-30.6438	-38.8004	-35.8097
2016-03-19	-30.6018	-34.672	-28.1327
2016-03-20	-24.9845	-17.7375	-19.8036
2016-03-21	-43.7352	-6.45165	-16.2239
2016-03-22	-40.9253	-10.1372	-18.5747
2016-03-23	-46.1776	-27.6313	-43.4612
2016-03-24	-23.5293	-10.8459	-17.8493
2016-03-25	-10.438	-37.9644	-30.8813
2016-03-26	-26.5023	-30.091	-27.8014
2016-03-27	-23.3979	-36.4114	-28.6534
2016-03-28	-34.0751	-27.7014	-29.2812
2016-03-29	-48.0805	-40.8617	-28.8098
2016-03-30	-10.9378	-17.1425	-5.41135
2016-03-31	-22.2839	-42.476	-29.7247
2016-04-01	-43.4187	-40.6336	-14.3314
2016-04-02	-19.2304	-27.2914	-18.4064
2016-04-03	-40.5466	-37.9621	-37.761
2016-04-04	-7.52594	-16.5817	-12.5376
2016-04-05	-33.9574	-39.7712	-28.9183
2016-04-06	-34.2941	-32.4571	-8.42841
2016-04-07	-51.8722	-44.204	-43.017
2016-04-08	-15.633	-16.5238	-19.6759
2016-04-09	-47.872	-33.2103	-9.76513
2016-04-10	-47.2769	-46.1034	-40.2451
2016-04-11	-33.8871	-37.6349	-50.2147
2016-04-12	-18.2834	-26.143	-32.5583
2016-04-13	-44.4842	-27.2188	-25.4733
2016-04-14	-26.7621	-27.161	-19.7777
2016-04-15	-56.4949	-54.8487	-44.457
2016-04-16	-49.3997	-48.4672	-33.1097
2016-04-17	-54.2364	-41.939	-36.1407
2016-04-18	-35.7578	-40.3259	-30.9845
2016-04-19	-43.1227	-27.6646	-33.291
2016-04-20	-46.8819	-25.4889	-27.1142
2016-04-21	-46.8442	-43.0636	-43.948
2016-04-22	-48.8294	-23.2799	-28.6254
2016-04-23	-20.9459	0	-7.80842
2016-04-24	-29.829	0	-15.4392
2016-04-25	-27.357	-15.9259	0
2016-04-26	-34.4518	-38.6227	0
2016-04-27	-77.6388	-63.1394	0
2016-04-28	-49.8712	-54.9771	-68.516
2016-04-29	-49.2774	-52.7024	-36.3694
2016-04-30	-28.8863	-25.9192	-20.5521

## Sheet:  Fig. 6b heat flux
	SpyGill	Stauffer	Triple G			Daily average latent heat flux
2015-11-01		-4.07472	23.6207			Positive = downwards
2015-11-02		-4.21461	5.9137			Empty cell or 0 = No data
2015-11-03		-5.48371	-3.73327			Watts per square metres
2015-11-04			-6.60367
2015-11-05	-17.4933	-6.4301	-7.4945
2015-11-06	-10.443	-9.39992	-15.6397
2015-11-07	-14.1841
2015-11-08	-7.80207		-4.88299
2015-11-09			-14.3944
2015-11-10
2015-11-11		-8.97123	-21.3731
2015-11-12	-28.0748	-9.97362	-15.2703
2015-11-13	-14.2397	-4.41992	-7.61617
2015-11-14	-7.59685	-2.165	-4.913
2015-11-15	-7.56501	-5.00187	26.4037
2015-11-16			-0.427351
2015-11-17	-12.0315
2015-11-18	-10.0692
2015-11-19	-6.50334	-8.75677	-5.86158
2015-11-20	-4.74345	-4.68241	-4.97066
2015-11-21	-3.94193	-6.78397	-22.696
2015-11-22	-38.382	-3.53064	-6.49849
2015-11-23			-6.33817
2015-11-24	-2.65826		-4.3828
2015-11-25	-0.0251096	-2.5619	1.33797
2015-11-26			-1.33602
2015-11-27	-4.68524	-2.98634	-6.45478
2015-11-28	-11.3647	-1.46702	-0.207751
2015-11-29	-8.66075	-6.15043	-0.0625342
2015-11-30	-7.59344	-1.597	-1.08078
2015-12-01	-5.17454	-5.88465	-2.10698
2015-12-02	-26.0734	-8.54999	-7.92575
2015-12-03	-15.818	-4.43651	-7.02216
2015-12-04	-5.0904	-2.50434	-9.90127
2015-12-05	-6.12841	-10.5123	-14.2598
2015-12-06	-8.96631	-9.58969	-8.15629
2015-12-07	-6.53567	-11.5089	-8.92979
2015-12-08	-7.29405	-3.1562	-3.8037
2015-12-09	-2.67553
2015-12-10
2015-12-11
2015-12-12	-1.80633
2015-12-13
2015-12-14
2015-12-15
2015-12-16		-0.259112
2015-12-17		-1.86457
2015-12-18			3.47045
2015-12-19			7.25761
2015-12-20	-0.145988	10.8906	-1.66526
2015-12-21	-12.5762	0.419383	-2.06638
2015-12-22	-2.2229	1.1285	1.93278
2015-12-23	-0.861047	0.0294435	6.7477
2015-12-24	1.68781		2.36872
2015-12-25	-2.02417	0.973142
2015-12-26
2015-12-27		-2.42263
2015-12-28	-15.5717	-1.05676	-2.92117
2015-12-29	-1.83096
2015-12-30
2015-12-31	1.86296	-2.79282	-8.23489
2016-01-01	-13.6782	-0.565234	-15.4874
2016-01-02	-11.8563	0.000524262	-1.90422
2016-01-03	-2.30343	0.0914892	-2.40774
2016-01-04	-0.880217	-2.14862	0.469154
2016-01-05	-3.18185	-1.51985	0.817511
2016-01-06	0.781357
2016-01-07	-2.12605	-0.903296	-9.62031
2016-01-08	-1.88355
2016-01-09
2016-01-10		-2.35467	-3.58739
2016-01-11	-7.95479	-3.52605	-3.87782
2016-01-12	6.17928	-1.17867
2016-01-13		0.710167	-0.193378
2016-01-14	-17.8871	-3.22549	6.00787
2016-01-15		-2.54458	1.21571
2016-01-16		-1.959	-5.65122
2016-01-17		-2.43592	-5.80513
2016-01-18			1.69032
2016-01-19			1.80186
2016-01-20	-11.0747	0.682945
2016-01-21		-0.225651
2016-01-22		-3.95643	-5.57552
2016-01-23			-3.83609
2016-01-24	-6.74595		0.536504
2016-01-25			-1.68531
2016-01-26		-7.87876	-11.2425
2016-01-27	-27.4601		-15.1022
2016-01-28	-32.9044	-5.4035	-21.1481
2016-01-29	-16.2135	-7.40903	-18.7503
2016-01-30	-15.7174	-7.30919	-10.5222
2016-01-31	-16.6584	-0.190963	8.17126
2016-02-01	-5.43259	-9.19035	-2.57199
2016-02-02	-3.73403	-12.4395	9.20448
2016-02-03	-5.2872		0.522474
2016-02-04	-7.9534	-4.67777	-2.53687
2016-02-05	-15.5549	-10.781	-23.5531
2016-02-06	-10.6128	-44.471	-18.0216
2016-02-07	-17.5202	-5.11468	-13.9969
2016-02-08	-7.84289	-3.91428	-6.86974
2016-02-09	-9.27924	-3.40339
2016-02-10	-15.0965
2016-02-11
2016-02-12
2016-02-13
2016-02-14	-9.98192	-12.6457	-13.0678
2016-02-15	-11.3701	-15.0042
2016-02-16	-10.1956	-14.0955	-16.5465
2016-02-17	-6.48657	-10.1577	-13.6044
2016-02-18	-3.29063		2.0836
2016-02-19
2016-02-20	-11.1949	-4.89091	-2.05222
2016-02-21		-4.10551	5.56799
2016-02-22	-8.8631	-10.6006	3.71025
2016-02-23	-6.27134	-5.6516	-1.61685
2016-02-24	-6.78484	-6.88087	-5.33316
2016-02-25	-4.63245	-5.45569	-2.26077
2016-02-26		-6.87561	-17.073
2016-02-27	-7.74253	-13.173
2016-02-28		-19.9446	-17.7338
2016-02-29	-31.7206		-20.251
2016-03-01
2016-03-02	-8.33503		-20.317
2016-03-03
2016-03-04	-6.44845
2016-03-05	-6.19863	-23.9269	-22.5551
2016-03-06	-5.53048		-14.4532
2016-03-07	-3.88191
2016-03-08	-6.38885
2016-03-09	-6.77891
2016-03-10	-8.61847	-36.581	-35.3385
2016-03-11	-6.41619	-29.0095	-28.7016
2016-03-12	-7.91921	-16.28	-17.6652
2016-03-13	-2.75737		-24.5388
2016-03-14	-7.59509	-14.3979	0.0531035
2016-03-15	-2.24146		20.6025
2016-03-16		-35.2234	1.71611
2016-03-17	-30.6397	-17.7116	0.667472
2016-03-18	-23.055	-16.603	-29.9587
2016-03-19	-18.7539	-19.9545	-15.2682
2016-03-20	-9.22857	-14.0314	-10.7329
2016-03-21	-8.46877		-18.9244
2016-03-22	-1.31205		-15.7519
2016-03-23		-22.7129	-15.0169
2016-03-24		-19.6324
2016-03-25		-26.8907
2016-03-26		-26.672	-13.2827
2016-03-27	-17.3886	-22.4115	-16.5722
2016-03-28	-9.35071	-20.2713	-19.8818
2016-03-29	-6.49112	-25.6007	-5.29943
2016-03-30
2016-03-31	-9.06226
2016-04-01		-28.349	-6.53615
2016-04-02	-18.0227	-38.8782	-30.5874
2016-04-03	-15.7028	-28.1111	-16.459
2016-04-04	-11.0514	-17.0197	-17.7841
2016-04-05	-6.48602		-9.67814
2016-04-06		-39.3371	-14.5783
2016-04-07	-13.7488	-32.2456	-27.7202
2016-04-08	-13.1293	-29.413	-28.4354
2016-04-09	-14.1356		8.52693
2016-04-10	-14.5401	-25.4428	-21.0168
2016-04-11	-8.82409	-33.2853	-27.5636
2016-04-12			-28.7719
2016-04-13	-11.8397	-39.5771	-25.582
2016-04-14	-15.5298	-22.0923	-12.9843
2016-04-15		-37.3086	-36.4583
2016-04-16	-17.8775	-49.0993	-32.7017
2016-04-17	-19.2086	-46.8409	-42.9567
2016-04-18	-22.2579	-54.3405	-38.186
2016-04-19	-21.2499	-53.876	-49.8017
2016-04-20	-33.3031	-51.1202	-38.5894
2016-04-21	-28.1003	-42.5183	-32.1411
2016-04-22	-24.0046	-31.4396	-23.683
2016-04-23	-15.6373
2016-04-24			-18.6151
2016-04-25
2016-04-26
2016-04-27		-52.4237
2016-04-28		-44.2974	-36.3587
2016-04-29		-43.0546	-25.793
2016-04-30	-18.8623	-33.1344	-30.2623

## Sheet:  Fig. 6c heat flux
	Spyhill	Stauffer	Triple G	Fort MacLeod		Daily average sensible heat flux
2016-11-01	0.0825503	-0.347546	0	6.6228		Positive = downwards
2016-11-02	16.3325	-9.58818	0	27.1445		Empty cell or 0 = No data
2016-11-03	25.8865	17.0304	0	16.2181		Watts per square metres
2016-11-04	5.12492	8.25708	0	8.28336
2016-11-05	10.3915	33.1786	0	15.774
2016-11-06	-2.45101	0.836793	0	-0.443702
2016-11-07	13.0162	3.5496	0	11.8696
2016-11-08	11.0645	33.6029	40.3346	21.1203
2016-11-09	17.3931	21.7134	33.6206	25.7532
2016-11-10	5.30459	-2.2203	6.36818	-3.73119
2016-11-11	13.847	2.5748	22.4708	21.6423
2016-11-12	20.3909	10.3737	31.8112	0
2016-11-13	15.7339	5.24305	7.11792	11.764
2016-11-14	15.3489	11.3024	19.2108	0
2016-11-15	6.78298	22.7233	4.05346	9.58441
2016-11-16	35.2559	-12.8614	0.127721	10.5006
2016-11-17	-3.48929	-3.89741	-6.40029	-1.26555
2016-11-18	-5.89833	-4.4328	-5.09358	-8.66446
2016-11-19	-1.43896	-7.7693	-4.25085	5.55308
2016-11-20	12.3659	-5.10313	0	9.61617
2016-11-21	41.6355	-0.396363	0	12.2538
2016-11-22	1.01382	0	0	12.541
2016-11-23	8.99709	0	0	27.7645
2016-11-24	26.2092	0	0	22.7757
2016-11-25	18.5182	21.4343	34.0455	26.1134
2016-11-26	11.4845	2.85976	23.8584	-2.77009
2016-11-27	9.9602	-7.45139	0	14.7031
2016-11-28	-0.0666039	2.45065	0	-5.34542
2016-11-29	6.41976	8.22855	7.07468	-2.53528
2016-11-30	-1.66145	0	0	5.22547
2016-12-01	4.83525	0	0	-0.946968
2016-12-02	31.1602	3.46282	0	14.627
2016-12-03	45.1455	13.7447	23.161	25.4707
2016-12-04	6.02104	12.4861	5.55398	14.8575
2016-12-05	20.4556	2.90164	2.71782	4.30882
2016-12-06	0.939489	-0.0779323	0.536437	3.47057
2016-12-07	11.0032	8.12602	-3.77757	0.598411
2016-12-08	-1.44475	-0.823509	-3.18693	-5.6379
2016-12-09	5.68934	3.70723	-2.32803	-1.53294
2016-12-10	2.6157	-0.993226	1.33616	-1.54432
2016-12-11	3.54286	5.44352	-2.10674	0.767926
2016-12-12	24.1514	24.1548	22.3377	7.24112
2016-12-13	31.1417	42.7366	38.4623	2.2759
2016-12-14	24.264	7.41723	19.1492	3.25982
2016-12-15	16.8968	10.582	-5.61481	1.23549
2016-12-16	11.1659	6.75669	12.2835	3.7917
2016-12-17	36.5711	4.17397	25.7732	27.3617
2016-12-18	60.4464	31.0126	52.7189
2016-12-19	73.57	45.5705	48.9103	0
2016-12-20	37.6106	25.4793	31.3905	44.6857
2016-12-21	58.1155	36.1332	49.2904	67.1535
2016-12-22	55.9804	29.5129	37.0496	0
2016-12-23	12.8487	4.22055	3.71284	13.5136
2016-12-24	92.4797	1.18138	-0.240216	48.4397
2016-12-25	1.50455	3.29344	1.45801	2.46702
2016-12-26	43.232	-1.02657	0
2016-12-27	57.9498	11.5402	41.9606	60.872
2016-12-28	66.0113	21.3684	57.2844	65.3637
2016-12-29	31.7418	11.5283	39.8328	54.4254
2016-12-30	32.1314	15.6783	21.27	22.983
2016-12-31	15.1858	13.5365	10.0712	33.0116
2017-01-01	-0.320668	8.0335	1.10655
2017-01-02	-3.56475	0.234225	-2.34227	2.99784
2017-01-03	14.4292	0	14.4761	4.42194
2017-01-04	20.941	19.2167	2.79024	5.13724
2017-01-05	6.7864	4.09955	3.33877	3.18674
2017-01-06	3.47776	-0.0227463	-1.09044	2.96576
2017-01-07	8.46111	-0.304615	-4.43217	3.20768
2017-01-08	1.33801	-0.607469	-1.22053	-0.229339
2017-01-09	8.53407	6.13779	-6.18257
2017-01-10	12.7904	13.0843	2.04398	1.27634
2017-01-11	36.7911	32.533	32.8131	13.9466
2017-01-12	31.6322	6.27248	18.2817	26.8901
2017-01-13	47.3655	1.23711	27.3268	43.0794
2017-01-14	62.5548	-2.53671	53.5274	45.1333
2017-01-15	66.6444	5.71324	51.9163
2017-01-16	49.0887	11.8679	42.8402	56.8919
2017-01-17	44.2725	62.0566	80.2916	0
2017-01-18	28.8418	31.7729	51.1274	75.2584
2017-01-19	30.8245	31.5345	24.6401	33.4223
2017-01-20	12.9732	-2.51072	15.685	8.65882
2017-01-21	3.33987	-3.40641	0	-4.09756
2017-01-22	-5.4923	-7.04734	0	-4.05951
2017-01-23	-5.39663	0	0	-6.45656
2017-01-24	-0.13596	0	0	-12.5149
2017-01-25	9.68795	0	0	-13.0215
2017-01-26	11.5819	5.32118	30.0107	-1.96721
2017-01-27	41.3811	3.51711	35.7478	16.5331
2017-01-28	57.7875	6.87984	69.7867	36.974
2017-01-29	36.8995	14.4461	69.8715	35.8775
2017-01-30	15.9697	28.3588	-2.27086	13.7836
2017-01-31	6.74942	14.1309	-0.976147	-19.6671
2017-02-01	0.199543	2.43849	-0.484744	-9.06462
2017-02-02	4.14392	1.29681	-6.31563	-15.9192
2017-02-03	-2.25175	-0.399057	-7.65548	-10.3037
2017-02-04	-3.114	-1.83843	-3.22748	-4.46025
2017-02-05	-2.18531	1.65693	-1.38823
2017-02-06	1.74871	-1.68253	0.0287836	0.967621
2017-02-07	8.57811	8.27949	7.42778	0.590449
2017-02-08	15.2953	7.31746	21.2086	2.44393
2017-02-09	4.81428	-1.29225	-0.120693	35.9263
2017-02-10	20.6131	-3.37577	25.7881	81.9449
2017-02-11	49.6149	12.8065	49.5965	20.2749
2017-02-12	84.7975	30.1384	73.5304	37.3769
2017-02-13	66.8627	8.84536	49.9217	5.73969
2017-02-14	30.1145	18.1414	53.8584	21.9525
2017-02-15	20.5475	46.7435	71.9497	0
2017-02-16	18.2071	37.6886	52.6974	19.8845
2017-02-17	7.33259	6.17798	25.3833	7.36682
2017-02-18	-11.143	-2.99735	0	-15.6623
2017-02-19	-6.98433	-0.271159	-1.92662	-6.69695
2017-02-20	-11.9927	-3.12412	-7.68829	1.62481
2017-02-21	-16.768	-10.9405	-3.37846	-4.20758
2017-02-22	-12.9783	-11.5927	-10.8322	-7.03016
2017-02-23	-7.85009	-2.10826	-10.075	-3.68365
2017-02-24	-2.74872	-3.65496	-4.09174	-15.244
2017-02-25	1.94583	-0.750128	-5.09356	0
2017-02-26	-1.62724	4.23488	-0.728479	-10.4889
2017-02-27	5.56577	-2.70644	2.92268	-9.54835
2017-02-28	3.04115	-0.973698	-1.21854	-3.32906
2017-03-01	15.5156	2.07357	12.6511	0
2017-03-02	16.4054	2.3063	20.6787	10.0417
2017-03-03	25.9332	21.9932	36.5149	10.4926
2017-03-04	-33.7469	-20.6735	-11.6433	-21.6426
2017-03-05	-17.7238	-20.7999	-19.9221
2017-03-06	-15.9178	-1.92967	-8.43355	-9.24514
2017-03-07	-23.5062	-4.56948	-5.76929	-22.7634
2017-03-08	-15.573	-8.53701	-6.18681	-3.47985
2017-03-09	-9.24421	-3.92977	-3.3821	-6.6232
2017-03-10	-6.84857	-2.22407	-5.14028	-8.27965
2017-03-11	-3.8397	-3.05405	-2.29165	-5.94186
2017-03-12	-2.14376	-7.40582	-5.06492	-2.60975
2017-03-13	37.1592	-2.31987	-1.02416	37.4137
2017-03-14	-5.79327	0.863952	15.5403	28.3339
2017-03-15	-10.3451	12.4733	18.5133	14.795
2017-03-16	-27.8085	3.40553	-5.63656	-34.3016
2017-03-17	-0.619639	10.2114	16.1519	-12.9833
2017-03-18	-7.95955	25.8512	36.3517	-13.4949
2017-03-19	-17.6222	7.63266	-5.86517	-32.2868
2017-03-20	-22.6204	-24.7117	-30.5719	-41.8491
2017-03-21	-21.0632	-20.6978	0	-36.2098
2017-03-22	-15.1016	-15.6142	0	-45.7599
2017-03-23	-17.3975	-25.0906	-24.7341	-44.9228
2017-03-24	-27.8469	0	0	-34.3126
2017-03-25	-16.3839	-14.6809	-20.4704	-37.8609
2017-03-26	-23.6798	-24.395	-25.3217	-44.1762
2017-03-27	-29.011	-33.3271	-31.8082	-33.9369
2017-03-28	-3.2372	-26.8569	-26.0696	-10.7389
2017-03-29	-18.6842	-9.93213	-17.3413	-11.9328
2017-03-30	-32.0311	-37.3485	-27.1544	0
2017-03-31	-42.0272	-32.6277	-44.3678	0
2017-04-01	-24.8864	-12.2638	-22.7165	-5.74688
2017-04-02	0.358293	-24.6765	-9.54689	0
2017-04-03	-2.57106	-30.9931	-22.7617	0
2017-04-04	-31.2859	-49.2873	-61.4674	-55.3248
2017-04-05	-21.4682	-26.263	-34.9364	-32.7633
2017-04-06	-27.2043	-16.1552	-26.4034	-7.82367
2017-04-07	-13.4642	3.7076	6.98519	-20.3016
2017-04-08	-24.2829	-38.1818	0	-34.1201
2017-04-09	-2.63992	-24.2295	-25.4785	0
2017-04-10	-34.3449	-36.2352	-43.1588	-24.3694
2017-04-11	-37.4078	-34.7832	-45.011	-49.2339
2017-04-12	-10.2613	-22.5588	-38.5224	0
2017-04-13	-17.8899	4.70854	0	0
2017-04-14	-14.2943	-35.573	0	-39.3831
2017-04-15	-29.21	-4.13553	-9.7938	-63.5611
2017-04-16	-38.1383	-20.4736	-54.2991	-45.2835
2017-04-17	-54.5629	-20.0449	-45.2699	-18.4339
2017-04-18	-52.748	-35.2454	-60.9316	-54.7053
2017-04-19	-63.8768	-40.4468	-42.4446	-50.5907
2017-04-20	-39.0507	-28.3958	-32.1879	-32.6833
2017-04-21	-20.2192	-49.049	-22.3839	0
2017-04-22	-46.6001	-12.3873	-40.0214	-33.0193
2017-04-23	-44.2707	0	0	-36.9608
2017-04-24	0.555883	-18.8063	15.3227	-39.5244
2017-04-25	-11.9812	-12.1557	0	0
2017-04-26	-1.22249	-16.1846	-4.70966	0
2017-04-27	-22.058	-25.635	-26.5693	0
2017-04-28	-51.6513	-41.0244	-31.6046	0
2017-04-29	-71.6835	-42.9186	-37.2676	-65.4317
2017-04-30	-32.5403	-38.3653	-28.3893	-56.4172
2017-05-01	-47.8361	-20.6772	-31.2328	-48.0542

## Sheet:  Fig. 6d heat flux
	Spyhill	Stauffer	Triple G	Fort MacLeod		Daily average latent heat flux
2016-11-01	-8.7912			-11.8636		Positive = downwards
2016-11-02	-13.6029			-15.5545		Empty cell or 0 = No data
2016-11-03		-24.5959		-14.6684		Watts per square metres
2016-11-04	-9.12539			-15.2561
2016-11-05	-8.24666	-21.0207		-16.9049
2016-11-06	-3.31174			-8.98472
2016-11-07		-9.68828		-12.0069
2016-11-08	-9.20618	-16.7329		-13.1685
2016-11-09		-11.2814	-14.1993	-12.2829
2016-11-10	-4.59527	-19.1327	-5.6163	-19.1747
2016-11-11	-5.06644	1.77599	-6.12032	-9.74752
2016-11-12	-4.05964	-1.54663	-9.52064
2016-11-13	-9.11403	-11.0385	-8.31625	-10.6632
2016-11-14	-6.9896	-7.07713	-7.50935
2016-11-15			-9.66375	3.70361
2016-11-16			-3.85764	-2.47201
2016-11-17		-7.94978	-7.17131	-5.85559
2016-11-18		-14.3828	-1.68986	-14.3707
2016-11-19		-11.6979	0.507026
2016-11-20		-8.96053		-6.26648
2016-11-21	-27.9358	0.99895		-9.88539
2016-11-22				-7.84862
2016-11-23				-4.31671
2016-11-24	-6.69196			-8.33484
2016-11-25	-8.48547	-9.10567	-5.41182	-7.80677
2016-11-26	-2.91536	-2.78761	-3.3091	-4.48027
2016-11-27		-16.9052		-5.95116
2016-11-28		1.11708		-3.61899
2016-11-29	-1.61209	0.406649	7.24666	-3.66151
2016-11-30				-5.58431
2016-12-01				-1.82884
2016-12-02		6.92335		-1.91061
2016-12-03	-25.5793	-4.992	-12.7035	-4.75962
2016-12-04		-2.50426	-7.38298	-3.82821
2016-12-05	3.32259	-8.21153	-2.37134	-1.15944
2016-12-06	-4.20867	-6.07003	0.556239	-0.229166
2016-12-07	0.270662	0.967311	1.64583	-0.911524
2016-12-08		-0.0548057	-1.26444	-2.22475
2016-12-09		-0.465915	-1.1966	-0.566002
2016-12-10		1.7376	0.03208	-1.26059
2016-12-11		-2.24954	-1.36647	0.169952
2016-12-12	-0.487456	-2.14285	1.21488	-1.71721
2016-12-13	-3.7501	-11.0952	-0.885469	-1.70624
2016-12-14	0.354678		-3.04181	0.217153
2016-12-15	1.32273	1.53327	1.74673	-3.68487
2016-12-16	2.37571	0.780398	-1.19876	-0.922489
2016-12-17	-6.32982	-0.281883	-3.43265	0.0519486
2016-12-18	-37.0547	-16.2734	-24.2218
2016-12-19	-51.7101	-23.5387	-12.7304
2016-12-20	-23.5436	-8.11479	-4.61837	-23.6467
2016-12-21	-25.6856	-12.5214	-3.81733	-28.633
2016-12-22	-30.4708	-10.263	-3.21929
2016-12-23		-1.77669	0.929563	-5.18283
2016-12-24	4.03864	-1.92868	-1.91073	2.82173
2016-12-25	3.08145	-0.340204	0.0430837	-2.77435
2016-12-26		2.05221
2016-12-27	-32.2141	-19.4223	-12.429	-25.4176
2016-12-28	-28.8299	-2.38983	-12.0719	-17.7285
2016-12-29	-8.24723	-0.49064	-2.75316	-19.7431
2016-12-30	1.48139	4.03528	0.335781	1.30782
2016-12-31	-8.4125	-6.51763	4.07544	-9.80917
2017-01-01	0.0780299	-2.64431	-7.14647
2017-01-02		-1.46837	3.13344	0.641077
2017-01-03			-15.8413	1.002
2017-01-04	4.583	6.58396	6.2152	-2.14557
2017-01-05	-4.71245		-0.487119	-1.14287
2017-01-06			-6.88183	16.4065
2017-01-07		-6.27713	16.6559	-3.82249
2017-01-08	-3.36961	-1.50503	0.961837	-1.1147
2017-01-09			9.62285
2017-01-10	0.871923		3.1605	-0.63582
2017-01-11	0.368884	-7.72493	-7.52696	0.551071
2017-01-12		4.64951	6.7286	-5.554
2017-01-13	-10.8877	-0.41222	0.235932	-3.15458
2017-01-14	-24.4768	-0.31878	-6.74756	-7.92652
2017-01-15	-38.1433	-1.45893	-11.0502
2017-01-16	-19.023	-3.95194	-5.14133	-30.4089
2017-01-17	-13.6177	-6.07433	-22.942
2017-01-18	-9.47245	-8.54526	-18.2159	-28.0416
2017-01-19	-17.2348	-11.4653	-11.0476	-9.80277
2017-01-20		-4.70952	-7.16904	-6.67031
2017-01-21	-3.09894	-7.42874		-6.47679
2017-01-22				-2.69057
2017-01-23				-15.5068
2017-01-24
2017-01-25	-10.471
2017-01-26	-7.20969	-2.9719	-4.47781	-6.80103
2017-01-27	-20.6741	-1.09971	-16.3637	-7.05767
2017-01-28	-22.332	-4.02501	-27.8906	-8.31952
2017-01-29	-21.3483	-7.03022	-26.0701	-14.4622
2017-01-30		-16.4438	-5.10968	-6.90874
2017-01-31	-14.4891	-8.74862	-8.19823	-6.87414
2017-02-01	-7.52859	-4.64574	1.28972	-6.97927
2017-02-02	-2.98717	-0.63543	-5.89595	-8.56841
2017-02-03	-4.60583	-4.64143	-3.41725	-8.89032
2017-02-04	-1.20658	-1.16378	-9.31732	-4.20762
2017-02-05			10.5015
2017-02-06	0.208673	-0.995278	-0.985185	-0.729137
2017-02-07	-3.66793	2.03698	-3.25048	0.344007
2017-02-08	-1.10069	2.24233	-0.259698	-1.42181
2017-02-09	-5.64686	-0.821488	-1.44588	-1.6505
2017-02-10		7.24267	-2.53754	-55.3771
2017-02-11	-21.1937	-1.15258	-8.85183	-36.1315
2017-02-12	-54.8988	-9.05361	-24.0086	-26.2851
2017-02-13	-29.0051		-13.4296	-12.5214
2017-02-14	-13.5816	-6.65866	-13.9443	-26.6453
2017-02-15	-13.5899	-10.2438	-24.3479
2017-02-16	-14.3667	-13.9653	-29.934	-15.1523
2017-02-17	-16.0921	-13.7455	-16.3476	-14.6343
2017-02-18	-11.1557			-6.73949
2017-02-19	-9.73139			-19.0569
2017-02-20		-10.6373	-13.1574	-6.11014
2017-02-21		-14.4168	-26.1998
2017-02-22		-14.8145	-14.5992
2017-02-23	-13.9178	-2.56685	-26.6391	-5.81392
2017-02-24		-2.39821	-10.1425	-29.7175
2017-02-25	-7.20426	-3.86859	10.0335
2017-02-26	-1.98626	-6.50828	-17.7089	-15.0264
2017-02-27	-3.15829	0.219089	-7.80792	-12.1366
2017-02-28	-3.2862	-1.50172	-5.73124	-4.99785
2017-03-01		-6.94372	-23.6803
2017-03-02		4.58445	-10.5733	-18.4833
2017-03-03	-31.6854	-20.4678	-36.1924	-33.5913
2017-03-04		-20.2713	7.5825	-31.3686
2017-03-05	-7.45658	-10.5766	-23.5261
2017-03-06	-6.53367	-4.61896	6.7126	-5.64357
2017-03-07	-9.55252	-1.71836	-5.33067	-23.4377
2017-03-08	-6.57519	-3.68411	-3.03782	-6.59345
2017-03-09	-2.77666	-0.357042	-6.21287	-5.13028
2017-03-10	-2.2931	-2.02414	-4.32037	-5.21729
2017-03-11		0.350748	-2.69657	-4.80299
2017-03-12	-2.9314	-3.20106	-2.58146	-3.54667
2017-03-13	-19.1264	-1.82403	-5.96663	-7.76957
2017-03-14	-13.2028	-5.22036	-4.09878	-31.1299
2017-03-15		-8.06776	-9.33142	-28.5924
2017-03-16		-6.15434	2.13476	-23.8878
2017-03-17		-8.65177	-28.5133
2017-03-18		-7.01233	-33.622	-17.6378
2017-03-19	-34.9681	-57.5854	-36.8377	-23.1814
2017-03-20	-12.714	-30.865	-22.6065	-13.4718
2017-03-21	-8.38239	-30.2536		-14.9992
2017-03-22				-37.0037
2017-03-23	-16.8729		-43.2472	-22.6569
2017-03-24				-4.34061
2017-03-25	-19.6614	-29.0591	-31.2477	-24.8081
2017-03-26	-14.193	-32.36	-24.5474	-21.9206
2017-03-27	-10.2748	-27.102	-18.8642	-20.1811
2017-03-28	-12.445	-28.335	-25.8081	-20.5745
2017-03-29	-10.526	-19.4937	-21.033	-15.747
2017-03-30	-7.75029	-19.7247	-44.2675
2017-03-31		-30.4749	-1.10372
2017-04-01		-19.7101	12.7028	-38.1349
2017-04-02			-24.7851
2017-04-03	-29.3549		-1.90353
2017-04-04	-33.3831	-26.176	-29.1384	-45.2
2017-04-05	-17.0868	-20.5169	-20.4905	-32.9054
2017-04-06	-17.5053	-20.0757	-22.3225	-19.9561
2017-04-07			-2.15398
2017-04-08				-43.9231
2017-04-09			-22.0254
2017-04-10			-42.4102	-44.1348
2017-04-11		-22.9644	-25.0261	-38.1833
2017-04-12			-16.6132
2017-04-13
2017-04-14				-51.7493
2017-04-15		-27.1334	-6.5941	-57.1108
2017-04-16		-36.2	-33.3325	-29.7032
2017-04-17	-21.4483	-29.4832	-29.5223	-22.433
2017-04-18		-25.7594	-35.3371
2017-04-19		-34.6026	70.9729
2017-04-20		-37.7071	-43.4475	-46.153
2017-04-21		-36.2874	-43.3208
2017-04-22		-17.332	-30.191	-35.4436
2017-04-23				-39.2351
2017-04-24			-18.0087
2017-04-25
2017-04-26	-5.2912		-9.58768
2017-04-27	-37.427	-21.6467	-4.55593
2017-04-28		-32.1155	-7.71138
2017-04-29		-43.1367	-35.5488
2017-04-30		-42.6607	-42.5231	-105.236
2017-05-01		-30.285	-36.7269	-69.963

## Sheet: Fig. 7a
Date	Spyhill	Stauffer	Triple G	Fort MacLeod			Air temperature, degrees Celcius
2017-01-01	-9.3728	-9.03	-8.73768	-5.54224
2017-01-01 00:30:00	-9.6494	-9.5	-9.41511	-5.75336
2017-01-01 01:00:00	-10.188	-9.85	-10.1207	-5.95887
2017-01-01 01:30:00	-10.647	-10.18	-9.89601	-7.04855
2017-01-01 02:00:00	-10.94	-10.48	-9.70341	-7.23975
2017-01-01 02:30:00	-11.336	-11.1	-9.85436	-7.73379
2017-01-01 03:00:00	-11.689	-11.2	-10.1749	-8.5347
2017-01-01 03:30:00	-12.069	-11.41	-10.484	-8.90469
2017-01-01 04:00:00	-12.342	-12.01	-10.8758	-9.21603
2017-01-01 04:30:00	-12.573	-12.37	-11.2156	-9.40554
2017-01-01 05:00:00	-12.872	-12.72	-11.5552	-9.89962
2017-01-01 05:30:00	-12.993	-12.61	-11.9166	-10.22
2017-01-01 06:00:00	-13.565	-12.46	-12.1179	-10.3372
2017-01-01 06:30:00	-13.857	-12.21	-12.3326	-10.5288
2017-01-01 07:00:00	-14.067	-12	-12.6633	-10.8913
2017-01-01 07:30:00	-14.183	-11.94	-12.9329	-11.1127
2017-01-01 08:00:00	-13.953	-11.51	-12.8878	-11.5045
2017-01-01 08:30:00	-13.725	-11.37	-12.8973	-11.9526
2017-01-01 09:00:00	-13.737	-11.5	-12.7839	-12.1463
2017-01-01 09:30:00	-13.522	-11.74	-12.9502	-12.24
2017-01-01 10:00:00	-13.432	-11.8	-12.9322	-12.3985
2017-01-01 10:30:00	-13.813	-11.73	-12.6421	-12.3681
2017-01-01 11:00:00	-13.913	-11.66	-12.2918	-12.4268
2017-01-01 11:30:00	-13.849	-11.59	-11.5819	-12.7245
2017-01-01 12:00:00	-13.764	-11.44	-11.5739	-12.8077
2017-01-01 12:30:00	-13.828	-11.38	-11.5295	-12.8188
2017-01-01 13:00:00	-13.806	-11.26	-11.449	-12.5235
2017-01-01 13:30:00	-13.782	-11.29	-11.1923	-12.3703
2017-01-01 14:00:00	-13.777	-11.38	-11.0842	-12.2367
2017-01-01 14:30:00	-13.684	-11.23	-11.051	-12.0419
2017-01-01 15:00:00	-13.648	-11.29	-11.0841	-11.9953
2017-01-01 15:30:00	-13.782	-11.44	-11.111	-11.9459
2017-01-01 16:00:00	-13.738	-11.66	-11.3091	-12.0407
2017-01-01 16:30:00	-13.742	-12.01	-11.9439	-12.1038
2017-01-01 17:00:00	-13.872	-13.5	-12.1813	-12.2638
2017-01-01 17:30:00	-14.073	-14.09	-12.1303	-12.4023
2017-01-01 18:00:00	-14.172	-13.88	-11.9616	-12.5533
2017-01-01 18:30:00	-14.437	-14.19	-12.4123	-12.6811
2017-01-01 19:00:00	-14.876	-14.28	-12.8883	-13.0242
2017-01-01 19:30:00	-15.135	-14.72	-13.4655	-13.2182
2017-01-01 20:00:00	-15.278	-15.34	-14.1478	-13.1144
2017-01-01 20:30:00	-15.823	-15.94	-14.4776	-13.295
2017-01-01 21:00:00	-17.08	-16.24	-15.0052	-13.2837
2017-01-01 21:30:00	-18.829	-16.6	-14.7693	-13.3988
2017-01-01 22:00:00	-18.766	-16.45	-14.7765	-14.5927
2017-01-01 22:30:00	-20.333	-17.05	-15.1953	-14.3828
2017-01-01 23:00:00	-20.67	-16.7	-15.5347	-13.7847
2017-01-01 23:30:00	-20.297	-16.95	-17.5861	-13.7238
2017-01-02	-21.608	-17.34	-19.3363	-14.0352
2017-01-02 00:30:00	-22.305	-16.77	-18.7552	-14.5227
2017-01-02 01:00:00	-21.809	-16.66	-18.251	-14.7484
2017-01-02 01:30:00	-22.265	-16.53	-20.1587	-15.0485
2017-01-02 02:00:00	-21.582	-16.5	-19.5491	-15.1501
2017-01-02 02:30:00	-20.791	-17.56	-19.8398	-15.2539
2017-01-02 03:00:00	-19.866	-18.87	-21.7293	-15.4705
2017-01-02 03:30:00	-21.392	-19.94	-21.898	-16.4004
2017-01-02 04:00:00	-21.786	-20.43	-22.136	-17.9463
2017-01-02 04:30:00	-22.132	-20.64	-19.3169	-18.7269
2017-01-02 05:00:00	-20.429	-21.67	-22.1146	-19.8248
2017-01-02 05:30:00	-21.991	-23.43	-21.7813	-22.4384
2017-01-02 06:00:00	-22.325	-24.35	-23.7214	-19.2415
2017-01-02 06:30:00	-23.7	-25.55	-23.311	-18.6138
2017-01-02 07:00:00	-24.145	-24.76	-21.9342	-18.1427
2017-01-02 07:30:00	-24.28	-24.37	-21.5569	-17.9005
2017-01-02 08:00:00	-23.883	-23.96	-21.4399	-17.7408
2017-01-02 08:30:00	-23.425	-24.56	-22.5339	-17.8823
2017-01-02 09:00:00	-24.595	-22.38	-20.8145	-18.8387
2017-01-02 09:30:00	-25.6	-24.89	-23.652	-20.0336
2017-01-02 10:00:00	-23.387	-27.15	-26.7286	-20.6616
2017-01-02 10:30:00	-22.9	-26.14	-25.4787	-19.553
2017-01-02 11:00:00	-19.758	-25.06	-25.1715	-18.4831
2017-01-02 11:30:00	-17.065	-23.03	-23.8453	-18.3033
2017-01-02 12:00:00	-16.42	-19.68	-26.1388	-18.3254
2017-01-02 12:30:00	-17.117	-20.58	-27.3612	-18.1327
2017-01-02 13:00:00	-16.672	-20.92	-25.7963	-17.7251
2017-01-02 13:30:00	-15.773	-21.09	-24.4049	-18.4766
2017-01-02 14:00:00	-14.952	-19.99	-24.3894	-18.269
2017-01-02 14:30:00	-13.336	-20	-22.9502	-18.2374
2017-01-02 15:00:00	-14.252	-20.35	-22.006	-18.0727
2017-01-02 15:30:00	-16.239	-19.72	-23.3693	-18.8174
2017-01-02 16:00:00	-17.078	-19.75	-24.0692	-19.1717
2017-01-02 16:30:00	-16.508	-18.69	-24.9723	-19.4042
2017-01-02 17:00:00	-17.39	-19.55	-24.3585	-19.3495
2017-01-02 17:30:00	-18.809	-19.75	-25.2399	-19.1658
2017-01-02 18:00:00	-20.204	-21.36	-26.5938	-19.5171
2017-01-02 18:30:00	-20.982	-21.83	-25.4735	-19.782
2017-01-02 19:00:00	-21.912	-21.39	-25.7747	-20.1987
2017-01-02 19:30:00	-22.027	-22.54	-24.7576	-20.1625
2017-01-02 20:00:00	-21.952	-22.36	-25.1232	-20.0768
2017-01-02 20:30:00	-20.917	-23.61	-25.2488	-20.1422
2017-01-02 21:00:00	-20.732	-24.35	-23.1753	-20.1806
2017-01-02 21:30:00	-20.197	-23.97	-22.6709	-19.842
2017-01-02 22:00:00	-19.853	-24.71	-23.4019	-19.5327
2017-01-02 22:30:00	-19.034	-23.92	-23.3804	-19.3769
2017-01-02 23:00:00	-18.81	-23.54	-22.3044	-19.5914
2017-01-02 23:30:00	-19.376	-23.98	-22.0066	-19.492
2017-01-03	-19.382	-22.86	-21.4424	-19.6592
2017-01-03 00:30:00	-19.865	-23.17	-22.0513	-19.6185
2017-01-03 01:00:00	-20.464	-23.51	-22.6713	-20.0361
2017-01-03 01:30:00	-21.11	-24.31	-21.23	-20.4267
2017-01-03 02:00:00	-20.976	-25.03	-21.4771	-20.5441
2017-01-03 02:30:00	-20.662	-25.28	-22.9087	-20.8082
2017-01-03 03:00:00	-20.265	-25.21	-25.2708	-20.955
2017-01-03 03:30:00	-20.151	-25.21	-25.0945	-21.341
2017-01-03 04:00:00	-20.116	-24.77	-24.9616	-20.9459
2017-01-03 04:30:00	-20.232	-25.43	-25.1007	-21.0407
2017-01-03 05:00:00	-20.347	-25.25	-24.5967	-20.3319
2017-01-03 05:30:00	-20.476	-25.12	-23.3026	-20.1738
2017-01-03 06:00:00	-20.939	-24.53	-22.7975	-20.3657
2017-01-03 06:30:00	-21.061	-24.12	-22.8935	-20.4786
2017-01-03 07:00:00	-21.026	-24.56	-23.7973	-20.806
2017-01-03 07:30:00	-20.878	-24.21	-22.9637	-21.0362
2017-01-03 08:00:00	-20.588	-24.63	-22.9115	-21.4516
2017-01-03 08:30:00	-20.942	-24.32	-23.0483	-20.9188
2017-01-03 09:00:00	-21.356	-24.86	-22.6625	-20.6886
2017-01-03 09:30:00	-22.057	-25.5	-23.0948	-20.9076
2017-01-03 10:00:00	-22.741	-25.25	-23.3218	-20.6728
2017-01-03 10:30:00	-23.454	-24.68	-23.7219	-20.3364
2017-01-03 11:00:00	-22.527	-23.8	-24.403	-19.9571
2017-01-03 11:30:00	-21.007	-23.77	-23.1299	-19.0789
2017-01-03 12:00:00	-20.054	-23.34	-22.5284	-19.7021
2017-01-03 12:30:00	-19.654	-22.52	-22.303	-19.6733
2017-01-03 13:00:00	-19.52	-21.94	-21.8996	-19.4401
2017-01-03 13:30:00	-18.333	-21	-21.7171	-20.4638
2017-01-03 14:00:00	-18.416	-20.61	-21.1281	-20.1466
2017-01-03 14:30:00	-18.211	-19.85	-21.256	-19.842
2017-01-03 15:00:00	-17.513	-19.32	-20.9663	-20.1986
2017-01-03 15:30:00	-17.515	-19.13	-21.4123	-20.2099
2017-01-03 16:00:00	-17.692	-19.05	-21.6228	-20.6161
2017-01-03 16:30:00	-17.938	-18.6	-20.6257	-21.5609
2017-01-03 17:00:00	-18.295	-19.34	-21.3261	-22.077
2017-01-03 17:30:00	-18.801	-19.9	-20.9271	-22.822
2017-01-03 18:00:00	-19.073	-21.18	-21.0507	-23.7605
2017-01-03 18:30:00	-19.077	-21.61	-20.7929	-24.7993
2017-01-03 19:00:00	-19.074	-21.69	-20.0481	-25.9074
2017-01-03 19:30:00	-19.056	-21.8	-20.0383	-26.2715
2017-01-03 20:00:00	-19.089	-22.08	-20.0792	-26.944
2017-01-03 20:30:00	-19.553	-20.32	-19.5666	-26.2579
2017-01-03 21:00:00	-19.25	-18.46	-19.6938	-27.6131
2017-01-03 21:30:00	-17.893	-18.1	-19.5036	-29.8176
2017-01-03 22:00:00	-17.095	-17.82	-19.1783	-29.6098
2017-01-03 22:30:00	-17.165	-17.57	-18.2007	-28.3946
2017-01-03 23:00:00	-17.395	-17.44	-18.6477	-27.333
2017-01-03 23:30:00	-17.057	-16.99	-18.7593	-26.6147
2017-01-04	-16.281	-17.19	-17.7028	-24.8069
2017-01-04 00:30:00	-15.582	-16.31	-16.7374	-23.9213
2017-01-04 01:00:00	-14.652	-15.45	-16.5297	-22.18
2017-01-04 01:30:00	-13.792	-15.18	-16.7667	-20.8637
2017-01-04 02:00:00	-13.712	-14.37	-16.219	-19.871
2017-01-04 02:30:00	-14.067	-13.46	-15.6984	-19.413
2017-01-04 03:00:00	-13.327	-13.12	-14.8334	-19.9255
2017-01-04 03:30:00	-12.7	-13.11	-13.898	-19.4559
2017-01-04 04:00:00	-12.468	-13.12	-13.4337	-19.0789
2017-01-04 04:30:00	-12.499	-12.79	-14.0219	-18.4923
2017-01-04 05:00:00	-12.42	-12.5	-14.1785	-18.1522
2017-01-04 05:30:00	-12.057	-12.32	-13.6807	-17.5202
2017-01-04 06:00:00	-11.826	-12.28	-13.0776	-17.1174
2017-01-04 06:30:00	-11.609	-12.61	-12.2888	-16.6328
2017-01-04 07:00:00	-11.956	-12.93	-11.9731	-18.7089
2017-01-04 07:30:00	-12.542	-13.51	-11.5167	-20.1844
2017-01-04 08:00:00	-12.616	-13.49	-11.2812	-20.3567
2017-01-04 08:30:00	-12.553	-13.1	-10.9265	-21.7925
2017-01-04 09:00:00	-12.237	-12.07	-10.8911	-21.1962
2017-01-04 09:30:00	-12.985	-11.19	-11.1861	-19.2679
2017-01-04 10:00:00	-14.581	-10.82	-11.2723	-20.1648
2017-01-04 10:30:00	-13.967	-10.43	-11.3805	-20.4109
2017-01-04 11:00:00	-12.614	-10.1	-10.9813	-19.1647
2017-01-04 11:30:00	-12.503	-9.75	-10.9703	-17.3204
2017-01-04 12:00:00	-12.17	-9.44	-11.2703	-14.5385
2017-01-04 12:30:00	-11.376	-9.2	-11.0658	-13.5297
2017-01-04 13:00:00	-10.844	-8.95	-10.7653	-12.2004
2017-01-04 13:30:00	-10.482	-8.7	-10.6812	-11.5554
2017-01-04 14:00:00	-10.207	-8.65	-10.8244	-13.5679
2017-01-04 14:30:00	-9.579	-8.64	-10.9019	-13.7284
2017-01-04 15:00:00	-8.8754	-9.04	-10.9306	-12.4402
2017-01-04 15:30:00	-8.759	-9.15	-11.5337	-12.1073
2017-01-04 16:00:00	-8.6983	-8.99	-11.5326	-13.8432
2017-01-04 16:30:00	-8.7013	-9.22	-11.2452	-12.8214
2017-01-04 17:00:00	-8.8245	-9.47	-12.1859	-13.3515
2017-01-04 17:30:00	-9.2622	-10.25	-12.9534	-14.8635
2017-01-04 18:00:00	-9.905	-11.14	-13.8118	-14.6378
2017-01-04 18:30:00	-10.32	-11.21	-13.7294	-13.8028
2017-01-04 19:00:00	-10.338	-11.53	-14.7391	-13.1618
2017-01-04 19:30:00	-10.157	-12.28	-14.8881	-13.6109
2017-01-04 20:00:00	-10.747	-12.43	-15.0672	-13.6493
2017-01-04 20:30:00	-11.219	-12.82	-14.4593	-13.6719
2017-01-04 21:00:00	-11.691	-12.24	-14.515	-13.4214
2017-01-04 21:30:00	-11.574	-12.59	-14.3481	-13.3221
2017-01-04 22:00:00	-11.701	-12.79	-15.2346	-14.1007
2017-01-04 22:30:00	-12.103	-14.31	-16.1179	-14.5904
2017-01-04 23:00:00	-12.538	-15.48	-15.7046	-15.6511
2017-01-04 23:30:00	-13.311	-15.92	-15.5179	-17.698
2017-01-05	-13.29	-16.07	-14.6192	-19.6637
2017-01-05 00:30:00	-12.582	-15.52	-14.4755	-21.3071
2017-01-05 01:00:00	-12.149	-15.14	-15.9455	-21.998
2017-01-05 01:30:00	-10.606	-14.19	-16.5419	-22.1559
2017-01-05 02:00:00	-10.085	-13.99	-14.9789	-21.856
2017-01-05 02:30:00	-9.7526	-13.97	-13.2404	-21.7446
2017-01-05 03:00:00	-9.4418	-13.96	-12.0884	-20.9066
2017-01-05 03:30:00	-8.9703	-14.46	-11.3302	-20.8344
2017-01-05 04:00:00	-9.1922	-14.28	-10.4399	-20.8143
2017-01-05 04:30:00	-8.4493	-13.82	-10.2865	-20.0859
2017-01-05 05:00:00	-8.2729	-13.19	-10.0796	-18.1622
2017-01-05 05:30:00	-8.1006	-12.66	-9.70686	-16.6092
2017-01-05 06:00:00	-8.0806	-11.06	-9.17256	-13.8278
2017-01-05 06:30:00	-8.2739	-7.594	-8.13638	-12.3042
2017-01-05 07:00:00	-7.9839	-7.225	-8.16842	-12.3855
2017-01-05 07:30:00	-8.0847	-6.953	-7.83545	-12.7849
2017-01-05 08:00:00	-8.0533	-6.46	-7.3447	-12.1034
2017-01-05 08:30:00	-7.3522	-6.16	-6.99443	-11.6227
2017-01-05 09:00:00	-7.2827	-6.119	-6.7396	-11.7793
2017-01-05 09:30:00	-7.2894	-6.154	-6.47635	-10.8654
2017-01-05 10:00:00	-7.1472	-6.199	-6.13037	-10.0256
2017-01-05 10:30:00	-7.1057	-6.172	-5.96115	-10.0727
2017-01-05 11:00:00	-7.0049	-6.172	-5.86783	-9.62943
2017-01-05 11:30:00	-6.8392	-6.181	-5.90563	-9.24751
2017-01-05 12:00:00	-6.8672	-6.176	-5.83913	-8.68357
2017-01-05 12:30:00	-6.5135	-6.111	-5.91493	-8.16242
2017-01-05 13:00:00	-6.1924	-5.996	-5.903	-7.79017
2017-01-05 13:30:00	-5.8427	-6.159	-5.87388	-7.54877
2017-01-05 14:00:00	-5.4164	-6.237	-5.98377	-7.07503
2017-01-05 14:30:00	-5.4898	-6.322	-6.08482	-5.0796
2017-01-05 15:00:00	-5.6645	-6.322	-5.91479	-6.15124
2017-01-05 15:30:00	-5.781	-6.38	-6.12413	-6.30011
2017-01-05 16:00:00	-5.7799	-6.581	-6.14101	-6.89336
2017-01-05 16:30:00	-5.8392	-7.078	-6.43357	-7.01271
2017-01-05 17:00:00	-6.2266	-7.45	-6.73647	-7.91283
2017-01-05 17:30:00	-6.6397	-7.863	-7.21199	-8.27299
2017-01-05 18:00:00	-7.8641	-9.1	-7.49563	-8.5347
2017-01-05 18:30:00	-8.3124	-9.82	-7.73397	-8.99493
2017-01-05 19:00:00	-8.5844	-10.28	-8.10576	-8.39708
2017-01-05 19:30:00	-8.9214	-10.39	-8.71192	-8.31586
2017-01-05 20:00:00	-9.142	-11.29	-9.01495	-8.05641
2017-01-05 20:30:00	-9.44	-12.48	-9.26963	-8.20991
2017-01-05 21:00:00	-9.618	-13.49	-9.54009	-8.3858
2017-01-05 21:30:00	-9.8032	-13.4	-10.1561	-8.33165
2017-01-05 22:00:00	-10.181	-13.03	-10.5283	-8.19854
2017-01-05 22:30:00	-10.535	-13.1	-12.1253	-8.34293
2017-01-05 23:00:00	-10.772	-12.93	-12.6282	-8.16019
2017-01-05 23:30:00	-11.011	-12.53	-13.5968	-7.77666
2017-01-06	-11.127	-12.83	-13.8341	-7.69544
2017-01-06 00:30:00	-11.328	-13.76	-14.172	-7.84434
2017-01-06 01:00:00	-11.443	-14.73	-13.6586	-8.37677
2017-01-06 01:30:00	-11.7	-15.34	-13.9606	-8.80994
2017-01-06 02:00:00	-11.785	-15.81	-14.1164	-9.20024
2017-01-06 02:30:00	-12.204	-16.2	-14.4012	-9.32658
2017-01-06 03:00:00	-12.971	-16.75	-14.6537	-9.45291
2017-01-06 03:30:00	-13.644	-17.59	-14.7042	-9.64919
2017-01-06 04:00:00	-14.564	-18.09	-14.8154	-9.97181
2017-01-06 04:30:00	-14.943	-18.37	-14.937	-10.7524
2017-01-06 05:00:00	-15.285	-18.18	-14.9339	-11.2234
2017-01-06 05:30:00	-14.091	-17.76	-14.8252	-11.668
2017-01-06 06:00:00	-14.01	-17.09	-14.6845	-12.8558
2017-01-06 06:30:00	-14.045	-16.79	-14.3675	-13.9201
2017-01-06 07:00:00	-14.041	-16.34	-14.5284	-14.209
2017-01-06 07:30:00	-14.17	-16.43	-14.8874	-14.6197
2017-01-06 08:00:00	-14.201	-16.4	-15.2113	-14.1503
2017-01-06 08:30:00	-14.103	-16.32	-15.4544	-13.8705
2017-01-06 09:00:00	-14.159	-16.2	-15.5209	-13.8434
2017-01-06 09:30:00	-14.268	-16.12	-15.9838	-13.2137
2017-01-06 10:00:00	-14.642	-16.15	-16.1886	-12.5322
2017-01-06 10:30:00	-14.798	-16.09	-16.1791	-11.7852
2017-01-06 11:00:00	-14.992	-15.89	-16.4985	-11.6164
2017-01-06 11:30:00	-15.148	-15.67	-16.8768	-11.5073
2017-01-06 12:00:00	-15.001	-15.78	-17.0403	-11.4042
2017-01-06 12:30:00	-14.864	-16.06	-16.9898	-11.5511
2017-01-06 13:00:00	-14.978	-16.25	-16.7884	-11.6152
2017-01-06 13:30:00	-15.071	-16.36	-16.3406	-11.8353
2017-01-06 14:00:00	-15.232	-16.46	-15.8267	-11.9138
2017-01-06 14:30:00	-15.018	-16.38	-15.5133	-12.79
2017-01-06 15:00:00	-15.176	-16.22	-15.2356	-13.3366
2017-01-06 15:30:00	-15.235	-16.3	-15.3307	-13.4528
2017-01-06 16:00:00	-15.38	-16.15	-15.69	-13.5699
2017-01-06 16:30:00	-15.65	-15.98	-15.6629	-13.8918
2017-01-06 17:00:00	-16.283	-16.54	-15.659	-15.6363
2017-01-06 17:30:00	-16.949	-16.62	-15.5395	-17.4791
2017-01-06 18:00:00	-17.472	-16.64	-15.5138	-17.4227
2017-01-06 18:30:00	-17.146	-16.87	-15.3872	-16.1634
2017-01-06 19:00:00	-17.008	-16.89	-15.3643	-15.3306
2017-01-06 19:30:00	-17.105	-17.22	-15.6534	-14.8319
2017-01-06 20:00:00	-17.225	-17.41	-16.0553	-14.473
2017-01-06 20:30:00	-17.184	-17.22	-17.0626	-14.3286
2017-01-06 21:00:00	-17.219	-17.21	-17.3629	-14.0194
2017-01-06 21:30:00	-17.355	-17.18	-17.0863	-13.884
2017-01-06 22:00:00	-17.399	-17.1	-16.9557	-14.0871
2017-01-06 22:30:00	-17.523	-17.07	-17.0186	-14.1684
2017-01-06 23:00:00	-17.504	-16.66	-17.0386	-14.2338
2017-01-06 23:30:00	-17.511	-16.49	-17.2689	-14.3106
2017-01-07	-17.576	-16.51	-17.4645	-14.4888
2017-01-07 00:30:00	-17.845	-16.61	-17.7658	-14.7845
2017-01-07 01:00:00	-18.074	-16.55	-18.1146	-15.0553
2017-01-07 01:30:00	-18.52	-16.41	-18.2567	-15.2629
2017-01-07 02:00:00	-18.918	-16.5	-18.3175	-15.4615
2017-01-07 02:30:00	-19.738	-16.48	-18.3528	-15.6692
2017-01-07 03:00:00	-20.197	-16.49	-18.5301	-15.9106
2017-01-07 03:30:00	-20.582	-16.4	-18.5615	-16.362
2017-01-07 04:00:00	-19.641	-16.3	-18.653	-17.5897
2017-01-07 04:30:00	-18.31	-16.26	-18.8832	-18.4563
2017-01-07 05:00:00	-18.149	-16.25	-19.0682	-18.2036
2017-01-07 05:30:00	-19.27	-16.84	-19.0837	-18.0433
2017-01-07 06:00:00	-19.833	-18.33	-18.9069	-17.8197
2017-01-07 06:30:00	-20.019	-19.15	-18.7501	-17.9234
2017-01-07 07:00:00	-19.673	-19.95	-18.6343	-18.0273
2017-01-07 07:30:00	-18.753	-21.15	-18.4938	-18.0291
2017-01-07 08:00:00	-18.649	-20.19	-18.296	-18.3903
2017-01-07 08:30:00	-18.923	-20.14	-18.1298	-19.5867
2017-01-07 09:00:00	-18.85	-19.14	-18.0184	-19.308
2017-01-07 09:30:00	-18.715	-17	-17.7697	-17.9966
2017-01-07 10:00:00	-18.327	-16.33	-17.5495	-18.7208
2017-01-07 10:30:00	-17.809	-16.13	-17.4031	-19.0721
2017-01-07 11:00:00	-17.158	-15.84	-17.0923	-18.8498
2017-01-07 11:30:00	-16.832	-15.78	-16.7887	-20.4246
2017-01-07 12:00:00	-16.581	-15.9	-16.3559	-19.9371
2017-01-07 12:30:00	-16.561	-15.9	-16.1825	-18.5617
2017-01-07 13:00:00	-16.52	-16.03	-15.8254	-17.7257
2017-01-07 13:30:00	-16.645	-16.39	-15.3997	-15.8518
2017-01-07 14:00:00	-16.632	-16.66	-15.2607	-16.5741
2017-01-07 14:30:00	-17.039	-16.83	-15.1888	-15.9851
2017-01-07 15:00:00	-17.179	-16.94	-15.056	-15.9761
2017-01-07 15:30:00	-17.202	-16.82	-15.0384	-16.0054
2017-01-07 16:00:00	-17.786	-16.77	-15.2129	-16.3913
2017-01-07 16:30:00	-18.365	-16.85	-15.548	-16.2649
2017-01-07 17:00:00	-18.676	-16.77	-15.8838	-17.1135
2017-01-07 17:30:00	-18.999	-16.83	-16.1137	-17.9711
2017-01-07 18:00:00	-19.001	-16.89	-16.2387	-18.7316
2017-01-07 18:30:00	-19.064	-17.14	-16.2898	-18.1289
2017-01-07 19:00:00	-19.266	-17.38	-16.547	-17.2995
2017-01-07 19:30:00	-19.361	-17.61	-16.6641	-16.7524
2017-01-07 20:00:00	-19.209	-17.75	-16.7269	-16.5674
2017-01-07 20:30:00	-19.197	-17.87	-16.7882	-16.6554
2017-01-07 21:00:00	-19.212	-18.06	-16.9402	-16.766
2017-01-07 21:30:00	-19.161	-18.26	-17.2544	-16.9578
2017-01-07 22:00:00	-19.024	-18.31	-17.6307	-17.1745
2017-01-07 22:30:00	-18.947	-18.43	-17.8318	-17.3347
2017-01-07 23:00:00	-18.939	-18.56	-17.9301	-17.4543
2017-01-07 23:30:00	-18.958	-18.63	-17.9938	-17.4723
2017-01-08	-18.989	-18.65	-18.0547	-17.5017
2017-01-08 00:30:00	-19.075	-18.67	-18.0746	-17.4295
2017-01-08 01:00:00	-19.267	-18.75	-18.198	-17.3121
2017-01-08 01:30:00	-19.512	-18.9	-18.4518	-17.2489
2017-01-08 02:00:00	-19.585	-19.09	-18.6701	-17.197
2017-01-08 02:30:00	-19.576	-19.21	-18.7922	-17.0368
2017-01-08 03:00:00	-19.749	-19.32	-18.9246	-16.9916
2017-01-08 03:30:00	-19.778	-19.37	-18.9234	-16.9375
2017-01-08 04:00:00	-19.893	-19.43	-18.864	-16.9916
2017-01-08 04:30:00	-20.019	-19.51	-18.8246	-17.1406
2017-01-08 05:00:00	-19.957	-19.49	-18.8591	-17.7612
2017-01-08 05:30:00	-19.899	-19.63	-19.0138	-18.1223
2017-01-08 06:00:00	-19.89	-20.44	-19.0903	-18.126
2017-01-08 06:30:00	-19.932	-20.85	-19.2027	-17.7645
2017-01-08 07:00:00	-19.942	-21	-19.3728	-17.7643
2017-01-08 07:30:00	-19.851	-20.99	-19.5154	-17.386
2017-01-08 08:00:00	-19.845	-21.18	-19.7924	-17.5626
2017-01-08 08:30:00	-19.879	-21.39	-20.0706	-17.7454
2017-01-08 09:00:00	-19.934	-21.52	-20.1741	-17.9124
2017-01-08 09:30:00	-19.997	-21.55	-20.2711	-18.034
2017-01-08 10:00:00	-20.011	-21.56	-20.4187	-18.1035
2017-01-08 10:30:00	-19.846	-21.51	-20.5654	-18.0358
2017-01-08 11:00:00	-19.576	-21.35	-20.5235	-18.1963
2017-01-08 11:30:00	-18.858	-21.3	-20.6032	-17.6483
2017-01-08 12:00:00	-18.089	-21.07	-20.7343	-17.1293
2017-01-08 12:30:00	-18.941	-20.91	-20.7771	-16.5809
2017-01-08 13:00:00	-18.704	-20.99	-20.6854	-16.1453
2017-01-08 13:30:00	-18.355	-20.99	-20.5147	-16.5741
2017-01-08 14:00:00	-18.11	-20.89	-20.3213	-16.9646
2017-01-08 14:30:00	-18.242	-20.83	-20.299	-17.0774
2017-01-08 15:00:00	-18.386	-20.89	-20.5111	-17.0278
2017-01-08 15:30:00	-18.837	-20.97	-20.1917	-17.6958
2017-01-08 16:00:00	-19.081	-21.25	-20.4036	-18.084
2017-01-08 16:30:00	-19.321	-21.52	-20.9877	-18.3886
2017-01-08 17:00:00	-19.565	-22.55	-21.4997	-18.928
2017-01-08 17:30:00	-19.82	-23.31	-21.8808	-18.8489
2017-01-08 18:00:00	-20.061	-23.77	-21.9722	-18.8335
2017-01-08 18:30:00	-20.144	-24.56	-22.1028	-18.7325
2017-01-08 19:00:00	-20.143	-24.86	-22.4747	-18.4677
2017-01-08 19:30:00	-20.156	-24.72	-22.531	-18.2604
2017-01-08 20:00:00	-20.047	-24.62	-22.2968	-18.109
2017-01-08 20:30:00	-19.966	-24.21	-22.3701	-18.0782
2017-01-08 21:00:00	-20.033	-23.77	-22.3101	-18.0587
2017-01-08 21:30:00	-20.025	-23.69	-21.9069	-18.1223
2017-01-08 22:00:00	-20.162	-23.44	-21.4812	-18.3457
2017-01-08 22:30:00	-20.266	-23.16	-21.3589	-18.1923
2017-01-08 23:00:00	-20.35	-23.06	-21.2846	-17.9844
2017-01-08 23:30:00	-20.176	-22.8	-21.2317	-17.953
2017-01-09	-20.172	-22.5	-20.9685	-17.856
2017-01-09 00:30:00	-20.182	-22.35	-20.7869	-17.7319
2017-01-09 01:00:00	-20.898	-22.14	-21.0054	-17.7635
2017-01-09 01:30:00	-21.606	-22.04	-21.1344	-18.1878
2017-01-09 02:00:00	-21.658	-21.86	-21.1278	-18.7789
2017-01-09 02:30:00	-22.381	-21.96	-21.1907	-19.4131
2017-01-09 03:00:00	-22.543	-22.03	-21.3285	-19.6452
2017-01-09 03:30:00	-22.49	-21.99	-21.453	-19.8496
2017-01-09 04:00:00	-22.371	-21.78	-21.5912	-20.0927
2017-01-09 04:30:00	-22.25	-21.79	-21.8052	-20.2936
2017-01-09 05:00:00	-22.22	-21.85	-21.8979	-20.4831
2017-01-09 05:30:00	-22.227	-21.95	-22.0743	-20.6886
2017-01-09 06:00:00	-22.523	-21.94	-22.1197	-20.9301
2017-01-09 06:30:00	-22.657	-22.01	-22.1177	-22.3321
2017-01-09 07:00:00	-23.041	-22.12	-22.0076	-23.5828
2017-01-09 07:30:00	-23.226	-22.11	-21.876	-24.19
2017-01-09 08:00:00	-23.625	-22.1	-21.8873	-25.698
2017-01-09 08:30:00	-24.17	-22.27	-21.9995	-25.5195
2017-01-09 09:00:00	-24.238	-22.65	-23.2091	-23.0291
2017-01-09 09:30:00	-24.348	-23.01	-24.5461	-22.2094
2017-01-09 10:00:00	-24.366	-23.65	-24.779	-21.6929
2017-01-09 10:30:00	-23.957	-24.03	-25.2903	-21.5554
2017-01-09 11:00:00	-23.348	-24.23	-25.0939	-21.3636
2017-01-09 11:30:00	-22.904	-23.89	-24.6416	-20.7834
2017-01-09 12:00:00	-22.473	-23.31	-24.6815	-20.4492
2017-01-09 12:30:00	-22.982	-23.1	-24.9327	-20.4583
2017-01-09 13:00:00	-22.358	-22.63	-24.4068	-20.3002
2017-01-09 13:30:00	-21.871	-21.74	-24.2104	-19.9527
2017-01-09 14:00:00	-22.673	-21.48	-23.6091	-19.5399
2017-01-09 14:30:00	-22.052	-21.71	-23.5957	-19.743
2017-01-09 15:00:00	-21.327	-21.57	-23.2253	-20.1598
2017-01-09 15:30:00	-21.254	-21.43	-22.715	-20.4328
2017-01-09 16:00:00	-21.413	-20.99	-22.9262	-20.4744
2017-01-09 16:30:00	-21.866	-20.62	-23.2507	-21.0091
2017-01-09 17:00:00	-22.569	-20.73	-24.2252	-21.0588
2017-01-09 17:30:00	-22.948	-21.09	-24.5251	-20.9437
2017-01-09 18:00:00	-23.371	-21.59	-23.8774	-20.955
2017-01-09 18:30:00	-23.589	-21.63	-24.1883	-21.1423
2017-01-09 19:00:00	-23.211	-20.73	-24.0921	-21.3907
2017-01-09 19:30:00	-22.278	-20.19	-24.031	-21.8986
2017-01-09 20:00:00	-22.056	-19.89	-22.7427	-22.2599
2017-01-09 20:30:00	-21.718	-19.65	-22.2154	-23.7856
2017-01-09 21:00:00	-21.586	-19.62	-21.7817	-24.4403
2017-01-09 21:30:00	-21.857	-19.63	-21.6558	-22.8665
2017-01-09 22:00:00	-22.215	-19.57	-21.2068	-21.6247
2017-01-09 22:30:00	-21.912	-19.55	-20.9873	-21.1892
2017-01-09 23:00:00	-21.757	-19.56	-20.4087	-20.8488
2017-01-09 23:30:00	-21.679	-19.71	-19.8142	-21.1446
2017-01-10	-21.697	-19.95	-19.6837	-20.5576
2017-01-10 00:30:00	-21.688	-19.96	-19.411	-20.1603
2017-01-10 01:00:00	-21.692	-20.04	-19.7679	-19.7539
2017-01-10 01:30:00	-21.959	-20.21	-20.3367	-20.1016
2017-01-10 02:00:00	-22.036	-20.23	-19.9659	-20.4447
2017-01-10 02:30:00	-22.192	-19.96	-19.7309	-20.7856
2017-01-10 03:00:00	-22.331	-19.82	-19.4137	-23.348
2017-01-10 03:30:00	-22.024	-19.81	-19.2875	-24.2944
2017-01-10 04:00:00	-21.884	-19.88	-19.3374	-24.5577
2017-01-10 04:30:00	-21.66	-20.22	-19.3388	-25.5644
2017-01-10 05:00:00	-21.543	-20.62	-18.9997	-25.6712
2017-01-10 05:30:00	-21.291	-21.08	-18.9037	-26.3686
2017-01-10 06:00:00	-20.972	-21.59	-18.8575	-27.649
2017-01-10 06:30:00	-20.783	-22.35	-18.9442	-26.8741
2017-01-10 07:00:00	-20.777	-22.54	-19.0918	-26.4406
2017-01-10 07:30:00	-20.824	-23.05	-19.3283	-26.477
2017-01-10 08:00:00	-21.021	-22.96	-19.2671	-24.8916
2017-01-10 08:30:00	-21.255	-22.68	-19.4007	-24.3414
2017-01-10 09:00:00	-21.258	-22.51	-19.7228	-23.6906
2017-01-10 09:30:00	-21.08	-22.32	-21.3028	-23.2436
2017-01-10 10:00:00	-21.121	-22.34	-23.101	-22.8371
2017-01-10 10:30:00	-20.956	-21.64	-20.8622	-22.3269
2017-01-10 11:00:00	-20.646	-21.24	-20.5705	-21.3422
2017-01-10 11:30:00	-19.236	-20.97	-20.6278	-20.2935
2017-01-10 12:00:00	-17.557	-19.05	-19.9556	-19.641
2017-01-10 12:30:00	-17.967	-19.17	-18.8479	-18.8058
2017-01-10 13:00:00	-17.996	-19.02	-18.7854	-18.2205
2017-01-10 13:30:00	-18.432	-18.9	-17.91	-17.5197
2017-01-10 14:00:00	-18.352	-18.55	-17.8878	-16.6418
2017-01-10 14:30:00	-18.3	-18.69	-18.538	-16.0235
2017-01-10 15:00:00	-19.201	-19.13	-18.8691	-15.8452
2017-01-10 15:30:00	-20.02	-19.23	-18.5621	-15.0666
2017-01-10 16:00:00	-20.452	-19.15	-19.217	-15.8361
2017-01-10 16:30:00	-20.53	-19.59	-19.0314	-17.5739
2017-01-10 17:00:00	-21.085	-19.66	-19.151	-18.7768
2017-01-10 17:30:00	-21.917	-19.69	-19.8693	-18.8174
2017-01-10 18:00:00	-22.304	-20.67	-21.4038	-19.225
2017-01-10 18:30:00	-22.698	-21.57	-22.8435	-19.9185
2017-01-10 19:00:00	-22.698	-22.58	-23.5226	-21.7113
2017-01-10 19:30:00	-23.278	-24.2	-23.8532	-25.0608
2017-01-10 20:00:00	-23.784	-25.03	-24.7185	-26.6395
2017-01-10 20:30:00	-23.884	-26.14	-24.0567	-27.6584
2017-01-10 21:00:00	-24.055	-25.03	-23.2198	-28.0117
2017-01-10 21:30:00	-24.555	-23.38	-24.2199	-27.3804
2017-01-10 22:00:00	-23.883	-22.41	-25.5852	-27.1184
2017-01-10 22:30:00	-23.084	-22.02	-24.5143	-27.9948
2017-01-10 23:00:00	-23.113	-21.08	-23.8762	-28.9706
2017-01-10 23:30:00	-22.393	-20.81	-21.475	-28.8305
2017-01-11	-22.046	-20.56	-20.3417	-28.5053
2017-01-11 00:30:00	-22.989	-20.4	-20.1523	-29.1987
2017-01-11 01:00:00	-23.087	-20.12	-20.0243	-27.8096
2017-01-11 01:30:00	-22.656	-19.6	-19.6322	-28.5166
2017-01-11 02:00:00	-22.202	-19	-19.1833	-26.818
2017-01-11 02:30:00	-21.96	-18.21	-19.1868	-27.8231
2017-01-11 03:00:00	-21.168	-17.95	-18.8232	-28.7289
2017-01-11 03:30:00	-20.666	-17.82	-18.4428	-27.5769
2017-01-11 04:00:00	-20.483	-18.81	-18.0054	-28.25
2017-01-11 04:30:00	-20.574	-19.3	-18.0439	-28.5256
2017-01-11 05:00:00	-20.342	-19.26	-17.9904	-27.4776
2017-01-11 05:30:00	-19.976	-19	-17.9814	-28.1258
2017-01-11 06:00:00	-19.528	-19.35	-19.0229	-29.0948
2017-01-11 06:30:00	-18.877	-18.67	-19.4354	-29.8176
2017-01-11 07:00:00	-18.855	-17.5	-19.7456	-29.4653
2017-01-11 07:30:00	-18.437	-15.96	-18.8581	-29.2574
2017-01-11 08:00:00	-18.127	-14.79	-18.1545	-29.0993
2017-01-11 08:30:00	-17.62	-15.92	-17.4208	-28.4059
2017-01-11 09:00:00	-17.468	-15.99	-17.6261	-28.1755
2017-01-11 09:30:00	-17.888	-14.41	-17.212	-28.4556
2017-01-11 10:00:00	-18.036	-12.92	-16.263	-26.6328
2017-01-11 10:30:00	-18.353	-13.06	-15.5177	-25.8881
2017-01-11 11:00:00	-17.538	-12.59	-15.01	-24.691
2017-01-11 11:30:00	-16.288	-12.41	-15.0869	-23.3472
2017-01-11 12:00:00	-15.447	-10.32	-14.9965	-21.3357
2017-01-11 12:30:00	-14.38	-9.35	-14.233	-21.1039
2017-01-11 13:00:00	-12.929	-9.17	-13.3097	-19.9797
2017-01-11 13:30:00	-12.217	-8.82	-11.9423	-19.4495
2017-01-11 14:00:00	-11.278	-8.18	-11.5623	-18.2983
2017-01-11 14:30:00	-10.284	-8.81	-11.1612	-17.0819
2017-01-11 15:00:00	-10.012	-9.13	-10.5974	-16.107
2017-01-11 15:30:00	-9.0219	-8.46	-10.3013	-15.536
2017-01-11 16:00:00	-8.3109	-6.748	-10.948	-14.6355
2017-01-11 16:30:00	-8.2248	-6.749	-10.6348	-14.5407
2017-01-11 17:00:00	-8.3617	-6.727	-10.0351	-14.3015
2017-01-11 17:30:00	-8.0722	-6.954	-10.3844	-14.2112
2017-01-11 18:00:00	-8.4861	-7.33	-11.0587	-16.6216
2017-01-11 18:30:00	-9.7133	-7.684	-9.3533	-17.6236
2017-01-11 19:00:00	-10.309	-7.426	-8.53803	-17.2389
2017-01-11 19:30:00	-9.6588	-7.7	-8.36544	-15.985
2017-01-11 20:00:00	-9.8746	-8.26	-9.13186	-16.5588
2017-01-11 20:30:00	-10.124	-8.8	-8.13902	-18.1969
2017-01-11 21:00:00	-10.565	-9.58	-8.8198	-17.0707
2017-01-11 21:30:00	-11.11	-10.59	-10.0025	-18.2567
2017-01-11 22:00:00	-11.714	-11.38	-11.2097	-19.3277
2017-01-11 22:30:00	-12.637	-13.88	-13.9913	-19.9549
2017-01-11 23:00:00	-12.344	-16.17	-15.4615	-19.5304
2017-01-11 23:30:00	-12.738	-16.8	-16.4971	-19.0518
2017-01-12	-14.2	-17.07	-17.5985	-17.4422
2017-01-12 00:30:00	-15.11	-18.38	-18.1827	-18.0246
2017-01-12 01:00:00	-15.923	-18.85	-18.7632	-20.0655
2017-01-12 01:30:00	-17.821	-19.29	-19.7636	-18.7967
2017-01-12 02:00:00	-17.427	-19.63	-22.4753	-17.5573
2017-01-12 02:30:00	-16.41	-20.28	-23.0393	-16.9712
2017-01-12 03:00:00	-16.278	-19.82	-22.5994	-17.4186
2017-01-12 03:30:00	-16.569	-19.07	-21.5553	-17.4791
2017-01-12 04:00:00	-16.788	-18.77	-20.8944	-16.8878
2017-01-12 04:30:00	-17.011	-18.41	-20.4641	-16.4748
2017-01-12 05:00:00	-16.892	-18.04	-19.2975	-16.45
2017-01-12 05:30:00	-16.626	-18.28	-19.4792	-17.3076
2017-01-12 06:00:00	-16.541	-18.47	-19.6535	-18.3814
2017-01-12 06:30:00	-16.743	-18.07	-18.9353	-18.8275
2017-01-12 07:00:00	-17.057	-17.86	-19.4414	-19.1241
2017-01-12 07:30:00	-17.645	-18.03	-19.6747	-19.6975
2017-01-12 08:00:00	-17.722	-18.83	-19.6424	-20.8714
2017-01-12 08:30:00	-17.441	-18.9	-20.4118	-21.4652
2017-01-12 09:00:00	-18.309	-20.03	-20.2959	-20.6181
2017-01-12 09:30:00	-18.34	-16.52	-20.3841	-21.2324
2017-01-12 10:00:00	-19.241	-16.86	-21.4142	-21.6413
2017-01-12 10:30:00	-19.046	-18.46	-19.9505	-22.2733
2017-01-12 11:00:00	-18.057	-18.59	-19.6328	-23.7792
2017-01-12 11:30:00	-16.602	-18.15	-19.4103	-23.2622
2017-01-12 12:00:00	-15.736	-17.96	-18.912	-21.0724
2017-01-12 12:30:00	-15.48	-18.24	-18.3832	-17.5235
2017-01-12 13:00:00	-15.099	-18.25	-17.1442	-13.8658
2017-01-12 13:30:00	-13.836	-17.75	-16.9485	-11.0923
2017-01-12 14:00:00	-13.07	-17.37	-16.5783	-13.1571
2017-01-12 14:30:00	-12.353	-17.42	-16.7624	-14.8784
2017-01-12 15:00:00	-11.151	-16.69	-17.4938	-16.902
2017-01-12 15:30:00	-9.9676	-16.45	-18.4391	-17.1587
2017-01-12 16:00:00	-8.5671	-16.83	-19.2502	-14.9379
2017-01-12 16:30:00	-6.5164	-17.29	-19.607	-14.0555
2017-01-12 17:00:00	-4.8624	-17.75	-19.72	-12.2433
2017-01-12 17:30:00	-5.4224	-18.07	-19.6156	-10.312
2017-01-12 18:00:00	-5.6276	-18.67	-19.8281	-7.64032
2017-01-12 18:30:00	-5.5375	-19.11	-19.9067	-8.09023
2017-01-12 19:00:00	-5.3727	-19.51	-19.3403	-8.01578
2017-01-12 19:30:00	-5.479	-19.94	-18.7226	-8.20529
2017-01-12 20:00:00	-5.587	-20.21	-19.055	-8.5076
2017-01-12 20:30:00	-5.3719	-20.53	-19.5983	-8.62491
2017-01-12 21:00:00	-5.1725	-21.14	-19.6819	-8.69034
2017-01-12 21:30:00	-4.9866	-21.81	-19.3896	-8.93174
2017-01-12 22:00:00	-5.4066	-22.44	-18.2701	-8.34742
2017-01-12 22:30:00	-5.5612	-22.37	-17.7451	-8.49858
2017-01-12 23:00:00	-5.5657	-22.4	-14.9544	-8.83473
2017-01-12 23:30:00	-5.8199	-22.07	-11.8533	-9.71008
2017-01-13	-5.7594	-22.54	-10.7426	-8.30442
2017-01-13 00:30:00	-5.7079	-21.94	-9.43333	-8.08346
2017-01-13 01:00:00	-5.9218	-21.73	-8.41493	-8.01578
2017-01-13 01:30:00	-6.0182	-20.75	-8.16097	-7.82852
2017-01-13 02:00:00	-5.7975	-19.51	-7.35242	-7.88042
2017-01-13 02:30:00	-5.8938	-12.11	-7.80778	-8.29553
2017-01-13 03:00:00	-6.2668	-14.92	-7.75981	-8.3023
2017-01-13 03:30:00	-6.1694	-12.4	-7.8197	-8.05413
2017-01-13 04:00:00	-5.9689	-10.82	-8.51876	-8.12181
2017-01-13 04:30:00	-6.0787	-10.08	-9.95412	-8.36998
2017-01-13 05:00:00	-6.3911	-13.31	-10.7965	-8.32712
2017-01-13 05:30:00	-6.3183	-14.57	-10.8963	-8.2662
2017-01-13 06:00:00	-6.5748	-14.61	-10.4599	-8.26395
2017-01-13 06:30:00	-6.511	-14.31	-9.0238	-8.08572
2017-01-13 07:00:00	-6.6174	-13.96	-8.77065	-8.03608
2017-01-13 07:30:00	-6.0955	-15.23	-8.40015	-8.22559
2017-01-13 08:00:00	-6.3721	-15.37	-9.87737	-8.29553
2017-01-13 08:30:00	-5.9342	-17.31	-10.8354	-7.85109
2017-01-13 09:00:00	-5.7516	-15.45	-13.406	-8.02029
2017-01-13 09:30:00	-5.8412	-16.08	-13.8485	-7.87139
2017-01-13 10:00:00	-5.6945	-18.71	-13.3621	-7.55554
2017-01-13 10:30:00	-8.4958	-16.44	-13.5524	-7.59389
2017-01-13 11:00:00	-10.249	-16.72	-13.1123	-7.41792
2017-01-13 11:30:00	-9.2345	-15.89	-11.0212	-7.30061
2017-01-13 12:00:00	-7.1132	-13.4	-8.58908	-7.94133
2017-01-13 12:30:00	-4.891	-13.02	-8.39865	-6.4997
2017-01-13 13:00:00	-4.4724	-13.23	-8.97389	-5.65456
2017-01-13 13:30:00	-5.2196	-11.41	-8.60578	-5.27364
2017-01-13 14:00:00	-5.3374	-11.54	-8.59675	-5.65499
2017-01-13 14:30:00	-5.1106	-10.27	-8.59399	-6.69937
2017-01-13 15:00:00	-4.4838	-10.77	-8.58024	-7.96481
2017-01-13 15:30:00	-4.3996	-10.27	-8.4434	-6.11515
2017-01-13 16:00:00	-4.6035	-9.85	-8.72139	-6.12643
2017-01-13 16:30:00	-4.5914	-10.28	-8.54544	-7.54299
2017-01-13 17:00:00	-4.3105	-10.59	-8.43658	-6.28052
2017-01-13 17:30:00	-3.8766	-11.04	-8.26869	-4.45217
2017-01-13 18:00:00	-4.3051	-12.38	-8.10028	-4.92415
2017-01-13 18:30:00	-3.7206	-12.75	-8.14291	-5.50837
2017-01-13 19:00:00	-3.5921	-12.86	-8.26125	-5.71696
2017-01-13 19:30:00	-3.5651	-13.42	-8.90244	-5.92181
2017-01-13 20:00:00	-3.4162	-14.3	-8.51682	-6.4615
2017-01-13 20:30:00	-3.6872	-13.63	-8.0129	-6.60802
2017-01-13 21:00:00	-3.8839	-13.78	-9.16321	-6.75241
2017-01-13 21:30:00	-4.0721	-14.36	-9.61234	-7.41795
2017-01-13 22:00:00	-3.9268	-14.6	-10.1865	-8.14214
2017-01-13 22:30:00	-4.4002	-15.53	-10.4447	-8.01806
2017-01-13 23:00:00	-5.0107	-16.76	-10.5534	-8.30909
2017-01-13 23:30:00	-4.8866	-17.1	-11.6665	-7.8827
2017-01-14	-4.8826	-17.69	-10.1227	-8.17373
2017-01-14 00:30:00	-5.1634	-17.61	-10.8328	-8.07672
2017-01-14 01:00:00	-5.5721	-17.69	-12.8688	-8.29104
2017-01-14 01:30:00	-5.7382	-17.32	-13.06	-8.03836
2017-01-14 02:00:00	-5.8681	-17.74	-10.4144	-7.68416
2017-01-14 02:30:00	-5.4705	-18.38	-6.48599	-7.29161
2017-01-14 03:00:00	-4.6035	-17.34	-5.89833	-7.85562
2017-01-14 03:30:00	-3.834	-18.02	-9.63842	-7.34124
2017-01-14 04:00:00	-4.5154	-17.49	-7.61416	-7.1382
2017-01-14 04:30:00	-4.7502	-17.91	-7.44968	-6.91936
2017-01-14 05:00:00	-4.064	-17.14	-7.2344	-7.0096
2017-01-14 05:30:00	-3.7798	-17.52	-5.65984	-7.42923
2017-01-14 06:00:00	-4.2971	-17.51	-5.39888	-7.73154
2017-01-14 06:30:00	-3.792	-18.55	-5.69703	-7.11112
2017-01-14 07:00:00	-3.5313	-17.65	-5.73451	-6.76143
2017-01-14 07:30:00	-3.0628	-17.19	-4.86059	-6.50199
2017-01-14 08:00:00	-2.9302	-17.41	-5.12371	-6.45461
2017-01-14 08:30:00	-2.666	-15.99	-4.75146	-6.19742
2017-01-14 09:00:00	-2.5361	-16.52	-5.00305	-6.71857
2017-01-14 09:30:00	-3.2146	-16.7	-5.04568	-6.99832
2017-01-14 10:00:00	-3.2751	-16.15	-5.11515	-7.03442
2017-01-14 10:30:00	-2.5943	-15.01	-4.44324	-6.2651
2017-01-14 11:00:00	-1.9953	-13.53	-6.64831	-5.39671
2017-01-14 11:30:00	-1.4463	-12.52	-5.58278	-4.97725
2017-01-14 12:00:00	-1.0637	-12.53	-4.53941	-4.36248
2017-01-14 12:30:00	-0.23408	-13.26	-3.68224	-3.93165
2017-01-14 13:00:00	0.41486	-11.79	-2.61245	-3.58202
2017-01-14 13:30:00	1.189	-10.62	-3.28568	-2.87824
2017-01-14 14:00:00	1.8692	-8.95	-4.48233	-2.27
2017-01-14 14:30:00	2.5006	-7.939	-4.38424	-1.80299
2017-01-14 15:00:00	3.0922	-5.605	-1.46315	-1.09899
2017-01-14 15:30:00	3.1394	-5.869	0.223975	-0.703528
2017-01-14 16:00:00	2.9703	-5.744	-4.22109	-0.983137
2017-01-14 16:30:00	2.9927	-5.622	-5.14393	-1.3393
2017-01-14 17:00:00	2.8651	-6.617	-4.6401	-1.14756
2017-01-14 17:30:00	2.3449	-6.649	-3.23431	-1.57297
2017-01-14 18:00:00	1.9279	-6.382	-3.3035	-1.96661
2017-01-14 18:30:00	1.8636	-6.42	-3.21813	-2.27175
2017-01-14 19:00:00	1.9795	-6.72	-3.13361	-2.33939
2017-01-14 19:30:00	1.6447	-6.508	-1.44598	-2.32583
2017-01-14 20:00:00	2.0173	-6.721	-1.10111	-2.21058
2017-01-14 20:30:00	2.6074	-6.779	-2.02988	-2.17234
2017-01-14 21:00:00	2.2786	-6.407	0.443705	-2.50382
2017-01-14 21:30:00	2.0613	-5.399	0.449572	-2.2602
2017-01-14 22:00:00	2.1721	-7.928	0.90179	-2.03915
2017-01-14 22:30:00	2.6389	-6.157	1.67248	-1.89711
2017-01-14 23:00:00	2.9444	-5.709	0.53244	-2.17006
2017-01-14 23:30:00	3.2051	-4.947	-0.347664	-2.23324
2017-01-15	3.1801	-8.03	-0.848116	-2.08426
2017-01-15 00:30:00	3.293	-7.158	-0.0575316	-2.29647
2017-01-15 01:00:00	2.8108	-7.356	0.0564819	-2.44518
2017-01-15 01:30:00	2.5266	-7.863	-0.877448	-2.46547
2017-01-15 02:00:00	3.4329	-8.06	0.0946549	-2.52637
2017-01-15 02:30:00	3.584	-6.795	-0.14392	-2.52412
2017-01-15 03:00:00	3.0927	-6.551	0.493975	-2.07524
2017-01-15 03:30:00	3.0077	-5.78	0.909653	-1.7414
2017-01-15 04:00:00	3.1286	-6.641	1.32025	-1.5029
2017-01-15 04:30:00	3.255	-5.658	1.98537	-1.26852
2017-01-15 05:00:00	3.2181	-2.615	3.20289	-1.11233
2017-01-15 05:30:00	2.7794	1.561	2.15561	-1.19192
2017-01-15 06:00:00	2.4997	2.149	1.90509	-0.966449
2017-01-15 06:30:00	2.0991	2.318	1.99375	-0.945481
2017-01-15 07:00:00	2.6351	2.92	1.61868	-0.848351
2017-01-15 07:30:00	1.8988	2.33	1.48571	-0.708035
2017-01-15 08:00:00	2.0968	2.141	2.52434	-0.478744
2017-01-15 08:30:00	2.2024	2.551	2.13998	-0.706989
2017-01-15 09:00:00	2.9954	2.906	2.34714	-1.07176
2017-01-15 09:30:00	3.094	1.924	3.04161	-1.31781
2017-01-15 10:00:00	2.4494	0.341	3.15922	-1.24188
2017-01-15 10:30:00	1.9179	-0.357	2.51862	-1.1983
2017-01-15 11:00:00	2.2233	0.422	2.42909	-1.09946
2017-01-15 11:30:00	2.0517	1.867	2.72931	-1.10742
2017-01-15 12:00:00	2.0499	1.944	3.16646	-0.432216
2017-01-15 12:30:00	2.2675	2.131	2.88691	-0.699501
2017-01-15 13:00:00	2.6005	1.772	2.13655	-0.758918
2017-01-15 13:30:00	3.0007	2.374	1.40686	-0.935229
2017-01-15 14:00:00	3.4777	2.594	0.888803	-0.608473
2017-01-15 14:30:00	3.3975	2.399	1.1406	-0.338139
2017-01-15 15:00:00	3.9799	3.018	1.76155	0.464521
2017-01-15 15:30:00	3.7663	1.559	1.8203	1.36874
2017-01-15 16:00:00	3.6879	1.641	1.66405	1.61904
2017-01-15 16:30:00	3.3937	1.547	1.87574	1.33492
2017-01-15 17:00:00	3.4765	0.76	1.92694	0.64266
2017-01-15 17:30:00	3.0626	0.56	3.01219	0.20746
2017-01-15 18:00:00	2.1176	-1.27	3.46421	-0.850097
2017-01-15 18:30:00	1.3032	-2.803	2.61343	-2.51602
2017-01-15 19:00:00	1.0471	-3.561	2.24296	-3.12453
2017-01-15 19:30:00	0.75721	-3.866	1.94332	-4.44596
2017-01-15 20:00:00	0.63162	-3.807	1.52301	-5.2581
2017-01-15 20:30:00	0.50672	-4.68	0.593611	-5.08518
2017-01-15 21:00:00	0.27755	-5.665	-0.34509	-5.82291
2017-01-15 21:30:00	0.31675	-6.759	-0.511587	-5.17091
2017-01-15 22:00:00	0.19139	-3.15	-1.63878	-3.8105
2017-01-15 22:30:00	0.3425	-6.038	-1.8098	-4.65216
2017-01-15 23:00:00	0.4992	-2.735	-0.714182	-5.78931
2017-01-15 23:30:00	0.42869	-4.082	-0.6771	-7.09759
2017-01-16	0.36264	-2.023	-0.922883	-7.25551
2017-01-16 00:30:00	0.58348	-4.41	-3.92733	-8.69939
2017-01-16 01:00:00	0.17573	-3.4	-1.56352	-8.54355
2017-01-16 01:30:00	0.04052	-3.205	-1.84754	-9.08836
2017-01-16 02:00:00	0.03245	-5.844	-2.01811	-8.78463
2017-01-16 02:30:00	-0.19812	-7.3	-2.40308	-8.57619
2017-01-16 03:00:00	-0.18693	-5.623	-2.49454	-8.51701
2017-01-16 03:30:00	-0.21603	-6.694	-2.51042	-8.65516
2017-01-16 04:00:00	-0.54735	-7.427	-3.35284	-7.88943
2017-01-16 04:30:00	-0.90846	-5.864	-4.30923	-8.34886
2017-01-16 05:00:00	-0.28985	-6.482	-2.44168	-8.227
2017-01-16 05:30:00	-0.46427	-10.08	-3.40563	-8.77799
2017-01-16 06:00:00	-0.2769	-8.69	-5.57155	-8.46829
2017-01-16 06:30:00	-1.0315	-6.957	-5.90612	-7.66273
2017-01-16 07:00:00	-1.4555	-7.376	-5.68759	-7.00718
2017-01-16 07:30:00	-1.6562	-5.837	-6.77102	-6.40269
2017-01-16 08:00:00	-1.901	-6.02	-6.513	-6.6644
2017-01-16 08:30:00	-1.6804	-7.025	-6.33391	-8.59333
2017-01-16 09:00:00	-1.3386	-7.355	-5.87453	-7.12238
2017-01-16 09:30:00	-1.5159	-10.87	-5.31029	-4.22785
2017-01-16 10:00:00	0.03639	-10.43	-4.75316	-3.23345
2017-01-16 10:30:00	0.33322	-11.61	-4.50841	-2.06834
2017-01-16 11:00:00	1.5391	-10.14	-3.21081	-0.981215
2017-01-16 11:30:00	2.6701	-9.41	-2.42168	-0.478654
2017-01-16 12:00:00	3.2741	-10.35	-1.78822	0.151423
2017-01-16 12:30:00	3.9457	-9.26	-1.63457	0.741876
2017-01-16 13:00:00	4.7959	-8.78	-2.80025	1.30335
2017-01-16 13:30:00	5.368	-7.694	-2.02612	1.716
2017-01-16 14:00:00	5.9833	-7.065	-2.32955	2.06326
2017-01-16 14:30:00	6.177	-5.915	-2.80633	2.47365
2017-01-16 15:00:00	6.118	-4.894	-2.31408	2.76905
2017-01-16 15:30:00	6.0739	-4.2	-1.82355	2.75326
2017-01-16 16:00:00	6.5962	-3.321	-1.9405	3.25386
2017-01-16 16:30:00	7.0861	-2.635	-2.34364	4.13778
2017-01-16 17:00:00	7	-3.096	-2.92336	3.64621
2017-01-16 17:30:00	7.2326	-3.795	-3.21006	3.14336
2017-01-16 18:00:00	7.6219	-3.709	-3.49553	3.47258
2017-01-16 18:30:00	7.0184	-2.841	-2.84948	3.37111
2017-01-16 19:00:00	5.7481	2.108	-1.69206	2.36316
2017-01-16 19:30:00	6.68	4.9	-2.27593	2.6112
2017-01-16 20:00:00	6.8154	5.78	-0.583589	3.01032
2017-01-16 20:30:00	5.9015	6.631	-0.402629	3.76798
2017-01-16 21:00:00	5.6634	6.4	-0.521011	3.38464
2017-01-16 21:30:00	6.6033	6.055	5.09653	3.62366
2017-01-16 22:00:00	6.8836	6.171	5.86026	3.72964
2017-01-16 22:30:00	5.7788	6.823	6.45233	4.47151
2017-01-16 23:00:00	5.2986	6.447	5.29336	5.4524
2017-01-16 23:30:00	5.7668	6.604	5.01704	5.17956
2017-01-17	6.19	6.407	5.98836	4.91348
2017-01-17 00:30:00	5.1093	6.44	5.51014	4.87514
2017-01-17 01:00:00	5.6542	6.47	5.36365	4.98789
2017-01-17 01:30:00	5.8321	7.06	5.22314	4.95857
2017-01-17 02:00:00	6.6812	6.46	5.94127	6.43555
2017-01-17 02:30:00	8.14	6.115	6.43572	4.80975
2017-01-17 03:00:00	9.0049	6.313	5.9588	4.48504
2017-01-17 03:30:00	8.4982	6.028	6.34495	4.39935
2017-01-17 04:00:00	7.6611	5.914	5.50609	4.16484
2017-01-17 04:30:00	7.3781	6.285	5.35862	4.53014
2017-01-17 05:00:00	7.4765	6.427	5.20742	4.65191
2017-01-17 05:30:00	7.3568	6.174	5.60664	4.56622
2017-01-17 06:00:00	6.9564	5.933	5.30862	4.47602
2017-01-17 06:30:00	7.1387	5.746	4.86203	4.53014
2017-01-17 07:00:00	7.8412	5.65	4.723	4.51886
2017-01-17 07:30:00	8.4239	5.949	4.8959	4.43318
2017-01-17 08:00:00	8.3477	5.168	4.7826	4.53465
2017-01-17 08:30:00	8.3583	5.085	4.55479	4.71279
2017-01-17 09:00:00	7.6965	5.064	5.49479	4.73985
2017-01-17 09:30:00	6.6572	5.931	5.70037	4.7624
2017-01-17 10:00:00	5.5216	6.396	5.26169	5.00818
2017-01-17 10:30:00	8.0407	6.219	6.04123	5.18407
2017-01-17 11:00:00	9.1779	5.93	5.44356	5.29456
2017-01-17 11:30:00	6.4657	6.532	5.65365	5.34868
2017-01-17 12:00:00	7.1835	5.912	5.35268	4.89769
2017-01-17 12:30:00	8.1784	5.563	5.23446	5.23367
2017-01-17 13:00:00	9.8254	5.985	5.08778	5.61927
2017-01-17 13:30:00	11.184	5.596	6.21519	6.01151
2017-01-17 14:00:00	11.631	5.903	6.79429	6.26559
2017-01-17 14:30:00	11.643	6.516	7.3308	6.59897
2017-01-17 15:00:00	10.795	8.31	6.8997	6.60663
2017-01-17 15:30:00	10.454	8.52	7.04118	6.80681
2017-01-17 16:00:00	10.165	8.07	6.92514	7.0547
2017-01-17 16:30:00	10.24	7.233	7.20272	7.11759
2017-01-17 17:00:00	9.8507	7.11	6.95508	6.3941
2017-01-17 17:30:00	8.9574	7.778	6.68348	6.27636
2017-01-17 18:00:00	8.4371	7.391	6.20861	6.13173
2017-01-17 18:30:00	8.3217	7.032	6.14717	6.24834
2017-01-17 19:00:00	8.5877	5.903	5.9044	6.09954
2017-01-17 19:30:00	7.7557	4.07	5.37334	5.54032
2017-01-17 20:00:00	6.2801	4.087	5.51288	5.31934
2017-01-17 20:30:00	7.3058	3.82	4.59578	5.43209
2017-01-17 21:00:00	6.808	4.092	4.48437	5.64405
2017-01-17 21:30:00	5.8612	4.31	4.73658	5.67562
2017-01-17 22:00:00	6.084	5.374	5.74316	6.02738
2017-01-17 22:30:00	5.2737	4.284	5.36408	6.47837
2017-01-17 23:00:00	4.6876	4.423	4.92218	6.64298
2017-01-17 23:30:00	3.8901	4.825	5.29033	6.62931
2017-01-18	2.787	5.069	4.95491	6.72627
2017-01-18 00:30:00	2.2399	5.075	5.10182	7.17231
2017-01-18 01:00:00	2.4027	4.855	4.76583	6.9575
2017-01-18 01:30:00	3.6303	4.503	4.91991	8.03501
2017-01-18 02:00:00	3.3902	3.823	4.71976	7.24616
2017-01-18 02:30:00	2.7981	3.225	5.85379	7.1928
2017-01-18 03:00:00	2.3264	2.317	5.89018	7.20939
2017-01-18 03:30:00	2.0818	3.225	5.87864	6.85656
2017-01-18 04:00:00	2.2555	3.863	5.98688	6.39204
2017-01-18 04:30:00	2.7171	5.831	5.9833	5.97542
2017-01-18 05:00:00	5.0787	5.038	5.62688	6.20552
2017-01-18 05:30:00	5.61	4.171	5.29409	5.95072
2017-01-18 06:00:00	5.47	4.323	5.32394	5.81993
2017-01-18 06:30:00	3.4218	4.285	5.41151	5.90562
2017-01-18 07:00:00	3.9241	4.284	4.90852	5.69366
2017-01-18 07:30:00	3.6444	2.888	4.48489	5.54258
2017-01-18 08:00:00	2.5874	2.752	4.54255	5.19758
2017-01-18 08:30:00	4.1489	2.969	4.82165	5.29003
2017-01-18 09:00:00	2.6115	3.288	4.64942	5.10287
2017-01-18 09:30:00	3.4245	3.944	4.33677	5.31934
2017-01-18 10:00:00	4.3843	4.407	4.58374	6.02288
2017-01-18 10:30:00	4.3986	3.815	4.28938	6.34082
2017-01-18 11:00:00	5.6846	4.887	4.17979	6.22807
2017-01-18 11:30:00	6.6215	5.239	5.00577	6.56857
2017-01-18 12:00:00	6.5188	6.001	6.13944	6.67875
2017-01-18 12:30:00	7.4308	5.948	7.36096	7.5712
2017-01-18 13:00:00	9.2456	6.264	7.72486	7.79708
2017-01-18 13:30:00	9.2523	6.116	8.52081	8.68026
2017-01-18 14:00:00	8.8132	5.862	9.0286	9.06326
2017-01-18 14:30:00	10.359	7.539	9.36518	9.22333
2017-01-18 15:00:00	10.275	7.228	9.16657	9.37213
2017-01-18 15:30:00	9.8464	8.26	9.08524	9.68982
2017-01-18 16:00:00	9.0883	8.36	9.37365	9.85657
2017-01-18 16:30:00	8.4761	7.97	9.11648	9.29088
2017-01-18 17:00:00	8.1053	6.956	8.3306	8.18621
2017-01-18 17:30:00	6.3495	7.081	7.59527	8.34628
2017-01-18 18:00:00	6.1649	5.489	7.25448	7.47377
2017-01-18 18:30:00	6.0524	5.728	6.12019	6.74836
2017-01-18 19:00:00	7.6098	6.095	5.42942	6.74932
2017-01-18 19:30:00	5.7381	5.086	5.08058	6.94665
2017-01-18 20:00:00	3.7491	3.867	5.25151	7.05237
2017-01-18 20:30:00	3.7203	3.196	4.90009	7.1287
2017-01-18 21:00:00	4.9829	3.204	5.08249	7.13689
2017-01-18 21:30:00	3.3993	5.281	4.75697	7.43009
2017-01-18 22:00:00	4.3885	5.676	5.09468	7.48213
2017-01-18 22:30:00	5.8364	5.76	4.79195	7.48125
2017-01-18 23:00:00	5.9494	4.732	4.0644	7.33586
2017-01-18 23:30:00	6.0876	4.733	4.38893	7.41028
2017-01-19	6.2651	4.859	5.27125	8.09048
2017-01-19 00:30:00	6.0983	5.229	3.57738	7.28671
2017-01-19 01:00:00	5.9981	5.854	3.62848	6.15971
2017-01-19 01:30:00	5.7752	3.87	3.97667	5.93935
2017-01-19 02:00:00	4.4827	2.51	3.91164	4.73081
2017-01-19 02:30:00	4.1251	2.46	3.69565	5.32385
2017-01-19 03:00:00	4.1433	3.526	3.25663	4.69247
2017-01-19 03:30:00	3.4839	4.733	3.67722	4.03629
2017-01-19 04:00:00	3.3028	4.481	4.67954	3.43874
2017-01-19 04:30:00	2.6686	3.836	4.27132	3.5357
2017-01-19 05:00:00	2.1483	4.046	4.32647	2.29324
2017-01-19 05:30:00	2.4656	3.414	4.61669	2.53226
2017-01-19 06:00:00	3.0204	2.758	4.20456	5.1412
2017-01-19 06:30:00	3.6643	2.63	3.11016	5.42081
2017-01-19 07:00:00	2.8858	2.301	3.76914	4.40384
2017-01-19 07:30:00	2.6552	2.786	3.62106	3.43197
2017-01-19 08:00:00	2.333	2.305	2.50472	3.19972
2017-01-19 08:30:00	2.5411	2.623	2.21754	3.42521
2017-01-19 09:00:00	2.9943	3.322	2.57302	4.591
2017-01-19 09:30:00	3.7238	3.476	1.97846	5.41405
2017-01-19 10:00:00	4.3482	4.249	2.25055	4.94953
2017-01-19 10:30:00	4.4534	4.911	2.7029	5.37797
2017-01-19 11:00:00	5.1359	4.208	2.5092	5.7365
2017-01-19 11:30:00	5.4448	4.747	2.77104	5.90111
2017-01-19 12:00:00	5.0133	5.755	3.58137	6.39945
2017-01-19 12:30:00	6.9073	5.733	4.62394	6.78729
2017-01-19 13:00:00	7.2704	5.985	4.14841	6.84764
2017-01-19 13:30:00	7.1891	6.194	5.45928	7.11776
2017-01-19 14:00:00	7.4211	6.425	5.56921	7.09946
2017-01-19 14:30:00	7.9274	6.049	6.32914	6.98447
2017-01-19 15:00:00	8.3295	6.12	6.38203	6.92459
2017-01-19 15:30:00	7.7629	6.658	6.30819	7.12795
2017-01-19 16:00:00	7.4809	7.266	6.23316	8.33087
2017-01-19 16:30:00	7.0181	7.087	6.81697	7.66094
2017-01-19 17:00:00	6.8398	6.719	7.1847	7.67672
2017-01-19 17:30:00	5.9646	5.591	6.24265	7.06574
2017-01-19 18:00:00	5.3057	5.088	5.72171	6.27219
2017-01-19 18:30:00	4.6694	6.018	4.36906	5.41396
2017-01-19 19:00:00	4.4254	5.526	4.09103	4.9112
2017-01-19 19:30:00	3.9062	4.246	5.24081	4.46247
2017-01-19 20:00:00	2.9278	3.445	4.95516	4.43767
2017-01-19 20:30:00	2.6222	3.552	5.05615	4.29561
2017-01-19 21:00:00	2.8391	2.209	4.22145	4.30463
2017-01-19 21:30:00	2.6747	2.469	3.94019	4.12649
2017-01-19 22:00:00	2.153	2.203	3.58787	4.07237
2017-01-19 22:30:00	1.6501	2.021	3.86362	4.08816
2017-01-19 23:00:00	1.2406	1.481	3.97761	3.96188
2017-01-19 23:30:00	2.3413	1.123	4.6587	3.13658
2017-01-20	2.1086	0.372	4.19127	3.30344
2017-01-20 00:30:00	1.3066	-0.549	3.99114	3.29442
2017-01-20 01:00:00	-0.45627	0.071	3.68346	2.99678
2017-01-20 01:30:00	-1.0031	0.848	3.32629	3.1456
2017-01-20 02:00:00	-1.3691	0.81	3.07722	3.24256
2017-01-20 02:30:00	0.50746	-0.776	2.29015	2.86599
2017-01-20 03:00:00	1.5782	-1.225	2.1561	2.30226
2017-01-20 03:30:00	1.9959	-1.294	1.97266	2.44432
2017-01-20 04:00:00	1.8358	-1.617	1.4791	2.0452
2017-01-20 04:30:00	1.177	-1.21	0.706363	1.5198
2017-01-20 05:00:00	0.6536	-1.627	0.738891	0.836564
2017-01-20 05:30:00	0.34585	-3.209	1.79948	0.604439
2017-01-20 06:00:00	0.03245	-3.569	1.44483	0.333851
2017-01-20 06:30:00	0.0817	-3.746	1.27264	0.39731
2017-01-20 07:00:00	0.31787	-4.182	1.32547	-0.259618
2017-01-20 07:30:00	0.15445	-4.499	0.648924	-0.400943
2017-01-20 08:00:00	-0.15784	-5.073	-0.643429	-0.118992
2017-01-20 08:30:00	-0.3526	-6.406	-0.960731	-0.861594
2017-01-20 09:00:00	-0.6425	-6.533	-1.45238	-1.4564
2017-01-20 09:30:00	-1.0691	-6.542	-1.84371	-1.38757
2017-01-20 10:00:00	-0.52339	-6.083	-1.56187	-1.61959
2017-01-20 10:30:00	0.17543	-4.572	-1.05968	0.543226
2017-01-20 11:00:00	0.81299	-4.415	0.472224	1.96437
2017-01-20 11:30:00	1.5265	-3.219	1.40363	3.17047
2017-01-20 12:00:00	2.2137	-1.66	2.16665	4.41965
2017-01-20 12:30:00	2.441	-0.926	2.92181	5.10063
2017-01-20 13:00:00	2.8633	0.325	3.75568	5.42309
2017-01-20 13:30:00	3.1649	3.061	4.14611	6.0003
2017-01-20 14:00:00	3.4941	3.787	4.22763	6.44652
2017-01-20 14:30:00	3.9611	4.217	4.1371	6.68502
2017-01-20 15:00:00	4.1915	4.117	4.5164	6.97556
2017-01-20 15:30:00	4.2701	3.805	4.54911	7.21228
2017-01-20 16:00:00	4.47	2.621	4.35949	7.23258
2017-01-20 16:30:00	4.3405	2.509	4.13147	7.11985
2017-01-20 17:00:00	4.2275	2.679	3.98914	6.87185
2017-01-20 17:30:00	2.74	2.451	2.88506	5.79696
2017-01-20 18:00:00	1.3766	1.704	0.234209	3.97864
2017-01-20 18:30:00	0.30021	0.843	-1.23093	1.97079
2017-01-20 19:00:00	-1.266	-0.259	-2.49158	1.34167
2017-01-20 19:30:00	-3.0699	-0.47	-2.12483	-0.37345
2017-01-20 20:00:00	-3.5062	-1.402	-2.06372	-2.95738
2017-01-20 20:30:00	-4.3919	-2.178	-2.097	-4.05121
2017-01-20 21:00:00	-5.3702	-2.141	-1.75036	-4.46118
2017-01-20 21:30:00	-5.4752	-2.96	-0.937027	-4.23705
2017-01-20 22:00:00	-5.5892	-4.855	-1.20679	-3.2871
2017-01-20 22:30:00	-5.1434	-5.184	-4.09138	-4.8122
2017-01-20 23:00:00	-5.8311	-4.772	-3.03876	-5.19121
2017-01-20 23:30:00	-6.1783	-4.643	-2.63696	-4.42648
2017-01-21	-5.1602	-4.673	-2.04812	-4.95208
2017-01-21 00:30:00	-5.7523	-4.819	-3.34407	-4.99494
2017-01-21 01:00:00	-4.8257	-5.037	-4.41835	-6.02605
2017-01-21 01:30:00	-4.3604	-5.46	-5.49012	-6.75918
2017-01-21 02:00:00	-4.2753	-5.398	-6.19209	-7.90751
2017-01-21 02:30:00	-4.6438	-6.26	-6.36814	-7.9594
2017-01-21 03:00:00	-4.4624	-6.271	-7.27992	-7.77666
2017-01-21 03:30:00	-4.6931	-5.833	-5.94258	-8.52793
2017-01-21 04:00:00	-5.0739	-5.969	-6.31205	-8.10813
2017-01-21 04:30:00	-5.3573	-6.342	-6.21581	-9.21057
2017-01-21 05:00:00	-5.5063	-5.89	-6.59314	-9.75997
2017-01-21 05:30:00	-5.662	-6.883	-6.19709	-8.82667
2017-01-21 06:00:00	-6.203	-8.16	-6.31982	-8.85434
2017-01-21 06:30:00	-6.9904	-6.956	-7.1717	-8.64242
2017-01-21 07:00:00	-6.8324	-7.457	-7.40002	-8.36238
2017-01-21 07:30:00	-6.8342	-7.163	-7.279	-8.83632
2017-01-21 08:00:00	-6.9483	-7.991	-7.49216	-8.45531
2017-01-21 08:30:00	-7.3483	-8.53	-7.26746	-8.75342
2017-01-21 09:00:00	-7.6329	-9.04	-6.93446	-10.0797
2017-01-21 09:30:00	-7.6281	-9.11	-8.13416	-10.4474
2017-01-21 10:00:00	-7.0981	-9.02	-7.44409	-9.43727
2017-01-21 10:30:00	-5.9581	-8.69	-7.11801	-8.26155
2017-01-21 11:00:00	-4.7405	-8.11	-6.74927	-6.42971
2017-01-21 11:30:00	-3.6787	-7.442	-6.79382	-5.33332
2017-01-21 12:00:00	-2.8069	-6.737	-6.81059	-3.75524
2017-01-21 12:30:00	-1.4747	-6.333	-6.53691	-2.55794
2017-01-21 13:00:00	-0.99545	-5.64	-6.12252	-1.14605
2017-01-21 13:30:00	-0.49104	-5.058	-5.60699	0.960766
2017-01-21 14:00:00	0.04351	-4.414	-4.93203	2.20091
2017-01-21 14:30:00	0.68307	-3.967	-4.39321	2.5616
2017-01-21 15:00:00	1.1283	-3.314	-3.7309	2.3113
2017-01-21 15:30:00	1.5893	-3.202		1.84904
2017-01-21 16:00:00	0.63852	-3.164		2.62022
2017-01-21 16:30:00	0.40655	-3.112		2.14218
2017-01-21 17:00:00	-0.22244	-3.571		1.96855
2017-01-21 17:30:00	-1.1857	-3.87		0.173636
2017-01-21 18:00:00	-2.6353	-4.33		-2.26233
2017-01-21 18:30:00	-3.767	-4.191		-3.71559
2017-01-21 19:00:00	-4.6874	-4.361		-4.75498
2017-01-21 19:30:00	-5.1097	-4.694		-5.02334
2017-01-21 20:00:00	-6.2744	-4.649		-4.5771
2017-01-21 20:30:00	-5.3867	-4.603		-4.62148
2017-01-21 21:00:00	-4.7901	-4.294		-3.96899
2017-01-21 21:30:00	-4.5802	-4.288		-3.28201
2017-01-21 22:00:00	-4.7234	-4.537		-2.71132
2017-01-21 22:30:00	-4.7341	-4.833		-1.99176
2017-01-21 23:00:00	-4.7957	-5.529		-2.00529
2017-01-21 23:30:00	-4.752	-5.971		-2.34816
2017-01-22	-4.8371	-6.218		-2.47448
2017-01-22 00:30:00	-5.0812	-6.308		-2.95945
2017-01-22 01:00:00	-5.519	-6.371		-3.89781
2017-01-22 01:30:00	-6.0262	-6.512		-4.89933
2017-01-22 02:00:00	-6.176	-6.47		-3.90232
2017-01-22 02:30:00	-6.3672	-6.358		-3.57525
2017-01-22 03:00:00	-6.604	-6.402		-4.19105
2017-01-22 03:30:00	-6.7678	-6.416		-4.27
2017-01-22 04:00:00	-6.9273	-6.351		-4.09857
2017-01-22 04:30:00	-7.1441	-6.411		-4.02187
2017-01-22 05:00:00	-7.1604	-6.491		-4.0106
2017-01-22 05:30:00	-7.2698	-6.53		-4.04443
2017-01-22 06:00:00	-7.3074	-6.677		-4.07375
2017-01-22 06:30:00	-7.3421	-6.884		-4.20684
2017-01-22 07:00:00	-7.1998	-7.144		-4.31737
2017-01-22 07:30:00	-7.1954	-7.183		-4.2903
2017-01-22 08:00:00	-7.0229	-7.186		-4.43241
2017-01-22 08:30:00	-6.8605	-7.276		-4.39857
2017-01-22 09:00:00	-6.8672	-7.452		-4.38053
2017-01-22 09:30:00	-6.968	-7.65		-4.38278
2017-01-22 10:00:00	-6.9243	-7.83		-4.37827
2017-01-22 10:30:00	-6.9747	-7.906		-4.2903
2017-01-22 11:00:00	-6.8809	-7.808		-4.28353
2017-01-22 11:30:00	-6.6459	-7.751		-4.32414
2017-01-22 12:00:00	-6.5367	-7.685		-4.13917
2017-01-22 12:30:00	-6.3539	-7.516		-4.06699
2017-01-22 13:00:00	-6.1111	-7.292		-4.00383
2017-01-22 13:30:00	-6.2163	-7.16		-3.90232
2017-01-22 14:00:00	-6.3565	-7.1		-3.88653
2017-01-22 14:30:00	-6.3151	-6.982		-3.97225
2017-01-22 15:00:00	-6.3532	-6.835		-4.09857
2017-01-22 15:30:00	-6.2255	-6.724		-4.00157
2017-01-22 16:00:00	-6.3834	-6.677		-3.96999
2017-01-22 16:30:00	-6.4159	-6.726		-4.08052
2017-01-22 17:00:00	-6.4114	-6.854		-4.08052
2017-01-22 17:30:00	-6.618	-6.818		-3.94292
2017-01-22 18:00:00	-6.9156	-6.918		-4.00157
2017-01-22 18:30:00	-7.1607	-6.969		-3.94292
2017-01-22 19:00:00	-7.1342	-7.016		-4.04669
2017-01-22 19:30:00	-7.0176	-7.091		-4.08954
2017-01-22 20:00:00	-6.8661	-7.185		-4.30835
2017-01-22 20:30:00	-6.9333	-7.301		-4.46624
2017-01-22 21:00:00	-7.3488	-7.251		-4.46399
2017-01-22 21:30:00	-7.3309	-7.214		-4.56549
2017-01-22 22:00:00	-7.1349	-7.235		-4.75948
2017-01-22 22:30:00	-6.9949	-7.169		-5.11588
2017-01-22 23:00:00	-6.8056	-7.221		-5.3437
2017-01-22 23:30:00	-6.7977	-7.319		-5.52416
2017-01-23	-6.7641	-7.277		-5.48581
2017-01-23 00:30:00	-6.7787	-7.347		-5.33694
2017-01-23 01:00:00	-6.8728	-7.534		-5.26927
2017-01-23 01:30:00	-7.0531	-7.572		-5.1722
2017-01-23 02:00:00	-7.2536	-7.568		-5.16092
2017-01-23 02:30:00	-7.2928	-7.612		-5.14069
2017-01-23 03:00:00	-7.0498	-7.919		-5.21496
2017-01-23 03:30:00	-6.8291	-8.21		-5.18343
2017-01-23 04:00:00	-7.033	-8.39		-5.22408
2017-01-23 04:30:00	-7.4015	-8.45		-5.30085
2017-01-23 05:00:00	-7.8472	-8.63		-5.2828
2017-01-23 05:30:00	-7.9492	-8.77		-5.6593
2017-01-23 06:00:00	-7.7921	-8.84		-6.06708
2017-01-23 06:30:00	-7.6703	-8.83		-6.39809
2017-01-23 07:00:00	-7.5739	-8.81		-6.52025
2017-01-23 07:30:00	-7.5549	-8.76		-6.54034
2017-01-23 08:00:00	-7.6445	-8.77		-6.58772
2017-01-23 08:30:00	-7.6053	-8.82		-6.59674
2017-01-23 09:00:00	-7.5739	-8.92		-6.59448
2017-01-23 09:30:00	-7.6042	-8.81		-6.64637
2017-01-23 10:00:00	-7.6759	-8.74		-6.53583
2017-01-23 10:30:00	-7.7498	-8.65		-6.49522
2017-01-23 11:00:00	-7.6031	-8.4		-6.36437
2017-01-23 11:30:00	-7.3734	-8.19		-6.20885
2017-01-23 12:00:00	-6.8112	-7.947		-5.72406
2017-01-23 12:30:00	-6.0551	-7.663		-5.19329
2017-01-23 13:00:00	-5.3571	-7.257		-4.92415
2017-01-23 13:30:00	-4.105	-6.629		-4.57452
2017-01-23 14:00:00	-2.5888	-6.516		-4.1933
2017-01-23 14:30:00	-2.9028	-6.539		-3.88428
2017-01-23 15:00:00	-3.3029	-6.22		-3.72412
2017-01-23 15:30:00	-3.7956	-6.021		-3.10155
2017-01-23 16:00:00	-3.9669	-5.889		-3.16471
2017-01-23 16:30:00	-4.1415	-5.973		-3.0634
2017-01-23 17:00:00	-4.4757	-6.025		-3.41972
2017-01-23 17:30:00	-4.8354	-6.177		-3.71286
2017-01-23 18:00:00	-5.1537	-6.266		-3.75346
2017-01-23 18:30:00	-5.3836	-6.332		-4.31287
2017-01-23 19:00:00	-5.8571	-6.358		-4.69408
2017-01-23 19:30:00	-5.9937	-6.504		-5.14522
2017-01-23 20:00:00	-6.0665	-6.732		-5.78875
2017-01-23 20:30:00	-6.3003	-6.846		-5.91356
2017-01-23 21:00:00	-6.4017	-6.877		-6.38241
2017-01-23 21:30:00	-6.4734	-6.96		-6.79302
2017-01-23 22:00:00	-6.6792	-6.962		-6.75918
2017-01-23 22:30:00	-6.7888	-6.966		-7.23521
2017-01-23 23:00:00	-6.8113	-7.046		-7.29161
2017-01-23 23:30:00	-6.9501	-7.148		-7.29838
2017-01-24	-7.0027	-7.186		-7.40667
2017-01-24 00:30:00	-7.1214	-7.249		-7.91428
2017-01-24 01:00:00	-7.2323	-7.233		-8.03836
2017-01-24 01:30:00	-7.0755	-7.111		-8.16245
2017-01-24 02:00:00	-6.8683	-7.169		-8.16019
2017-01-24 02:30:00	-6.7608	-7.253		-8.32263
2017-01-24 03:00:00	-6.6656	-7.3		-8.2572
2017-01-24 03:30:00	-6.6812	-7.454		-8.40385
2017-01-24 04:00:00	-7.08	-7.765		-8.76482
2017-01-24 04:30:00	-8.1306	-7.872		-8.86183
2017-01-24 05:00:00	-9.5503	-7.975		-8.5911
2017-01-24 05:30:00	-9.5402	-8.11		-8.51214
2017-01-24 06:00:00	-10.134	-8.31		-8.41738
2017-01-24 06:30:00	-9.6706	-8.25		-8.43092
2017-01-24 07:00:00	-8.4101	-8.48		-8.11733
2017-01-24 07:30:00	-7.2717	-8.75		-7.97068
2017-01-24 08:00:00	-7.179	-8.72		-7.91428
2017-01-24 08:30:00	-7.0412	-8.62		-7.97971
2017-01-24 09:00:00	-6.9085	-8.42		-8.03836
2017-01-24 09:30:00	-6.838	-8.3		-8.63848
2017-01-24 10:00:00	-6.4819	-8.17		-9.88382
2017-01-24 10:30:00	-5.9711	-8.03		-10.1948
2017-01-24 11:00:00	-5.4167	-7.786		-7.95786
2017-01-24 11:30:00	-4.9539	-7.463		-7.43823
2017-01-24 12:00:00	-4.1481	-6.914		-7.08854
2017-01-24 12:30:00	-3.657	-6.417		-6.43428
2017-01-24 13:00:00	-3.032	-5.731		-5.47713
2017-01-24 13:30:00	-2.7556	-5.083		-4.46171
2017-01-24 14:00:00	-2.2881	-4.712		-2.90982
2017-01-24 14:30:00	-1.1412	-4.702		-1.07117
2017-01-24 15:00:00	-1.1914	-4.416		0.796548
2017-01-24 15:30:00	-1.6666	-4.18		1.5311
2017-01-24 16:00:00	-1.4439	-4.046		1.61678
2017-01-24 16:30:00	-1.5861	-4.006		0.947074
2017-01-24 17:00:00	-2.0025	-3.983		-0.193915
2017-01-24 17:30:00	-2.1457	-4.124		-1.22645
2017-01-24 18:00:00	-2.6785	-4.528		-2.21099
2017-01-24 18:30:00	-3.5641	-4.964		-3.00291
2017-01-24 19:00:00	-4.2796	-5.234		-3.16924
2017-01-24 19:30:00	-5.2351	-5.317		-3.97001
2017-01-24 20:00:00	-5.862	-5.295		-4.16174
2017-01-24 20:30:00	-6.0695	-5.614		-4.14575
2017-01-24 21:00:00	-5.3577	-6.126		-4.58047
2017-01-24 21:30:00	-4.9306	-6.165		-5.10322
2017-01-24 22:00:00	-4.6436	-5.379		-4.98646
2017-01-24 22:30:00	-4.5597	-5.832		-5.27018
2017-01-24 23:00:00	-4.4928	-6.003		-6.25833
2017-01-24 23:30:00	-4.3239	-6.446		-6.35985
2017-01-25	-4.0444	-6.718		-6.38918
2017-01-25 00:30:00	-4.1093	-7.06		-6.04852
2017-01-25 01:00:00	-3.8435	-6.438		-6.01242
2017-01-25 01:30:00	-3.8887	-6.706		-5.89962
2017-01-25 02:00:00	-3.8226	-6.764		-5.96956
2017-01-25 02:30:00	-3.948	-6.723		-6.51327
2017-01-25 03:00:00	-3.5528	-6.632		-6.0034
2017-01-25 03:30:00	-3.3322	-6.636		-6.31924
2017-01-25 04:00:00	-3.6536	-6.7		-6.79753
2017-01-25 04:30:00	-3.5192	-6.839		-7.04795
2017-01-25 05:00:00	-3.6099	-6.652		-7.1224
2017-01-25 05:30:00	-3.9458	-6.495	-5.57268	-7.84209
2017-01-25 06:00:00	-3.8753	-6.478	-6.26956	-9.06939
2017-01-25 06:30:00	-4.0208	-6.619	-6.57748	-9.22823
2017-01-25 07:00:00	-4.2896	-7.732	-5.56034	-8.25733
2017-01-25 07:30:00	-4.6893	-8.06	-5.61299	-8.68138
2017-01-25 08:00:00	-4.9261	-8.48	-5.41169	-10.0936
2017-01-25 08:30:00	-5.2499	-8.97	-5.57707	-10.6646
2017-01-25 09:00:00	-5.4332	-9.33	-6.00487	-9.7867
2017-01-25 09:30:00	-5.9022	-9.9	-6.2655	-10.4616
2017-01-25 10:00:00	-6.2762	-9.9	-6.11554	-9.84951
2017-01-25 10:30:00	-6.0742	-9.25	-5.54079	-7.99236
2017-01-25 11:00:00	-4.9171	-8.51	-4.83518	-5.37593
2017-01-25 11:30:00	-4.2289	-7.354	-4.46756	-3.7722
2017-01-25 12:00:00	-3.595	-6.515	-4.83202	-2.09738
2017-01-25 12:30:00	-2.8664	-5.823	-6.17724	-1.3129
2017-01-25 13:00:00	-2.2816	-5.648	-6.2794	-0.630208
2017-01-25 13:30:00	-1.7337	-4.978	-4.82921	0.302206
2017-01-25 14:00:00	-1.0814	-4.296	-4.29066	0.78472
2017-01-25 14:30:00	-0.80428	-3.877	-4.20715	1.45894
2017-01-25 15:00:00	-0.31236	-3.604	-3.80022	2.6112
2017-01-25 15:30:00	0.00355	-2.807	-3.08812	2.24816
2017-01-25 16:00:00	0.08638	-2.133	-2.73759	2.74424
2017-01-25 16:30:00	0.07936	-1.632	-2.49013	3.0667
2017-01-25 17:00:00	-0.26132	-1.47	-2.73417	2.11738
2017-01-25 17:30:00	-0.84741	-1.68	-3.47992	0.19844
2017-01-25 18:00:00	-1.6911	-2.372	-4.78884	-0.75539
2017-01-25 18:30:00	-2.7615	-3.958	-7.41595	-2.08996
2017-01-25 19:00:00	-3.3663	-4.893	-9.41222	-3.75341
2017-01-25 19:30:00	-3.6081	-5.624	-10.0275	-3.65647
2017-01-25 20:00:00	-3.4589	-6.247	-10.1848	-4.4031
2017-01-25 20:30:00	-3.8921	-6.52	-9.10475	-6.42994
2017-01-25 21:00:00	-4.4295	-6.736	-9.50934	-8.55951
2017-01-25 21:30:00	-4.3606	-6.662	-9.56597	-9.01524
2017-01-25 22:00:00	-4.3613	-6.842	-8.75419	-9.65304
2017-01-25 22:30:00	-4.2057	-7.512	-9.30008	-9.24566
2017-01-25 23:00:00	-4.1264	-8.8	-9.07347	-9.55434
2017-01-25 23:30:00	-4.3048	-9.17	-8.28959	-9.75922
2017-01-26	-4.3996	-9.47	-9.23289	-10.0116
2017-01-26 00:30:00	-4.5874	-9.84	-8.1688	-10.3078
2017-01-26 01:00:00	-4.746	-9.74	-7.31319	-9.69381
2017-01-26 01:30:00	-5.0004	-9.76	-6.74542	-9.73838
2017-01-26 02:00:00	-5.221	-9.81	-5.35486	-9.7835
2017-01-26 02:30:00	-5.2898	-8.94	-5.76718	-10.1221
2017-01-26 03:00:00	-5.3026	-7.252	-5.90027	-10.3929
2017-01-26 03:30:00	-5.3125	-7.304	-6.46811	-10.0995
2017-01-26 04:00:00	-5.4312	-8.19	-6.41839	-10.0972
2017-01-26 04:30:00	-5.5556	-7.795	-6.39153	-10.5981
2017-01-26 05:00:00	-5.3887	-7.367	-6.61672	-9.66822
2017-01-26 05:30:00	-5.3215	-7.226	-5.82595	-10.1122
2017-01-26 06:00:00	-5.6183	-6.917	-5.53216	-10.4707
2017-01-26 06:30:00	-5.4895	-6.418	-4.99129	-9.75527
2017-01-26 07:00:00	-5.5623	-6.326	-5.70909	-9.54355
2017-01-26 07:30:00	-5.4996	-7.251	-5.3086	-9.40251
2017-01-26 08:00:00	-5.4671	-7.1	-5.56229	-8.3136
2017-01-26 08:30:00	-5.5007	-7.644	-5.69482	-8.53029
2017-01-26 09:00:00	-5.6273	-7.327	-5.48538	-8.52011
2017-01-26 09:30:00	-5.4503	-7.872	-5.72367	-8.52982
2017-01-26 10:00:00	-5.3618	-7.05	-5.26484	-7.2847
2017-01-26 10:30:00	-4.7833	-6.308	-4.48639	-6.25379
2017-01-26 11:00:00	-3.4977	-5.295	-3.91778	-4.51437
2017-01-26 11:30:00	-3.0438	-4.158	-2.38352	-2.13467
2017-01-26 12:00:00	-2.531	-2.791	-1.67217	-0.155635
2017-01-26 12:30:00	-1.6641	-1.664	-0.763444	2.20253
2017-01-26 13:00:00	-1.0497	-0.731	0.14042	3.72515
2017-01-26 13:30:00	-0.3085	0.456	0.808766	5.17505
2017-01-26 14:00:00	0.67282	1.514	1.42444	5.63054
2017-01-26 14:30:00	1.1134	2.04	1.86033	6.21451
2017-01-26 15:00:00	1.7959	2.156	2.19271	6.60319
2017-01-26 15:30:00	2.734	2.439	2.5827	6.75193
2017-01-26 16:00:00	3.1831	2.621	2.91749	6.67678
2017-01-26 16:30:00	3.2681	2.731	2.96637	6.6287
2017-01-26 17:00:00	2.9991	2.798	2.61891	6.5788
2017-01-26 17:30:00	2.9463	2.268	1.97531	4.65737
2017-01-26 18:00:00	3.1325	1.114	0.578845	2.8861
2017-01-26 18:30:00	0.0528	0.719	-0.563834	0.588523
2017-01-26 19:00:00	-1.718	0.772	-0.639548	-0.669721
2017-01-26 19:30:00	-3.114	-0.214	-0.598292	-1.43847
2017-01-26 20:00:00	-2.9743	-0.65	-0.849944	-2.08767
2017-01-26 20:30:00	-2.8657	-1.117	-1.13807	-1.99186
2017-01-26 21:00:00	-3.3961	-1.639	-1.68222	-1.75042
2017-01-26 21:30:00	-2.2439	-2.107	-1.78587	-1.78877
2017-01-26 22:00:00	-1.7882	-2.796	-2.22987	-2.15419
2017-01-26 22:30:00	-1.9505	-2.07	-0.534403	-2.37524
2017-01-26 23:00:00	-2.1588	-2.535	-0.572793	-2.30532
2017-01-26 23:30:00	-2.0211	-4.276	-0.576469	-2.15193
2017-01-27	-1.8139	-4.979	-0.411169	-2.31208
2017-01-27 00:30:00	-0.78044	-4.514	-0.234908	-2.49705
2017-01-27 01:00:00	-0.75343	-3.446	-0.335226	-2.6978
2017-01-27 01:30:00	-0.75337	-4.564	-0.734506	-2.21058
2017-01-27 02:00:00	-1.1116	-5.978	-1.2701	-2.3008
2017-01-27 02:30:00	-1.1833	-5.335	-1.28717	-2.61886
2017-01-27 03:00:00	-1.1934	-5.217	-2.63355	-4.41212
2017-01-27 03:30:00	-1.4419	-4.495	-1.69481	-5.29854
2017-01-27 04:00:00	-1.4195	-4.251	-1.80951	-5.38932
2017-01-27 04:30:00	-1.5953	-4.591	-1.91366	-4.33165
2017-01-27 05:00:00	-1.6513	-3.714	-1.79608	-6.5268
2017-01-27 05:30:00	-1.911	-4.253	-3.223	-4.43543
2017-01-27 06:00:00	-1.7834	-3.175	-2.46427	-3.37549
2017-01-27 06:30:00	-1.8864	-3.436	-3.09328	-3.46631
2017-01-27 07:00:00	-1.9842	-5.152	-2.60727	-3.32938
2017-01-27 07:30:00	-1.7084	-5.13	-2.40618	-3.6948
2017-01-27 08:00:00	-1.8986	-5.105	-3.05472	-3.39028
2017-01-27 08:30:00	-1.2516	-7.177	-2.85304	-3.12862
2017-01-27 09:00:00	-1.2057	-6.763	-2.22155	-2.46771
2017-01-27 09:30:00	-1.3562	-6.546	-2.80343	-2.48575
2017-01-27 10:00:00	-1.306	-5.862	-2.55429	-1.8271
2017-01-27 10:30:00	-1.6384	-4.692	-1.54821	-0.681209
2017-01-27 11:00:00	-1.595	-3.597	-1.17119	0.822147
2017-01-27 11:30:00	-0.6548	-3.087	-0.168031	1.98964
2017-01-27 12:00:00	0.24289	-3.275	1.19655	2.75552
2017-01-27 12:30:00	1.4047	-1.658	1.53579	3.37788
2017-01-27 13:00:00	3.2683	-1.077	2.88531	4.40837
2017-01-27 13:30:00	4.6588	-0.985	3.35518	5.28328
2017-01-27 14:00:00	5.4573	-0.551	3.28144	4.63837
2017-01-27 14:30:00	5.385	0.761	2.84978	5.1525
2017-01-27 15:00:00	4.942	0.604	3.88129	5.63493
2017-01-27 15:30:00	4.991	0.901	4.55184	6.38833
2017-01-27 16:00:00	5.3702	1.05	4.63119	5.02621
2017-01-27 16:30:00	5.0257	0.468	4.3121	4.4462
2017-01-27 17:00:00	4.934	-0.138	4.0383	3.82433
2017-01-27 17:30:00	4.5061	-0.179	3.78362	3.38688
2017-01-27 18:00:00	4.1666	-0.677	3.81661	2.97648
2017-01-27 18:30:00	3.8662	-0.559	3.68058	3.47256
2017-01-27 19:00:00	3.4491	-0.729	3.51789	2.62246
2017-01-27 19:30:00	3.0899	-1.533	3.35709	1.94824
2017-01-27 20:00:00	2.76	-0.338	3.18641	2.00236
2017-01-27 20:30:00	2.5802	1.113	2.85797	1.69118
2017-01-27 21:00:00	2.5165	0.874	2.86937	1.65961
2017-01-27 21:30:00	2.6205	0.088	2.97353	2.09932
2017-01-27 22:00:00	2.5903	0.457	3.28574	2.53001
2017-01-27 22:30:00	2.8824	1.433	3.43622	2.16471
2017-01-27 23:00:00	3.1744	1.563	3.038	2.53903
2017-01-27 23:30:00	4.2497	1.427	2.71686	3.09825
2017-01-28	4.4578	1.047	2.67151	1.6303
2017-01-28 00:30:00	4.215	1.349	2.68235	0.827544
2017-01-28 01:00:00	4.1865	1.466	2.5661	1.70245
2017-01-28 01:30:00	4.3039	1.582	2.88657	2.73746
2017-01-28 02:00:00	3.9888	2.447	3.04399	3.32148
2017-01-28 02:30:00	4.3117	1.785	3.26573	3.18619
2017-01-28 03:00:00	4.3969	-0.199	2.41187	3.01031
2017-01-28 03:30:00	4.2261	-0.32	2.13683	3.27864
2017-01-28 04:00:00	4.0179	-0.337	3.34266	2.7555
2017-01-28 04:30:00	3.8929	-0.371	3.54971	2.19402
2017-01-28 05:00:00	3.9128	-0.419	3.44126	2.31353
2017-01-28 05:30:00	4.0114	0.82	2.93017	2.3203
2017-01-28 06:00:00	4.0808	-1.456	3.13159	2.15795
2017-01-28 06:30:00	4.1345	-3.5	3.05066	2.0903
2017-01-28 07:00:00	4.1727	-2.456	2.76388	2.19177
2017-01-28 07:30:00	3.6847	-4.151	2.43881	2.94942
2017-01-28 08:00:00	4.1668	-2.561	3.19116	3.72737
2017-01-28 08:30:00	4.3415	-1.424	3.51694	4.94052
2017-01-28 09:00:00	4.3409	-1.353	3.02413	3.61011
2017-01-28 09:30:00	4.8558	-1.134	2.9528	4.25051
2017-01-28 10:00:00	5.4053	-3.927	3.41565	4.38806
2017-01-28 10:30:00	6.0124	-0.808	4.20749	4.54139
2017-01-28 11:00:00	6.2896	-1.329	5.38001	5.55836
2017-01-28 11:30:00	7.2249	1.026	6.53212	5.54483
2017-01-28 12:00:00	7.721	0.883	7.02456	5.73425
2017-01-28 12:30:00	8.2376	5.059	7.73291	5.54934
2017-01-28 13:00:00	8.9485	6.848	8.44276	7.32813
2017-01-28 13:30:00	9.0338	7.884	8.69521	7.35775
2017-01-28 14:00:00	9.0055	7.854	9.80761	7.79238
2017-01-28 14:30:00	8.8742	6.724	10.6606	8.47257
2017-01-28 15:00:00	8.6363	7.868	10.9288	11.2186
2017-01-28 15:30:00	8.4244	8.07	11.3902	8.56952
2017-01-28 16:00:00	8.3977	9.58	10.6642	7.31148
2017-01-28 16:30:00	8.4415	8.8	9.91868	6.86283
2017-01-28 17:00:00	8.4639	8.93	9.70799	6.99542
2017-01-28 17:30:00	8.427	8.64	8.80697	6.85749
2017-01-28 18:00:00	8.1977	8.2	8.38952	6.82766
2017-01-28 18:30:00	7.9528	7.188	8.3293	6.95435
2017-01-28 19:00:00	7.832	7.009	8.8199	6.43221
2017-01-28 19:30:00	7.6374	6.482	8.96228	6.24141
2017-01-28 20:00:00	6.9557	6.686	8.65642	5.96637
2017-01-28 20:30:00	5.9941	5.592	8.34577	5.42307
2017-01-28 21:00:00	6.0736	4.626	7.38573	5.01042
2017-01-28 21:30:00	6.321	3.742	7.75561	5.05326
2017-01-28 22:00:00	7.0905	4.845	7.82048	5.27875
2017-01-28 22:30:00	6.8298	4.594	7.33891	5.32611
2017-01-28 23:00:00	6.5449	2.319	7.01801	5.52228
2017-01-28 23:30:00	6.4407	2.806	5.75354	5.50424
2017-01-29	6.5666	1.79	5.35807	5.30807
2017-01-29 00:30:00	6.7214	4.22	4.77798	5.39826
2017-01-29 01:00:00	6.7106	1.937	5.10598	5.08934
2017-01-29 01:30:00	6.1109	1.932	4.59914	4.65639
2017-01-29 02:00:00	5.7363	4.521	4.64445	4.1761
2017-01-29 02:30:00	5.2949	-0.728	4.29483	4.12875
2017-01-29 03:00:00	6.1218	-0.889	4.82094	4.24375
2017-01-29 03:30:00	6.4932	-0.588	5.04275	4.37002
2017-01-29 04:00:00	6.7354	1.931	5.08721	4.40384
2017-01-29 04:30:00	6.7053	4.194	4.74756	4.11747
2017-01-29 05:00:00	6.0571	3.549	5.49117	3.80629
2017-01-29 05:30:00	6.5429	3.733	6.04567	3.8311
2017-01-29 06:00:00	5.9632	3.879	7.59726	3.44776
2017-01-29 06:30:00	6.6595	4.222	7.65145	3.13433
2017-01-29 07:00:00	7.0358	5.281	8.05991	2.62246
2017-01-29 07:30:00	6.5044	5.286	8.07583	2.60668
2017-01-29 08:00:00	5.9716	5.242	8.43175	2.40373
2017-01-29 08:30:00	6.5555	5.183	7.78296	2.20079
2017-01-29 09:00:00	7.7581	4.792	8.22369	2.77354
2017-01-29 09:30:00	7.6562	5.091	8.21345	3.22678
2017-01-29 10:00:00	7.687	2.809	8.68698	4.06786
2017-01-29 10:30:00	8.0257	4.098	8.77631	4.82551
2017-01-29 11:00:00	8.5031	3.748	9.56747	6.07699
2017-01-29 11:30:00	8.8361	4.731	10.6436	7.65093
2017-01-29 12:00:00	9.1719	4.702	10.9199	9.52444
2017-01-29 12:30:00	10.445	5.428	9.24872	10.6482
2017-01-29 13:00:00	11.101	7.178	10.0434	11.7145
2017-01-29 13:30:00	11.002	9.01	10.8248	12.3021
2017-01-29 14:00:00	10.906	9.63	9.37532	12.6742
2017-01-29 14:30:00	10.484	10.21	11.1522	12.668
2017-01-29 15:00:00	10.172	10.77	12.4977	13.0742
2017-01-29 15:30:00	9.9591	11.44	10.3247	13.6019
2017-01-29 16:00:00	10.168	10.04	11.824	12.9963
2017-01-29 16:30:00	10.736	9	11.7703	12.5615
2017-01-29 17:00:00	10.364	9.42	10.356	11.4603
2017-01-29 17:30:00	9.2986	7.94	9.83249	10.6178
2017-01-29 18:00:00	8.1163	8.12	9.07001	9.68545
2017-01-29 18:30:00	7.1515	7.132	10.0237	8.83101
2017-01-29 19:00:00	5.8512	5.338	9.83833	7.95625
2017-01-29 19:30:00	4.5061	5.638	8.26484	7.50636
2017-01-29 20:00:00	4.0139	5.431	6.48095	7.15105
2017-01-29 20:30:00	3.8361	5.395	6.73219	6.2664
2017-01-29 21:00:00	3.4053	4.772	6.97388	6.1469
2017-01-29 21:30:00	3.1272	4.274	6.94362	5.97327
2017-01-29 22:00:00	2.6808	4.16	6.92763	5.79062
2017-01-29 22:30:00	2.2412	2.744	6.27257	5.28552
2017-01-29 23:00:00	2.612	1.624	6.02197	5.08708
2017-01-29 23:30:00	2.2242	2.047	5.59393	4.48728
2017-01-30	1.8907	1.527	4.84494	3.87845
2017-01-30 00:30:00	2.0968	1.61	2.90355	3.77472
2017-01-30 01:00:00	2.7541	1.135	1.84417	3.06893
2017-01-30 01:30:00	2.7439	0.917	1.5754	2.52324
2017-01-30 02:00:00	2.5882	1.249	1.40107	2.67658
2017-01-30 02:30:00	1.7724	0.651	2.15693	2.89079
2017-01-30 03:00:00	1.5161	0.971	1.61151	2.67432
2017-01-30 03:30:00	1.7657	0.95	1.95434	2.35638
2017-01-30 04:00:00	1.0273	-0.039	0.0748042	2.48491
2017-01-30 04:30:00	-0.28182	0.072	0.987188	2.76452
2017-01-30 05:00:00	-1.4682	-0.271	1.70163	2.7104
2017-01-30 05:30:00	-1.6086	-0.114	0.629868	2.51648
2017-01-30 06:00:00	-1.9286	-0.575	-0.284811	2.40599
2017-01-30 06:30:00	-2.1066	-1.826	-0.8611	2.65177
2017-01-30 07:00:00	-2.6888	-1.151	-0.867266	2.34059
2017-01-30 07:30:00	-3.2667	0.928	-0.364863	1.85804
2017-01-30 08:00:00	-4.2984	-0.793	-2.25868	1.35294
2017-01-30 08:30:00	-4.3557	-1.128	-3.34738	1.60324
2017-01-30 09:00:00	-2.2722	-0.281	-3.22339	-0.737368
2017-01-30 09:30:00	-1.8022	-1.96	-3.2265	-2.93624
2017-01-30 10:00:00	-1.2619	-2.441	-2.58301	-2.36179
2017-01-30 10:30:00	-1.5888	-2.35	-2.25323	-0.31355
2017-01-30 11:00:00	-1.6701	-2.868	-1.44848	1.35322
2017-01-30 11:30:00	-0.6698	-2.394	-0.323248	1.35184
2017-01-30 12:00:00	0.58572	-1.611	1.21249	2.40826
2017-01-30 12:30:00	1.2616	-1.025	1.73306	4.14455
2017-01-30 13:00:00	1.6934	-1.034	1.71843	4.94279
2017-01-30 13:30:00	0.87473	-1.057	1.72732	5.05553
2017-01-30 14:00:00	-0.62766	-1.155	1.70681	5.37573
2017-01-30 14:30:00	-1.4274	-1.041	1.58916	4.52563
2017-01-30 15:00:00	-2.0806	-0.99	1.12397	5.01946
2017-01-30 15:30:00	-1.9744	-1.054	0.617495	5.60123
2017-01-30 16:00:00	-2.6886	-1.43	0.807675	4.92024
2017-01-30 16:30:00	-2.8343	-1.756	0.218862	4.73083
2017-01-30 17:00:00	-3.0726	-2.15	-0.33645	3.93484
2017-01-30 17:30:00	-3.6857	-2.33	-0.845481	2.85023
2017-01-30 18:00:00	-4.1006	-3.121	-1.21269	2.1512
2017-01-30 18:30:00	-4.3023	-4.363	-1.72872	0.692267
2017-01-30 19:00:00	-4.8551	-4.447	-2.6371	-0.414897
2017-01-30 19:30:00	-5.2771	-4.568	-3.20047	-1.1283
2017-01-30 20:00:00	-5.8674	-5.236	-3.62252	-1.77489
2017-01-30 20:30:00	-6.5481	-6.524	-3.2816	-2.84029
2017-01-30 21:00:00	-6.7612	-8.18	-3.51846	-3.41962
2017-01-30 21:30:00	-7.3018	-8.14	-3.93931	-3.7873
2017-01-30 22:00:00	-7.1024	-9.6	-4.67152	-3.69256
2017-01-30 22:30:00	-6.6476	-9.88	-4.4196	-3.21661
2017-01-30 23:00:00	-6.5468	-9.7	-4.36134	-3.1512
2017-01-30 23:30:00	-6.7048	-9.92	-4.64574	-3.3497
2017-01-31	-6.567	-9.4	-5.0469	-3.62489
2017-01-31 00:30:00	-6.7563	-7.658	-5.58805	-3.90911
2017-01-31 01:00:00	-6.9355	-8.09	-6.26201	-4.02414
2017-01-31 01:30:00	-7.1595	-7.994	-6.37366	-4.4031
2017-01-31 02:00:00	-7.5627	-8.31	-6.85561	-5.12717
2017-01-31 02:30:00	-7.8965	-8.74	-7.40196	-5.11056
2017-01-31 03:00:00	-8.2415	-8.34	-7.79896	-4.64938
2017-01-31 03:30:00	-8.8396	-8.04	-7.5845	-4.71816
2017-01-31 04:00:00	-9.2226	-7.964	-7.22673	-5.02301
2017-01-31 04:30:00	-9.2545	-8.22	-7.3822	-5.44643
2017-01-31 05:00:00	-9.1531	-8.54	-7.61669	-6.26468
2017-01-31 05:30:00	-9.4633	-8.58	-8.05322	-7.14496
2017-01-31 06:00:00	-9.5362	-9.13	-7.86062	-7.28935
2017-01-31 06:30:00	-9.5653	-9.57	-7.0982	-8.42866
2017-01-31 07:00:00	-9.1429	-9.83	-6.82472	-7.42697
2017-01-31 07:30:00	-9.3042	-9.33	-6.61279	-6.85619
2017-01-31 08:00:00	-9.4846	-8.8	-7.57417	-7.18332
2017-01-31 08:30:00	-9.8151	-8.63	-8.07415	-8.59336
2017-01-31 09:00:00	-10.072	-8.8	-8.39884	-8.53019
2017-01-31 09:30:00	-9.9272	-8.8	-8.24388	-8.22787
2017-01-31 10:00:00	-9.9552	-9.26	-7.9723	-7.83532
2017-01-31 10:30:00	-9.6359	-9.61	-7.86145	-6.99155
2017-01-31 11:00:00	-9.3502	-9.8	-7.78099	-5.73492
2017-01-31 11:30:00	-9.6382	-10.12	-8.33469	-5.30627
2017-01-31 12:00:00	-9.3271	-10.09	-8.24389	-5.34688
2017-01-31 12:30:00	-9.0789	-10.51	-8.65426	-3.42573
2017-01-31 13:00:00	-9.212	-10.74	-8.81353	-4.49557
2017-01-31 13:30:00	-10.413	-10.45	-8.77719	-4.08503
2017-01-31 14:00:00	-10.081	-10.5	-8.83007	-4.00383
2017-01-31 14:30:00	-9.9585	-10.6	-9.35947	-4.41887
2017-01-31 15:00:00	-9.4438	-10.27	-9.48258	-4.10308
2017-01-31 15:30:00	-9.6503	-10.31	-9.5258	-4.77978
2017-01-31 16:00:00	-9.2787	-10.28	-9.88418	-5.22415
2017-01-31 16:30:00	-9.487	-10.08	-9.75221	-5.11362
2017-01-31 17:00:00	-10.156	-9.97	-10.1334	-5.55123
2017-01-31 17:30:00	-10.617	-10.06	-10.6578	-6.32939
2017-01-31 18:00:00	-10.909	-10.48	-11.3794	-7.44259
2017-01-31 18:30:00	-11.676	-11.25	-12.9401	-8.41964
2017-01-31 19:00:00	-12.742	-11.8	-13.911	-8.92951
2017-01-31 19:30:00	-13.434	-11.37	-14.4174	-9.45517
2017-01-31 20:00:00	-13.732	-11.52	-15.1872	-9.66724
2017-01-31 20:30:00	-14.906	-11.14	-15.7654	-10.4541
2017-01-31 21:00:00	-15.167	-11.13	-14.2296	-10.8368
2017-01-31 21:30:00	-14.338	-11.2	-13.5693	-11.2104
2017-01-31 22:00:00	-13.639	-11.34	-13.7578	-11.8804
2017-01-31 22:30:00	-12.433	-11.05	-13.5721	-12.4193
2017-01-31 23:00:00	-12.271	-11.26	-12.9028	-13.0354
2017-01-31 23:30:00	-12.072	-11.04	-13.0938	-14.4595
2017-02-01	-12.149	-10.71	-13.1246	-12.9113
2017-02-01 00:30:00	-12.344	-10.54	-12.2957	-11.6543
2017-02-01 01:00:00	-12.286	-10.43	-11.9086	-11.3473
2017-02-01 01:30:00	-11.959	-10.44	-11.4077	-11.002
2017-02-01 02:00:00	-11.863	-10.52	-10.7199	-11.1037
2017-02-01 02:30:00	-11.691	-10.71	-10.4596	-11.2212
2017-02-01 03:00:00	-11.656	-10.78	-10.2885	-11.2391
2017-02-01 03:30:00	-11.647	-10.74	-10.2241	-11.3699
2017-02-01 04:00:00	-11.542	-10.69	-10.1273	-11.6249
2017-02-01 04:30:00	-11.469	-10.74	-10.2363	-12.9497
2017-02-01 05:00:00	-11.547	-10.77	-10.3774	-12.7578
2017-02-01 05:30:00	-11.695	-10.68	-10.4213	-11.7107
2017-02-01 06:00:00	-11.718	-10.68	-10.2995	-11.1984
2017-02-01 06:30:00	-11.646	-10.66	-10.173	-11.2661
2017-02-01 07:00:00	-11.671	-10.46	-10.1567	-10.761
2017-02-01 07:30:00	-11.784	-10.26	-10.1457	-10.0267
2017-02-01 08:00:00	-11.975	-10.06	-10.147	-9.9228
2017-02-01 08:30:00	-12.008	-9.98	-10.1537	-9.91116
2017-02-01 09:00:00	-11.966	-10.01	-10.1827	-10.0022
2017-02-01 09:30:00	-12.118	-10.12	-10.1418	-9.81299
2017-02-01 10:00:00	-11.582	-10.12	-9.95495	-9.69333
2017-02-01 10:30:00	-11.169	-9.97	-9.50134	-9.8583
2017-02-01 11:00:00	-10.813	-9.75	-8.92656	-8.30416
2017-02-01 11:30:00	-10.425	-9.55	-8.56695	-7.82176
2017-02-01 12:00:00	-10.01	-9.36	-8.12291	-7.72249
2017-02-01 12:30:00	-9.7121	-9.19	-7.87787	-7.19908
2017-02-01 13:00:00	-9.5939	-8.94	-7.63753	-6.93512
2017-02-01 13:30:00	-9.505	-8.82	-7.67636	-6.37111
2017-02-01 14:00:00	-9.3793	-8.87	-7.57149	-6.37562
2017-02-01 14:30:00	-9.2943	-8.69	-7.60202	-6.62379
2017-02-01 15:00:00	-9.1656	-8.46	-7.77878	-6.17733
2017-02-01 15:30:00	-9.1521	-8.07	-7.73313	-5.94335
2017-02-01 16:00:00	-8.6895	-8.06	-7.44867	-6.00622
2017-02-01 16:30:00	-9.2529	-7.879	-8.16553	-6.38137
2017-02-01 17:00:00	-9.916	-7.481	-8.33002	-6.33965
2017-02-01 17:30:00	-10.721	-7.987	-8.62387	-6.68247
2017-02-01 18:00:00	-11.607	-8.78	-10.5202	-8.19178
2017-02-01 18:30:00	-12.715	-9.8	-11.8491	-8.58659
2017-02-01 19:00:00	-13.483	-10.76	-11.8061	-9.04908
2017-02-01 19:30:00	-13.521	-10.89	-12.3559	-11.5483
2017-02-01 20:00:00	-14.259	-11.45	-11.958	-11.9617
2017-02-01 20:30:00	-12.955	-12.19	-11.525	-13.0582
2017-02-01 21:00:00	-12.624	-12.28	-12.1161	-13.9901
2017-02-01 21:30:00	-12.955	-11.9	-12.7545	-14.4505
2017-02-01 22:00:00	-13.045	-11.83	-12.4273	-14.8522
2017-02-01 22:30:00	-13.56	-11.46	-12.1071	-16.0348
2017-02-01 23:00:00	-13.971	-11.19	-11.5736	-16.3485
2017-02-01 23:30:00	-12.789	-10.63	-12.2527	-16.4184
2017-02-02	-12.195	-10.46	-13.4714	-16.4477
2017-02-02 00:30:00	-12.094	-10.67	-13.1266	-17.4246
2017-02-02 01:00:00	-11.933	-10.65	-13.002	-17.6181
2017-02-02 01:30:00	-11.77	-10.53	-12.47	-17.494
2017-02-02 02:00:00	-11.705	-10.43	-11.1214	-17.7071
2017-02-02 02:30:00	-11.831	-10.67	-10.5647	-17.4494
2017-02-02 03:00:00	-11.874	-10.66	-10.8076	-16.8425
2017-02-02 03:30:00	-12.021	-10.79	-10.2533	-17.678
2017-02-02 04:00:00	-12.114	-10.76	-10.1046	-17.646
2017-02-02 04:30:00	-12.448	-10.79	-10.1235	-16.6496
2017-02-02 05:00:00	-12.913	-10.96	-10.2455	-15.9491
2017-02-02 05:30:00	-13.217	-10.99	-10.6083	-15.3667
2017-02-02 06:00:00	-13.264	-11.81	-10.7527	-14.5475
2017-02-02 06:30:00	-13.677	-12.21	-10.5494	-13.9607
2017-02-02 07:00:00	-15.004	-13.18	-10.3962	-13.8479
2017-02-02 07:30:00	-15.757	-13.86	-10.2516	-13.8524
2017-02-02 08:00:00	-15.929	-14.22	-10.2453	-13.805
2017-02-02 08:30:00	-16.292	-14.43	-10.2575	-13.7418
2017-02-02 09:00:00	-17.144	-15.07	-11.1658	-13.7012
2017-02-02 09:30:00	-17.326	-15.91	-11.6781	-13.6425
2017-02-02 10:00:00	-16.108	-15.43	-11.867	-13.1189
2017-02-02 10:30:00	-15.017	-15.19	-11.3051	-12.5051
2017-02-02 11:00:00	-13.848	-14.58	-11.0173	-11.9409
2017-02-02 11:30:00	-13.017	-13.81	-10.5681	-11.0788
2017-02-02 12:00:00	-12.036	-13.21	-10.0323	-10.1336
2017-02-02 12:30:00	-11.164	-12.34	-9.47169	-9.09913
2017-02-02 13:00:00	-10.424	-11.77	-9.15033	-7.25049
2017-02-02 13:30:00	-10.238	-11.38	-8.62857	-6.9464
2017-02-02 14:00:00	-9.7429	-10.92	-8.29499	-6.71629
2017-02-02 14:30:00	-9.244	-10.49	-7.93526	-6.49614
2017-02-02 15:00:00	-8.9495	-10.17	-7.64907	-6.39034
2017-02-02 15:30:00	-7.7984	-9.56	-7.57756	-6.67681
2017-02-02 16:00:00	-7.7649	-9.41	-7.43469	-6.80764
2017-02-02 16:30:00	-8.0383	-9.01	-7.1992	-6.99922
2017-02-02 17:00:00	-8.5242	-8.16	-7.22976	-7.1491
2017-02-02 17:30:00	-8.9273	-6.191	-7.61808	-7.47969
2017-02-02 18:00:00	-9.5759	-9.67	-9.11145	-8.02483
2017-02-02 18:30:00	-10.575	-10.64	-12.3259	-9.13255
2017-02-02 19:00:00	-11.538	-12.59	-13.8204	-10.8945
2017-02-02 19:30:00	-12.539	-13.63	-14.2884	-11.9269
2017-02-02 20:00:00	-12.392	-13.92	-15.3818	-13.0156
2017-02-02 20:30:00	-12.81	-14.52	-15.8616	-13.4913
2017-02-02 21:00:00	-12.851	-14.46	-15.2165	-14.0149
2017-02-02 21:30:00	-12.854	-15.05	-14.8208	-15.2043
2017-02-02 22:00:00	-13.705	-16.3	-14.0384	-16.0009
2017-02-02 22:30:00	-14.092	-15.74	-15.3877	-16.7412
2017-02-02 23:00:00	-14.455	-15.84	-14.6494	-17.2289
2017-02-02 23:30:00	-14.232	-16.59	-14.4624	-17.5552
2017-02-03	-15.774	-16.12	-14.9093	-17.4478
2017-02-03 00:30:00	-16.062	-16.28	-15.3598	-17.5024
2017-02-03 01:00:00	-17.932	-16.42	-14.3414	-17.4546
2017-02-03 01:30:00	-18.345	-16.42	-14.2531	-17.7184
2017-02-03 02:00:00	-19.186	-16.89	-13.95	-17.3278
2017-02-03 02:30:00	-17.675	-17.23	-14.8423	-16.7475
2017-02-03 03:00:00	-17.563	-17.02	-14.3236	-16.7611
2017-02-03 03:30:00	-17.008	-17.37	-15.995	-17.1858
2017-02-03 04:00:00	-14.789	-17.51	-16.2868	-16.647
2017-02-03 04:30:00	-14.41	-17.67	-16.0736	-14.7022
2017-02-03 05:00:00	-14.216	-17.35	-16.6528	-15.0461
2017-02-03 05:30:00	-15.125	-19.79	-15.7637	-14.6671
2017-02-03 06:00:00	-15.684	-20.36	-16.416	-14.956
2017-02-03 06:30:00	-15.96	-20.51	-17.2603	-15.9309
2017-02-03 07:00:00	-16.287	-20.85	-17.4965	-16.0596
2017-02-03 07:30:00	-16.32	-21.18	-17.6059	-16.4116
2017-02-03 08:00:00	-16.54	-21.37	-18.2911	-16.3033
2017-02-03 08:30:00	-17.011	-21.19	-19.5308	-16.0032
2017-02-03 09:00:00	-17.793	-21.17	-19.6916	-15.5021
2017-02-03 09:30:00	-18.011	-21.44	-20.1382	-14.7799
2017-02-03 10:00:00	-17.921	-21.14	-19.6618	-14.3895
2017-02-03 10:30:00	-17.306	-20.92	-18.7528	-13.9675
2017-02-03 11:00:00	-16.613	-20.33	-18.2139	-13.4574
2017-02-03 11:30:00	-15.841	-19.44	-17.8907	-13.2746
2017-02-03 12:00:00	-14.803	-18.42	-17.2661	-12.7038
2017-02-03 12:30:00	-13.615	-18.43	-16.4287	-12.1575
2017-02-03 13:00:00	-13.444	-17.37	-15.229	-11.6139
2017-02-03 13:30:00	-13.332	-16.06	-14.6555	-10.9962
2017-02-03 14:00:00	-13.289	-15.34	-14.29	-10.6625
2017-02-03 14:30:00	-13.33	-14.62	-13.7079	-10.5985
2017-02-03 15:00:00	-13.427	-14.04	-13.0811	-10.7225
2017-02-03 15:30:00	-13.441	-13.81	-12.875	-11.0317
2017-02-03 16:00:00	-13.794	-13.41	-12.6797	-11.1454
2017-02-03 16:30:00	-14.088	-13.27	-12.2095	-11.3676
2017-02-03 17:00:00	-14.534	-13.38	-11.8936	-11.3304
2017-02-03 17:30:00	-14.784	-13.66	-11.5568	-11.5351
2017-02-03 18:00:00	-14.848	-13.73	-11.7126	-11.6297
2017-02-03 18:30:00	-15.038	-13.8	-11.8521	-12.0266
2017-02-03 19:00:00	-15.206	-13.85	-12.4641	-12.5793
2017-02-03 19:30:00	-15.347	-13.89	-12.9178	-12.8843
2017-02-03 20:00:00	-15.578	-14.02	-13.2888	-12.8662
2017-02-03 20:30:00	-15.731	-14.14	-13.4639	-13.1347
2017-02-03 21:00:00	-15.777	-14.27	-13.7396	-13.4056
2017-02-03 21:30:00	-15.83	-14.42	-14.1321	-13.3378
2017-02-03 22:00:00	-15.885	-14.64	-14.5028	-13.2679
2017-02-03 22:30:00	-15.946	-14.83	-14.5994	-13.1776
2017-02-03 23:00:00	-15.951	-14.99	-14.5626	-12.9429
2017-02-03 23:30:00	-16.024	-15.1	-14.6167	-13.0332
2017-02-04	-16.096	-15.23	-14.6026	-13.1821
2017-02-04 00:30:00	-16.142	-15.3	-14.6171	-13.401
2017-02-04 01:00:00	-16.227	-15.35	-14.5982	-13.9495
2017-02-04 01:30:00	-16.394	-15.51	-14.5024	-14.6942
2017-02-04 02:00:00	-16.523	-15.56	-14.547	-14.6378
2017-02-04 02:30:00	-16.771	-15.59	-14.5858	-14.5678
2017-02-04 03:00:00	-16.831	-15.62	-14.6074	-14.5069
2017-02-04 03:30:00	-16.966	-15.64	-14.5631	-14.7055
2017-02-04 04:00:00	-17.06	-15.77	-14.6109	-14.7551
2017-02-04 04:30:00	-16.944	-15.95	-14.7692	-14.7529
2017-02-04 05:00:00	-16.938	-16.27	-14.859	-14.6242
2017-02-04 05:30:00	-17.158	-16.35	-15.0702	-14.692
2017-02-04 06:00:00	-17.463	-16.37	-15.1113	-14.877
2017-02-04 06:30:00	-17.719	-16.38	-15.3249	-14.7281
2017-02-04 07:00:00	-17.674	-16.36	-15.6152	-14.7258
2017-02-04 07:30:00	-17.763	-16.33	-15.9129	-14.8319
2017-02-04 08:00:00	-17.818	-16.26	-16.0285	-14.8229
2017-02-04 08:30:00	-17.896	-16.24	-15.9078	-14.7574
2017-02-04 09:00:00	-17.949	-16.34	-15.8781	-14.6468
2017-02-04 09:30:00	-18.017	-16.41	-15.8377	-14.543
2017-02-04 10:00:00	-17.937	-16.31	-15.7892	-14.297
2017-02-04 10:30:00	-17.893	-16.21	-15.6797	-14.1887
2017-02-04 11:00:00	-17.518	-16.09	-15.6513	-13.9901
2017-02-04 11:30:00	-17.006	-16.03	-15.5306	-13.7463
2017-02-04 12:00:00	-16.546	-15.85	-15.4206	-12.9497
2017-02-04 12:30:00	-15.927	-15.78	-15.4958	-12.8729
2017-02-04 13:00:00	-15.619	-15.42	-15.2647	-12.9813
2017-02-04 13:30:00	-15.367	-14.64	-15.1896	-12.5054
2017-02-04 14:00:00	-15.693	-15.1	-14.9704	-12.9474
2017-02-04 14:30:00	-16.249	-15.14	-14.7513	-13.0994
2017-02-04 15:00:00	-15.976	-14.64	-14.726	-12.9963
2017-02-04 15:30:00	-16.189	-14.12	-14.4927	-13.6777
2017-02-04 16:00:00	-16.513	-14.58	-14.4439	-13.4058
2017-02-04 16:30:00	-16.7	-15.11	-14.4073	-13.522
2017-02-04 17:00:00	-16.87	-15.21	-14.5047	-13.6045
2017-02-04 17:30:00	-17.269	-15.52	-14.4829	-13.6668
2017-02-04 18:00:00	-17.409	-15.59	-14.5709	-14.0443
2017-02-04 18:30:00	-17.912	-15.8	-14.917	-14.1909
2017-02-04 19:00:00	-18.187	-15.99	-15.1418	-14.8499
2017-02-04 19:30:00	-18.489	-16.02	-15.26	-15.5766
2017-02-04 20:00:00	-18.93	-16.04	-15.4055	-16.3688
2017-02-04 20:30:00	-19.734	-16.15	-15.5104	-17.346
2017-02-04 21:00:00	-20.151	-16.59	-15.6476	-17.6663
2017-02-04 21:30:00	-20.555	-16.94	-15.8341	-17.6072
2017-02-04 22:00:00	-20.803	-16.98	-16.0911	-17.8127
2017-02-04 22:30:00	-20.089	-17.07	-16.4834	-18.5971
2017-02-04 23:00:00	-18.814	-17.55	-16.637	-17.8432
2017-02-04 23:30:00	-18.903	-18.05	-16.6149	-16.8134
2017-02-05	-19.145	-17.93	-16.3474	-16.3251
2017-02-05 00:30:00	-18.724	-17.45	-16.5238	-16.1882
2017-02-05 01:00:00	-18.192	-17.2	-16.5235	-16.2582
2017-02-05 01:30:00	-18.235	-16.99	-16.4013	-16.1927
2017-02-05 02:00:00	-18.428	-16.94	-16.4185	-16.1386
2017-02-05 02:30:00	-18.428	-16.87	-16.4256	-15.8948
2017-02-05 03:00:00	-18.411	-16.93	-16.3016	-15.9332
2017-02-05 03:30:00	-18.347	-16.95	-16.2784	-15.9242
2017-02-05 04:00:00	-18.318	-17.04	-16.3577	-15.8881
2017-02-05 04:30:00	-18.327	-16.99	-16.4125	-15.94
2017-02-05 05:00:00	-18.261	-17.03	-16.4324	-16.0302
2017-02-05 05:30:00	-18.227	-17	-16.5413	-16.1544
2017-02-05 06:00:00	-18.261	-17	-16.5813	-16.195
2017-02-05 06:30:00	-18.344	-17.01	-16.6546	-16.186
2017-02-05 07:00:00	-18.333	-16.99	-16.6655	-16.2469
2017-02-05 07:30:00	-18.32	-17.06	-16.7011	-16.4726
2017-02-05 08:00:00	-18.277	-17.18	-16.8089	-16.6238
2017-02-05 08:30:00	-18.322	-17.43	-16.9174	-16.4771
2017-02-05 09:00:00	-18.565	-17.94	-17.1945	-16.4365
2017-02-05 09:30:00	-19.213	-18.48	-17.1977	-16.4049
2017-02-05 10:00:00	-19.233	-18.74	-17.1772	-16.2288
2017-02-05 10:30:00	-18.352	-18.97	-17.239	-15.9806
2017-02-05 11:00:00	-18.112	-19.35	-17.2231	-15.7278
2017-02-05 11:30:00	-17.808	-19.21	-17.0316	-15.6195
2017-02-05 12:00:00	-17.745	-18.65	-16.9722	-15.1591
2017-02-05 12:30:00	-17.604	-17.71	-17.0533	-14.8183
2017-02-05 13:00:00	-17.523	-17.16	-16.9694	-14.8116
2017-02-05 13:30:00	-17.394	-17.09	-16.8003	-14.9424
2017-02-05 14:00:00	-17.356	-16.66	-16.5413	-14.9831
2017-02-05 14:30:00	-17.39	-16.45	-16.366	-15.0508
2017-02-05 15:00:00	-17.544	-16.45	-16.3041	-15.1636
2017-02-05 15:30:00	-17.525	-16.35	-16.058	-15.2065
2017-02-05 16:00:00	-17.449	-16.5	-15.9508	-15.2539
2017-02-05 16:30:00	-17.585	-16.8	-15.9006	-15.3442
2017-02-05 17:00:00	-17.714	-17.31	-15.916	-15.2787
2017-02-05 17:30:00	-17.867	-18.01	-15.9748	-15.3803
2017-02-05 18:00:00	-18.037	-18.52	-16.0523	-15.5292
2017-02-05 18:30:00	-18.292	-19.2	-16.1185	-15.6804
2017-02-05 19:00:00	-18.775	-19.59	-16.123	-15.7639
2017-02-05 19:30:00	-18.947	-19.83	-16.2795	-15.8542
2017-02-05 20:00:00	-19.206	-20.07	-16.8935	-15.9309
2017-02-05 20:30:00	-19.752	-20.22	-17.4798	-16.0054
2017-02-05 21:00:00	-20.072	-20.35	-17.9009	-16.0415
2017-02-05 21:30:00	-20.254	-20.35	-18.2544	-16.1679
2017-02-05 22:00:00	-20.544	-20.39	-18.5441	-16.1882
2017-02-05 22:30:00	-20.699	-20.51	-18.8025	-16.2198
2017-02-05 23:00:00	-20.846	-20.76	-19.0681	-16.2492
2017-02-05 23:30:00	-21.011	-20.86	-19.3476	-16.4094
2017-02-06	-21.152	-21.01	-19.5261	-16.4794
2017-02-06 00:30:00	-21.307	-21.13	-19.7215	-16.5493
2017-02-06 01:00:00	-21.57	-21.35	-19.958	-16.5764
2017-02-06 01:30:00	-21.782	-21.45	-20.2204	-16.6464
2017-02-06 02:00:00	-21.957	-21.59	-20.4878	-16.7592
2017-02-06 02:30:00	-22.206	-21.8	-20.6136	-16.845
2017-02-06 03:00:00	-22.396	-22.09	-20.7336	-16.9849
2017-02-06 03:30:00	-22.592	-22.37	-20.8792	-17.0661
2017-02-06 04:00:00	-22.778	-22.51	-21.1449	-17.206
2017-02-06 04:30:00	-22.949	-22.53	-21.4322	-17.5558
2017-02-06 05:00:00	-23.028	-22.6	-21.5793	-18.348
2017-02-06 05:30:00	-23.267	-22.7	-21.6693	-18.9788
2017-02-06 06:00:00	-23.341	-22.77	-21.7123	-19.5423
2017-02-06 06:30:00	-23.413	-22.79	-21.782	-19.7347
2017-02-06 07:00:00	-23.535	-22.82	-21.8379	-19.8964
2017-02-06 07:30:00	-23.566	-22.86	-21.9051	-20.1016
2017-02-06 08:00:00	-23.622	-22.93	-21.9464	-20.2935
2017-02-06 08:30:00	-23.727	-22.92	-21.9617	-20.4425
2017-02-06 09:00:00	-23.77	-22.95	-21.9724	-20.587
2017-02-06 09:30:00	-23.691	-22.97	-21.9741	-20.6502
2017-02-06 10:00:00	-23.646	-22.92	-21.9362	-20.4538
2017-02-06 10:30:00	-23.507	-22.77	-21.808	-20.2438
2017-02-06 11:00:00	-23.553	-22.59	-21.6426	-20.3025
2017-02-06 11:30:00	-23.658	-22.39	-21.3944	-20.1016
2017-02-06 12:00:00	-23.177	-22.07	-21.2043	-19.6704
2017-02-06 12:30:00	-23.355	-21.58	-21.1313	-19.1359
2017-02-06 13:00:00	-23.235	-21.42	-20.8708	-19.2324
2017-02-06 13:30:00	-23.171	-21.18	-20.6157	-18.9803
2017-02-06 14:00:00	-23.177	-20.96	-20.5271	-19.4868
2017-02-06 14:30:00	-23.1	-20.84	-20.5079	-19.439
2017-02-06 15:00:00	-22.963	-20.85	-20.3924	-19.2323
2017-02-06 15:30:00	-23.134	-21.12	-20.2639	-18.7384
2017-02-06 16:00:00	-22.97	-21.25	-20.3234	-18.5714
2017-02-06 16:30:00	-22.974	-21.05	-20.3883	-18.1652
2017-02-06 17:00:00	-22.859	-21.17	-20.2506	-18.5195
2017-02-06 17:30:00	-23.064	-21.28	-20.249	-19.7357
2017-02-06 18:00:00	-23.548	-21.37	-20.829	-20.9661
2017-02-06 18:30:00	-24.721	-21.81	-21.7814	-21.35
2017-02-06 19:00:00	-25.516	-22.16	-21.9408	-21.0407
2017-02-06 19:30:00	-26.013	-22.27	-22.3372	-22.2237
2017-02-06 20:00:00	-25.955	-22.39	-22.818	-23.9747
2017-02-06 20:30:00	-25.791	-22.55	-23.7496	-25.6799
2017-02-06 21:00:00	-25.718	-22.62	-25.119	-26.4725
2017-02-06 21:30:00	-25.989	-22.72	-24.7476	-26.7488
2017-02-06 22:00:00	-26.47	-22.94	-24.3965	-25.6326
2017-02-06 22:30:00	-26.633	-23.17	-25.1138	-24.967
2017-02-06 23:00:00	-26.762	-23.54	-24.3639	-24.9118
2017-02-06 23:30:00	-26.735	-24.12	-23.927	-24.6841
2017-02-07	-26.669	-24.95	-24.5136	-25.2463
2017-02-07 00:30:00	-26.268	-25.7	-25.3221	-25.7859
2017-02-07 01:00:00	-26.366	-25.87	-25.2346	-25.6497
2017-02-07 01:30:00	-26.771	-26.03	-24.1086	-25.5633
2017-02-07 02:00:00	-27.047	-26.31	-24.0687	-25.5204
2017-02-07 02:30:00	-27.004	-26.77	-25.1943	-24.1279
2017-02-07 03:00:00	-26.677	-26.86	-26.5471	-23.5823
2017-02-07 03:30:00	-26.663	-27.66	-27.3143	-25.2848
2017-02-07 04:00:00	-26.957	-27.74	-28.4939	-27.2057
2017-02-07 04:30:00	-27.286	-28.21	-28.5859	-26.0344
2017-02-07 05:00:00	-27.258	-28.32	-28.7543	-24.9549
2017-02-07 05:30:00	-26.45	-28.81	-28.7866	-25.0196
2017-02-07 06:00:00	-25.695	-28.29	-29.4812	-26.4582
2017-02-07 06:30:00	-25.566	-28.11	-30.0675	-26.8632
2017-02-07 07:00:00	-25.676	-28.15	-29.9738	-27.1951
2017-02-07 07:30:00	-25.948	-28.28	-29.4816	-27.9652
2017-02-07 08:00:00	-26.519	-27.96	-28.932	-28.2346
2017-02-07 08:30:00	-27.037	-27.28	-28.0571	-29.393
2017-02-07 09:00:00	-27.266	-27.81	-27.4793	-29.0022
2017-02-07 09:30:00	-26.797	-28.1	-27.8403	-29.8583
2017-02-07 10:00:00	-26.692	-27.87	-27.8573	-29.4765
2017-02-07 10:30:00	-25.285	-27.5	-26.9533	-26.5854
2017-02-07 11:00:00	-24.556	-26.5	-26.6566	-24.8213
2017-02-07 11:30:00	-23.479	-26.07	-26.5583	-25.1104
2017-02-07 12:00:00	-22.33	-25.48	-25.8782	-24.4877
2017-02-07 12:30:00	-21.592	-24.88	-25.6121	-23.2021
2017-02-07 13:00:00	-21.61	-24.63	-25.5333	-21.6841
2017-02-07 13:30:00	-21.786	-23.94	-25.2147	-18.2528
2017-02-07 14:00:00	-21.415	-23.81	-24.9146	-14.0555
2017-02-07 14:30:00	-21.404	-23.15	-24.9911	-16.134
2017-02-07 15:00:00	-20.978	-22.87	-24.4898	-16.5697
2017-02-07 15:30:00	-21.464	-22.33	-24.3895	-18.4609
2017-02-07 16:00:00	-21.61	-22.53	-24.9228	-21.643
2017-02-07 16:30:00	-21.747	-22.29	-25.0341	-19.93
2017-02-07 17:00:00	-22.239	-22.65	-24.8226	-18.91
2017-02-07 17:30:00	-22.295	-23.06	-24.7566	-19.2935
2017-02-07 18:00:00	-21.982	-23.02	-24.7979	-22.1578
2017-02-07 18:30:00	-22.413	-22.93	-24.7769	-25.6572
2017-02-07 19:00:00	-25.056	-23.6	-27.3811	-26.197
2017-02-07 19:30:00	-26.247	-24.21	-30.7481	-26.8908
2017-02-07 20:00:00	-27.015	-24.76	-29.7696	-28.287
2017-02-07 20:30:00	-27.247	-26.49	-27.5427	-28.9593
2017-02-07 21:00:00	-28.782	-26.7	-27.273	-30.6353
2017-02-07 21:30:00	-28.995	-26.31	-26.1304	-29.6414
2017-02-07 22:00:00	-28.056	-25.7	-25.8921	-29.28
2017-02-07 22:30:00	-27.703	-25.8	-25.6441	-29.4969
2017-02-07 23:00:00	-27.506	-26.82	-25.1695	-30.1564
2017-02-07 23:30:00	-25.975	-27.46	-25.0697	-29.8063
2017-02-08	-25.938	-26.51	-25.429	-30.0864
2017-02-08 00:30:00	-25.267	-26.88	-25.3492	-29.8763
2017-02-08 01:00:00	-26.228	-27.68	-24.9816	-29.9328
2017-02-08 01:30:00	-24.671	-27.74	-25.3305	-29.9915
2017-02-08 02:00:00	-24.096	-25.65	-25.1654	-30.3213
2017-02-08 02:30:00	-23.705	-25.51	-24.9611	-29.8176
2017-02-08 03:00:00	-23.872	-26.02	-24.4544	-29.4675
2017-02-08 03:30:00	-24.083	-25.94	-24.415	-28.9864
2017-02-08 04:00:00	-23.655	-25.9	-24.293	-29.2733
2017-02-08 04:30:00	-23.367	-26.05	-25.8855	-30.1225
2017-02-08 05:00:00	-22.999	-25.51	-26.0359	-29.9509
2017-02-08 05:30:00	-22.769	-25.71	-25.4756	-29.0383
2017-02-08 06:00:00	-22.86	-26.27	-25.0204	-28.3042
2017-02-08 06:30:00	-22.775	-25.96	-24.4918	-27.8435
2017-02-08 07:00:00	-22.557	-25.61	-24.0392	-28.1891
2017-02-08 07:30:00	-22.828	-25.89	-24.3037	-28.957
2017-02-08 08:00:00	-22.863	-25.75	-24.9991	-29.8086
2017-02-08 08:30:00	-23.485	-25.99	-24.4677	-30.6217
2017-02-08 09:00:00	-24.002	-25.85	-23.6575	-31.279
2017-02-08 09:30:00	-22.854	-25.95	-23.9425	-31.1932
2017-02-08 10:00:00	-21.008	-25.07	-22.9315	-31.0509
2017-02-08 10:30:00	-19.582	-24.04	-23.5355	-30.1519
2017-02-08 11:00:00	-18.727	-22.61	-22.9375	-28.5821
2017-02-08 11:30:00	-18.192	-21.5	-22.3572	-26.7512
2017-02-08 12:00:00	-17.893	-20.89	-21.7469	-24.4707
2017-02-08 12:30:00	-17.162	-21.44	-21.3129	-23.1849
2017-02-08 13:00:00	-15.406	-19.97	-20.3246	-21.3114
2017-02-08 13:30:00	-15.029	-17.99	-20.4638	-20.1785
2017-02-08 14:00:00	-14.829	-18.17	-19.0966	-19.6271
2017-02-08 14:30:00	-15.13	-16.87	-18.999	-18.7542
2017-02-08 15:00:00	-14.772	-16.68	-18.5289	-18.2352
2017-02-08 15:30:00	-14.649	-18.07	-19.311	-18.2938
2017-02-08 16:00:00	-15.129	-18.55	-18.9619	-17.9666
2017-02-08 16:30:00	-15.138	-19.2	-20.9965	-17.4678
2017-02-08 17:00:00	-14.747	-19.19	-21.2528	-17.8899
2017-02-08 17:30:00	-14.702	-18.97	-20.8534	-17.4949
2017-02-08 18:00:00	-14.814	-19.82	-20.2435	-17.1722
2017-02-08 18:30:00	-14.917	-20.75	-20.7555	-17.5152
2017-02-08 19:00:00	-15.154	-22.01	-20.1065	-17.364
2017-02-08 19:30:00	-15.406	-22.02	-19.8274	-17.3776
2017-02-08 20:00:00	-15.201	-21.78	-20.5988	-17.4114
2017-02-08 20:30:00	-15.336	-22.76	-20.3143	-17.3753
2017-02-08 21:00:00	-15.616	-22.75	-19.9808	-17.4543
2017-02-08 21:30:00	-16.038	-23.18	-18.9191	-17.7229
2017-02-08 22:00:00	-16.232	-22.76	-18.5927	-18.1966
2017-02-08 22:30:00	-15.047	-22.03	-18.1033	-18.2628
2017-02-08 23:00:00	-13.072	-22.42	-18.1891	-17.8325
2017-02-08 23:30:00	-10.309	-22.96	-18.6654	-17.7287
2017-02-09	-11.481	-23.06	-19.2043	-16.2276
2017-02-09 00:30:00	-11.911	-22.41	-19.6203	-16.5109
2017-02-09 01:00:00	-10.722	-22.25	-19.3293	-16.362
2017-02-09 01:30:00	-10.369	-22.1	-19.5139	-16.6035
2017-02-09 02:00:00	-11.674	-22.08	-19.8238	-15.9512
2017-02-09 02:30:00	-12.393	-22.22	-19.7395	-16.2943
2017-02-09 03:00:00	-11.527	-22.09	-20.2352	-16.0438
2017-02-09 03:30:00	-11.91	-21.86	-20.0103	-15.1772
2017-02-09 04:00:00	-12.605	-21.89	-19.7371	-15.2629
2017-02-09 04:30:00	-12.613	-21.69	-19.4969	-14.9921
2017-02-09 05:00:00	-12.394	-21.31	-18.9721	-14.8048
2017-02-09 05:30:00	-11.327	-20.86	-18.0581	-14.0533
2017-02-09 06:00:00	-10.754	-20.42	-17.2152	-13.8772
2017-02-09 06:30:00	-9.7614	-19.68	-17.9345	-14.0036
2017-02-09 07:00:00	-9.0586	-19.34	-17.6058	-14.0465
2017-02-09 07:30:00	-8.1546	-18.8	-16.6293	-13.8027
2017-02-09 08:00:00	-8.2276	-18.02	-15.8084	-13.6831
2017-02-09 08:30:00	-9.4906	-17.6	-16.1778	-14.0871
2017-02-09 09:00:00	-10.775	-17.4	-15.8266	-13.6561
2017-02-09 09:30:00	-10.836	-17.12	-16.2995	-13.0603
2017-02-09 10:00:00	-10.844	-16.65	-16.5053	-13.0038
2017-02-09 10:30:00	-9.9866	-16.07	-16.3484	-12.3922
2017-02-09 11:00:00	-9.5855	-16.16	-16.3478	-11.4169
2017-02-09 11:30:00	-8.4617	-15.97	-15.9456	-10.9668
2017-02-09 12:00:00	-7.2251	-15.52	-15.574	-9.29672
2017-02-09 12:30:00	-7.1345	-15.14	-14.9858	-4.25943
2017-02-09 13:00:00	-6.3331	-14.98	-14.63	5.93668
2017-02-09 13:30:00	-5.7654	-14.92	-13.9814	5.28791
2017-02-09 14:00:00	-5.062	-15.08	-13.2772	4.6474
2017-02-09 14:30:00	-4.3845	-15.12	-13.0541	4.49406
2017-02-09 15:00:00	-3.7531	-14.99	-13.0115	4.58877
2017-02-09 15:30:00	-2.8144	-14.86	-12.7689	4.86612
2017-02-09 16:00:00	-1.6484	-14.57	-12.6229	4.40161
2017-02-09 16:30:00	-1.4271	-14.54	-12.341	4.22122
2017-02-09 17:00:00	-1.754	-14.52	-12.1022	4.62936
2017-02-09 17:30:00	-1.5715	-14.43	-11.922	4.80073
2017-02-09 18:00:00	-1.06	-14.48	-11.5325	4.41739
2017-02-09 18:30:00	-3.0647	-14.47	-11.2443	4.04759
2017-02-09 19:00:00	-9.1484	-14.51	-11.3481	4.01151
2017-02-09 19:30:00	-9.5677	-14.89	-11.4095	3.37111
2017-02-09 20:00:00	-2.8546	-15.5	-12.2013	3.83112
2017-02-09 20:30:00	-0.09282	-16	-13.0786	5.03073
2017-02-09 21:00:00	-1.3183	-15.81	-14.3317	5.0623
2017-02-09 21:30:00	-2.4133	-15.92	-14.5691	4.2618
2017-02-09 22:00:00	-2.5206	-16.17	-14.9234	4.44671
2017-02-09 22:30:00	-11.956	-16.36	-15.8547	4.56396
2017-02-09 23:00:00	-12.106	-16.64	-15.9453	4.21896
2017-02-09 23:30:00	-12.395	-16.78	-16.0589	4.352
2017-02-10	-12.335	-16.42	-16.3777	4.20994
2017-02-10 00:30:00	-12.321	-15.9	-17.1832	4.37004
2017-02-10 01:00:00	-12.491	-15.81	-17.15	4.62259
2017-02-10 01:30:00	-12.611	-15.37	-17.139	4.66543
2017-02-10 02:00:00	-13.065	-14.72	-16.9362	3.94612
2017-02-10 02:30:00	-13.489	-14.69	-17.1836	4.38582
2017-02-10 03:00:00	-13.326	-14.08	-17.4739	4.36328
2017-02-10 03:30:00	-12.987	-13.54	-17.6683	4.11298
2017-02-10 04:00:00	-12.734	-13.24	-17.8699	3.86719
2017-02-10 04:30:00	-12.767	-13.31	-17.2104	3.58307
2017-02-10 05:00:00	-12.336	-14.95	-16.5252	4.32494
2017-02-10 05:30:00	-12.468	-15.66	-15.6133	4.4219
2017-02-10 06:00:00	-12.331	-15.7	-14.5166	4.07916
2017-02-10 06:30:00	-13.005	-15.7	-14.3533	3.75445
2017-02-10 07:00:00	-13.793	-16.67	-14.9432	3.71386
2017-02-10 07:30:00	-15.048	-16.84	-16.0425	3.77474
2017-02-10 08:00:00	-15.07	-17.6	-15.8086	4.14906
2017-02-10 08:30:00	-13.854	-18.3	-15.8047	3.79955
2017-02-10 09:00:00	-13.117	-18.26	-16.42	3.35082
2017-02-10 09:30:00	-11.593	-18.96	-17.3381	3.72513
2017-02-10 10:00:00	-9.6647	-18.57	-17.2879	3.77249
2017-02-10 10:30:00	-9.3522	-18.11	-17.2222	3.72513
2017-02-10 11:00:00	-6.3096	-16.09	-17.5019	4.0769
2017-02-10 11:30:00	-2.9062	-14.87	-16.8401	4.24827
2017-02-10 12:00:00	-1.0831	-14.53	-16.0892	3.86043
2017-02-10 12:30:00	1.3118	-13.94	-15.7737	3.97092
2017-02-10 13:00:00	2.3262	-13.91	-15.3918	4.29337
2017-02-10 13:30:00	3.2315	-13.25	-15.4655	4.467
2017-02-10 14:00:00	3.3203	-12.4	-15.2531	4.54592
2017-02-10 14:30:00	3.2322	-12.12	-14.9144	4.76014
2017-02-10 15:00:00	3.4753	-11.38	-13.7352	5.01044
2017-02-10 15:30:00	3.3334	-11.03	-12.1934	5.55613
2017-02-10 16:00:00	3.4116	-10.96	-12.5099	6.01839
2017-02-10 16:30:00	2.8356	-10.93	-12.6613	5.81161
2017-02-10 17:00:00	2.8344	-10.31	-12.2706	5.61062
2017-02-10 17:30:00	2.604	-9.42	-12.2979	4.94155
2017-02-10 18:00:00	2.1625	-10.15	-12.1152	4.10392
2017-02-10 18:30:00	1.3594	-10.97	-11.9356	2.95393
2017-02-10 19:00:00	0.44501	-11.96	-6.60243	2.41501
2017-02-10 19:30:00	-0.37103	-13.04	-7.39622	1.78137
2017-02-10 20:00:00	-1.0958	-13.3	-4.34566	1.68216
2017-02-10 20:30:00	-1.3289	-13.95	-2.97703	1.67314
2017-02-10 21:00:00	-1.681	-14.19	-3.49946	1.49275
2017-02-10 21:30:00	-3.3985	-14.68	-2.76233	0.615582
2017-02-10 22:00:00	-3.5122	-15.13	-6.47421	0.383326
2017-02-10 22:30:00	-2.5616	-14.6	-4.87898	-0.105755
2017-02-10 23:00:00	-2.4552	-13.76	-4.82656	-0.221252
2017-02-10 23:30:00	-2.3374	-11.89	-3.58721	-0.52163
2017-02-11	-2.8003	-10.12	-3.03102	-0.103027
2017-02-11 00:30:00	-3.5125	-5.139	-2.69904	0.471205
2017-02-11 01:00:00	-4.4565	-4.076	-3.64978	0.339759
2017-02-11 01:30:00	-5.0362	-3.339	-3.3267	-0.0665723
2017-02-11 02:00:00	-4.7284	-2.869	-2.83783	-0.430951
2017-02-11 02:30:00	-4.5442	-2.702	-3.66803	0.602021
2017-02-11 03:00:00	-2.7695	-2.634	-2.91968	0.334004
2017-02-11 03:30:00	-1.8974	-2.451	-1.96196	0.460368
2017-02-11 04:00:00	-1.3218	-3.438	-2.16327	0.137798
2017-02-11 04:30:00	-3.5639	-3.572	-2.27746	0.0971376
2017-02-11 05:00:00	-4.9435	-3.75	-3.04398	0.0228486
2017-02-11 05:30:00	-5.1696	-3.959	-2.91513	-0.107938
2017-02-11 06:00:00	-4.9143	-4.325	-3.30815	-0.145781
2017-02-11 06:30:00	-4.799	-4.491	-3.19954	-0.118603
2017-02-11 07:00:00	-4.8416	-4.812	-3.37838	-1.17841
2017-02-11 07:30:00	-4.6109	-4.894	-4.10124	-2.57429
2017-02-11 08:00:00	-4.4676	-4.945	-5.15749	-2.84964
2017-02-11 08:30:00	-4.4676	-5.659	-4.90497	-2.63465
2017-02-11 09:00:00	-5.2286	-5.314	-4.7459	-2.11584
2017-02-11 09:30:00	-5.851	-4.866	-4.72651	-1.52038
2017-02-11 10:00:00	-5.4994	-5.83	-4.08847	-1.41249
2017-02-11 10:30:00	-4.8487	-6.27	-3.8535	-0.840563
2017-02-11 11:00:00	-4.5185	-5.41	-4.3353	-0.0218704
2017-02-11 11:30:00	-3.5949	-4.333	-3.98684	0.667144
2017-02-11 12:00:00	-2.9884	-3.816	-4.16455	1.42739
2017-02-11 12:30:00	-2.2618	-4.222	-3.59689	1.77463
2017-02-11 13:00:00	-1.269	-3.768	-3.57328	2.27522
2017-02-11 13:30:00	-0.476	-2.891	-3.29113	2.47365
2017-02-11 14:00:00	-0.49105	-2.911	-2.97181	2.7916
2017-02-11 14:30:00	-0.54948	-2.752	-2.55344	2.9517
2017-02-11 15:00:00	-0.37559	-2.763	-2.36776	2.95846
[truncated: 3,588 more rows]

## Sheet: Fig. 7b
Date	Spyhill	Stauffer	Triple G	Fort MacLeod		Sensible heat flux
2017-01-01	-3.18663	11.1351	2.77316	2.707		Positive = downwards
2017-01-01 00:30:00	-4.11317	5.95787	20.4387	1.11788		Empty cell or -99999 = No data
2017-01-01 01:00:00	-2.23947	5.91055	10.0081	11.4756		Watts per square metres
2017-01-01 01:30:00	-1.64701	7.86052	4.39593	-2.17254
2017-01-01 02:00:00	-2.94434	13.9277	-0.325665	0.291136
2017-01-01 02:30:00	-2.5692	10.3124	0.751925	7.7343
2017-01-01 03:00:00	-6.25057	8.97734	-0.695949	-3.37001
2017-01-01 03:30:00	-1.71728	7.48936	-0.612924	2.10755
2017-01-01 04:00:00	1.00546	5.58774	-2.99559	1.65071
2017-01-01 04:30:00	1.13572	6.41409	-1.69048	-0.345969
2017-01-01 05:00:00	-0.26597	8.81363	0.445154	-0.138253
2017-01-01 05:30:00	-4.24025	2.94643	-1.21784	123.54
2017-01-01 06:00:00	6.03823	3.70053	1.17121	1.80363
2017-01-01 06:30:00	1.66162	0.433917	-2.6135	135.346
2017-01-01 07:00:00	2.06381	2.11484	-3.11349	0.0743073
2017-01-01 07:30:00	2.60534	2.55678	0.25999	-0.461644
2017-01-01 08:00:00	2.71509	28.9348	3.78694	1.12857
2017-01-01 08:30:00	1.31456	7.13445	1.3571	-1.1579
2017-01-01 09:00:00	1.6507	12.0567	3.70794	2.07062
2017-01-01 09:30:00	1.22337	8.12087	2.76667	30779.8
2017-01-01 10:00:00	0.895547	9.81773	0.317671	2.10868
2017-01-01 10:30:00	-0.263121	6.41912	-9.07038	1.41329
2017-01-01 11:00:00	-2.01716	8.75511	7.81321	5.9121
2017-01-01 11:30:00	0.685602	10.7467	38.3912	-0.670878
2017-01-01 12:00:00	-3.41007	6.55708	4.8609	0.130736
2017-01-01 12:30:00	-5.76527	4.73355	1.5646	-2.58397
2017-01-01 13:00:00	-4.61506	5.16638	-5.57095	-3.97085
2017-01-01 13:30:00	-3.87507	7.00469	-17.0235	-4.64736
2017-01-01 14:00:00	-4.81549	8.72211	-3.19961	-2.6103
2017-01-01 14:30:00	-4.02103	5.71112	-1.99142	-3.10926
2017-01-01 15:00:00	-2.26783	6.19958	-0.790159	-2.35783
2017-01-01 15:30:00	-1.5433	8.58528	1.73319	-0.676284
2017-01-01 16:00:00	-1.1483	10.0917	5.22714	-1.836
2017-01-01 16:30:00	0.391553	5.94271	-0.144031	0.112661
2017-01-01 17:00:00	1.59415	25.8263	-0.932017	0.263538
2017-01-01 17:30:00	3.61757	25.1605	-2.61438	1.83151
2017-01-01 18:00:00	4.04715	20.5235	0.719573	2.57429
2017-01-01 18:30:00	5.46114	14.2532	7.9119	1.28567
2017-01-01 19:00:00	6.10733	15.8798	2.29839	1.40161
2017-01-01 19:30:00	2.81083	17.1474	7.91113	1.66754
2017-01-01 20:00:00	3.28574	13.2703	-1.0469	2.31213
2017-01-01 20:30:00	-0.735543	0.987364	6.688	-0.0392377
2017-01-01 21:00:00	3.4788	0.191984	-10.1484	2.08604
2017-01-01 21:30:00	1.07935	5.32086	-9.50649	4.8801
2017-01-01 22:00:00	3.72622	-9.33492	5.91661	7.55938
2017-01-01 22:30:00	-2.15424	-8.52584	-1.63399	5.97499
2017-01-01 23:00:00	-1.66996	2.13287	-8.89464	3.91683
2017-01-01 23:30:00	-6.51161	-2.06397	-4.26946	2.30191
2017-01-02	-13.3682	10.4328	-3.85447	1.11732
2017-01-02 00:30:00	-2.22279	7.28269	11.6079	5.37339
2017-01-02 01:00:00	3.82877	3.63343	-0.54741	7.60898
2017-01-02 01:30:00	-7.10646	1.40613	-21.7361	9.3282
2017-01-02 02:00:00	-11.1768	4.26944	-4.35062	5.66664
2017-01-02 02:30:00	-5.97478	8.57546	1.94186	6.00013
2017-01-02 03:00:00	-1.0883	-34.4373	-7.41858	7.90616
2017-01-02 03:30:00	-17.934	0.593406	1.83837	11.4863
2017-01-02 04:00:00	-12.4976	-5.19405	3.79375	25.7964
2017-01-02 04:30:00	-28.6708	-4.37815	-10.109	20.6459
2017-01-02 05:00:00	-99999	-1.96979	-72.2267	-6.34476
2017-01-02 05:30:00	-99999	-5.88253	21.7028	13.3829
2017-01-02 06:00:00	-99999	-1.56513	-15.9677	3.20803
2017-01-02 06:30:00	-99999	-0.60889	1.66629	-2.22129
2017-01-02 07:00:00	-99999	-0.384914	-5.77786	0.647964
2017-01-02 07:30:00	-99999	-1.71658	2.04835	0.859027
2017-01-02 08:00:00	-99999	-4.20137	8.85393	0.949084
2017-01-02 08:30:00	-99999	-0.698469	2.13631	2.62006
2017-01-02 09:00:00	-99999	-1.66963	6.26015	5.29873
2017-01-02 09:30:00	-99999	-61.8493	-15.9448	6.67868
2017-01-02 10:00:00	-99999	1.62289	5.40645	3.27763
2017-01-02 10:30:00	-99999	3.38374	-4.91966	1.13785
2017-01-02 11:00:00	-99999	7.15787	-25.1464	0.825393
2017-01-02 11:30:00	-99999	12.1003	-14.8204	1.47559
2017-01-02 12:00:00	-99999	7.57958	-4.33448	2.02907
2017-01-02 12:30:00	7.51501	2.37148	-10.3339	1.36792
2017-01-02 13:00:00	6.93428	27.3671	23.3754	1.68285
2017-01-02 13:30:00	1.46999	16.191	13.1716	0.323231
2017-01-02 14:00:00	0.765532	9.40984	3.41561	-0.387719
2017-01-02 14:30:00	1.09527	8.11816	-3.51381	-2.24888
2017-01-02 15:00:00	1.32897	4.88908	4.78901	2.20533
2017-01-02 15:30:00	6.76931	11.402	-6.03107	1.79692
2017-01-02 16:00:00	2.17797	13.0056	32.1742	-1.2884
2017-01-02 16:30:00	-0.742606	2.73649	-23.293	0.36558
2017-01-02 17:00:00	-0.247418	3.10454	-6.80254	-0.358214
2017-01-02 17:30:00	-3.59798	2.56721	15.7355	-2.52224
2017-01-02 18:00:00	-4.35315	-5.18869	2.55856	0.330039
2017-01-02 18:30:00	-5.00525	-2.47307	-23.1737	2.68326
2017-01-02 19:00:00	-3.78582	9.12845	-2.39241	3.14562
2017-01-02 19:30:00	7.10744	-23.2862	-3.98078	2.71765
2017-01-02 20:00:00	1.36806	-10.0546	-8.0891	0.8059
2017-01-02 20:30:00	1.03067	-4.27747	1.14154	-2.9658
2017-01-02 21:00:00	4.71867	-0.155694	6.29938	0.0169375
2017-01-02 21:30:00	1.65092	9.58743	5.11781	-1.51675
2017-01-02 22:00:00	1.82868	1.42712	-8.91099	0.89119
2017-01-02 22:30:00	4.10391	-5.15354	11.5769	0.553215
2017-01-02 23:00:00	6.97546	8.48147	2.74881	0.745003
2017-01-02 23:30:00	-6.1496	-11.4365	1.88589	0.80047
2017-01-03	1.9482	22.2941	6.54956	-0.51909
2017-01-03 00:30:00	2.75697	26.5896	8.20198	-1.29519
2017-01-03 01:00:00	3.22416	35.2949	3.01569	0.839358
2017-01-03 01:30:00	1.76122	26.6471	-8.2661	-1.75708
2017-01-03 02:00:00	9.43185	22.9532	-1.71812	-4.48452
2017-01-03 02:30:00	19.5777	30.0396	-0.736121	-1.31809
2017-01-03 03:00:00	10.8874	16.869	137.994	-2.84823
2017-01-03 03:30:00	9.06821	26.0463	-30.3887	2.12982
2017-01-03 04:00:00	4.16005	29.5356	10.4578	0.696726
2017-01-03 04:30:00	-99999	17.8772	2.11925	0.692579
2017-01-03 05:00:00	-99999	15.9939	-3.00866	0.197209
2017-01-03 05:30:00	-99999	14.5233	-33.5386	0.158286
2017-01-03 06:00:00	-99999	-99999	7.10058	0.23614
2017-01-03 06:30:00	-99999	-99999	27.8916	0.282812
2017-01-03 07:00:00	-99999	-99999	28.9948	0.890692
2017-01-03 07:30:00	-99999	-99999	29.5956	3.00976
2017-01-03 08:00:00	-99999	-99999	10.1683	-2.54661
2017-01-03 08:30:00	-99999	-99999	-1.99195	0.709564
2017-01-03 09:00:00	-99999	-99999	0.148906	4.08412
2017-01-03 09:30:00	-99999	-99999	-3.80195	3.28938
2017-01-03 10:00:00	-99999	-99999	-10.7158	1.97925
2017-01-03 10:30:00	-99999	-99999	-42.7847	1.14939
2017-01-03 11:00:00	-99999	-99999	-12.8721	1.97304
2017-01-03 11:30:00	16.2118	-99999	5.04043	0.988025
2017-01-03 12:00:00	16.0513	-99999	17.6673	1.63547
2017-01-03 12:30:00	31.4316	-99999	4.07921	0.327341
2017-01-03 13:00:00	17.4043	-99999	4.96971	-2.42074
2017-01-03 13:30:00	-5.62868	-99999	2.10702	-2.79824
2017-01-03 14:00:00	17.8821	-99999	27.2892	-1.2862
2017-01-03 14:30:00	17.0123	-99999	-11.1914	2.13282
2017-01-03 15:00:00	13.1856	-99999	-1.94003	3.48279
2017-01-03 15:30:00	15.7043	-99999	2.3436	1.43157
2017-01-03 16:00:00	14.0984	-99999	16.2271	5.31276
2017-01-03 16:30:00	17.1587	-99999	21.9537	3.8787
2017-01-03 17:00:00	13.6052	-2.95006	22.7904	5.28655
2017-01-03 17:30:00	17.5017	-4.47649	53.3986	5.10779
2017-01-03 18:00:00	26.4778	14.1787	42.7985	12.7032
2017-01-03 18:30:00	34.3095	3.51514	38.5727	6.538
2017-01-03 19:00:00	31.1509	2.00203	44.3896	12.327
2017-01-03 19:30:00	32.5454	6.84557	34.9632	-3.39146
2017-01-03 20:00:00	35.7115	20.0366	38.7442	20.678
2017-01-03 20:30:00	28.2654	104.903	52.65	27.3281
2017-01-03 21:00:00	35.968	19.6082	49.1025	9.38309
2017-01-03 21:30:00	10.7798	10.9712	28.043	30.4132
2017-01-03 22:00:00	13.0804	32.5121	23.3094	12.9705
2017-01-03 22:30:00	7.41473	22.143	23.8107	28.1178
2017-01-03 23:00:00	10.7339	12.0821	16.4969	11.3097
2017-01-03 23:30:00	12.5452	14.53	14.8215	13.2479
2017-01-04	18.9176	13.0245	11.6867	-1.26423
2017-01-04 00:30:00	10.6374	10.8483	7.27298	-1.6845
2017-01-04 01:00:00	8.27902	27.698	7.70045	-5.22872
2017-01-04 01:30:00	19.4007	36.3078	7.83336	-3.24908
2017-01-04 02:00:00	18.8384	20.0714	6.09308	13.9223
2017-01-04 02:30:00	16.803	17.8459	4.97374	3.37731
2017-01-04 03:00:00	12.3833	22.7544	15.3738	7.63164
2017-01-04 03:30:00	15.8732	21.2539	-105.622	1.52324
2017-01-04 04:00:00	13.9788	26.9442	1.62448	2.42159
2017-01-04 04:30:00	12.339	11.0129	-6.56464	4.73216
2017-01-04 05:00:00	11.3109	10.0987	5.16172	4.85897
2017-01-04 05:30:00	12.9591	6.91976	1.58589	6.70164
2017-01-04 06:00:00	13.0334	8.48729	-50.8085	9.08301
2017-01-04 06:30:00	9.98217	10.1171	3.56245	12.3974
2017-01-04 07:00:00	9.23463	12.6773	2.47396	-10.5119
2017-01-04 07:30:00	5.05804	29.3847	12.181	9.05267
2017-01-04 08:00:00	8.93963	34.0148	4.49538	7.92298
2017-01-04 08:30:00	23.1793	15.1446	1.49339	10.3333
2017-01-04 09:00:00	29.8437	25.9598	0.260592	11.7584
2017-01-04 09:30:00	22.7713	16.3821	7.33179	9.88111
2017-01-04 10:00:00	29.5923	14.1169	8.49963	10.1645
2017-01-04 10:30:00	36.4048	10.1127	-1.3516	22.6883
2017-01-04 11:00:00	23.8219	9.65023	7.81043	21.1133
2017-01-04 11:30:00	22.0512	10.5137	4.17277	13.4805
2017-01-04 12:00:00	16.3373	13.465	4.90431	2.0396
2017-01-04 12:30:00	14.1675	11.561	2.23171	12.9747
2017-01-04 13:00:00	13.0946	8.13288	16.1254	0.15628
2017-01-04 13:30:00	11.3833	3.52526	3.76599	-1.28047
2017-01-04 14:00:00	12.0607	2.27572	4.95411	-4.02189
2017-01-04 14:30:00	11.6803	2.47156	4.34283	12.9244
2017-01-04 15:00:00	8.99447	25.4319	14.9454	-14.736
2017-01-04 15:30:00	14.2171	23.3581	4.77375	1.44921
2017-01-04 16:00:00	16.8374	28.925	4.30491	16.6695
2017-01-04 16:30:00	18.3976	31.9095	7.10222	1.09558
2017-01-04 17:00:00	29.5109	28.5923	33.4727	27.9834
2017-01-04 17:30:00	30.7792	48.8634	43.0547	-3.38051
2017-01-04 18:00:00	48.1755	35.4666	-36.9892	-0.714367
2017-01-04 18:30:00	47.0452	40.3164	-2.15005	1.59648
2017-01-04 19:00:00	41.0923	54.4297	-32.1572	1.52031
2017-01-04 19:30:00	44.3852	38.4694	13.2411	-0.240433
2017-01-04 20:00:00	41.3794	38.037	9.08088	-0.270768
2017-01-04 20:30:00	31.8856	28.1414	11.2365	-0.976099
2017-01-04 21:00:00	26.1123	28.8796	10.9078	-0.0297269
2017-01-04 21:30:00	33.3468	24.2327	1.79453	8.09169
2017-01-04 22:00:00	29.3551	17.9741	-18.3452	9.19864
2017-01-04 22:30:00	28.1871	-31.7444	6.21492	1.40026
2017-01-04 23:00:00	23.1402	1.77363	30.2808	-3.99155
2017-01-04 23:30:00	7.9699	-3.42513	39.5978	18.0231
2017-01-05	11.0143	0.193622	18.9577	6.24107
2017-01-05 00:30:00	6.20866	-0.293118	-0.791274	-6.30979
2017-01-05 01:00:00	7.67877	-0.301576	8.17721	1.32225
2017-01-05 01:30:00	14.3614	0.590035	13.7027	0.119471
2017-01-05 02:00:00	7.89409	-11.0225	20.5017	-2.72663
2017-01-05 02:30:00	9.95199	0.305455	-3.60031	7.80113
2017-01-05 03:00:00	7.7553	-3.72719	7.72044	-9.20759
2017-01-05 03:30:00	7.99242	-0.639709	9.57577	0.900556
2017-01-05 04:00:00	-2.91673	-2.3586	-0.405387	0.77469
2017-01-05 04:30:00	9.94274	-0.219513	10.9144	-11.3914
2017-01-05 05:00:00	8.71674	-4.12767	19.1965	12.2348
2017-01-05 05:30:00	11.1349	-3.64557	2.21317	1.11009
2017-01-05 06:00:00	10.2812	17.704	13.7934	5.54224
2017-01-05 06:30:00	9.22798	0.976562	9.78202	4.50444
2017-01-05 07:00:00	10.5028	0.00246712	4.64046	2.86259
2017-01-05 07:30:00	11.8109	1.44921	4.92724	3.10842
2017-01-05 08:00:00	7.16844	3.91653	9.00852	7.28264
2017-01-05 08:30:00	12.4629	2.18913	1.88518	4.97534
2017-01-05 09:00:00	12.2699	2.39173	4.0439	5.48756
2017-01-05 09:30:00	17.416	-99999	2.91759	16.1887
2017-01-05 10:00:00	18.5367	-99999	1.93399	4.20084
2017-01-05 10:30:00	8.69674	-99999	-13.4793	4.77965
2017-01-05 11:00:00	12.4335	-99999	-0.943449	1.68942
2017-01-05 11:30:00	8.95926	-99999	2.88033	2.76965
2017-01-05 12:00:00	4.94031	-99999	-2.68737	5.83406
2017-01-05 12:30:00	4.98789	-99999	-1.9732	2.02751
2017-01-05 13:00:00	13.978	-99999	2.94913	0.25701
2017-01-05 13:30:00	10.7563	-99999	2.71069	2.91962
2017-01-05 14:00:00	10.42	-99999	5.41038	0.887019
2017-01-05 14:30:00	9.15577	-99999	2.38791	4.00083
2017-01-05 15:00:00	3.61318	-99999	-1.25344	5.03083
2017-01-05 15:30:00	0.787336	-99999	-0.528896	7.10092
2017-01-05 16:00:00	2.74585	-99999	-4.2829	19.2668
2017-01-05 16:30:00	2.61803	-99999	-0.388842	20.4464
2017-01-05 17:00:00	-1.71012	4.7015	-0.0486828	10.1864
2017-01-05 17:30:00	3.22776	8.35043	-3.12453	0.48152
2017-01-05 18:00:00	2.84388	14.4443	2.93275	-1.02616
2017-01-05 18:30:00	0.712782	16.1041	-1.62206	0.180153
2017-01-05 19:00:00	1.87625	14.5966	9.16686	4.76165
2017-01-05 19:30:00	1.67904	15.4546	6.50924	4.45488
2017-01-05 20:00:00	1.8338	12.5352	7.2314	-1.60752
2017-01-05 20:30:00	4.71679	4.35711	-4.66134	0.514417
2017-01-05 21:00:00	4.29307	12.1732	3.48641	-1.09819
2017-01-05 21:30:00	3.00345	13.3691	0.395772	0.152657
2017-01-05 22:00:00	2.53755	4.80829	10.4371	0.39852
2017-01-05 22:30:00	0.977396	10.7689	-31.9736	0.861936
2017-01-05 23:00:00	-1.77096	11.5889	1.97068	-0.0378401
2017-01-05 23:30:00	-1.97693	2.77328	9.66486	2.70987
2017-01-06	0.407657	6.62899	0.622949	1.36653
2017-01-06 00:30:00	-0.942696	0.792095	-3.59508	2.59804
2017-01-06 01:00:00	0.656775	1.89678	1.31457	2.54412
2017-01-06 01:30:00	1.20296	5.71819	1.0908	1.83938
2017-01-06 02:00:00	1.30895	3.12661	-2.06958	0.990274
2017-01-06 02:30:00	1.08588	3.20942	-1.24035	0.46882
2017-01-06 03:00:00	1.98395	3.4382	-0.701264	0.656558
2017-01-06 03:30:00	2.28211	-1.18825	-0.322991	0.916681
2017-01-06 04:00:00	3.20223	1.00996	-0.0124748	-12.3053
2017-01-06 04:30:00	3.85465	2.84619	0.456123	4.36401
2017-01-06 05:00:00	6.48809	-1.77431	2.02682	-7.87328
2017-01-06 05:30:00	3.15333	0.161432	0.174921	1.78812
2017-01-06 06:00:00	1.73967	-99999	0.300253	24.2404
2017-01-06 06:30:00	0.049198	-99999	2.87189	-3.03962
2017-01-06 07:00:00	0.904688	-99999	6.14443	-4.45533
2017-01-06 07:30:00	2.3985	-99999	-3.6833	-7.41451
2017-01-06 08:00:00	3.67935	-99999	14.8409	8.91131
2017-01-06 08:30:00	4.52454	-99999	2.81771	1.83099
2017-01-06 09:00:00	0.595355	-99999	-6.37608	-4.69973
2017-01-06 09:30:00	1.08073	0.0369517	-4.04952	24.0164
2017-01-06 10:00:00	-0.371795	0.865686	-10.5739	-31.9917
2017-01-06 10:30:00	-0.689282	1.1934	3.73405	-1.38206
2017-01-06 11:00:00	-0.811684	-4.78525	-4.45754	0.804469
2017-01-06 11:30:00	-2.06665	-1.14544	-9.05235	-5.38437
2017-01-06 12:00:00	3.22845	-3.83014	-10.7992	3.61873
2017-01-06 12:30:00	-4.24531	-6.01386	-9.10927	20.0273
2017-01-06 13:00:00	0.0365599	-6.78819	-11.0189	16.6127
2017-01-06 13:30:00	-1.08978	-5.51098	-9.67471	6.03798
2017-01-06 14:00:00	4.27121	-8.59442	-10.0387	3.40675
2017-01-06 14:30:00	6.50434	-3.54224	-11.9923	9.11088
2017-01-06 15:00:00	8.56485	-0.410888	-12.9619	10.8528
2017-01-06 15:30:00	11.0809	2.82699	-5.39087	5.91698
2017-01-06 16:00:00	9.77855	4.08585	2.13269	4.79741
2017-01-06 16:30:00	10.8124	6.45447	5.76959	3.97646
2017-01-06 17:00:00	10.4756	9.65079	8.78666	19.5996
2017-01-06 17:30:00	15.3376	5.61879	11.1341	18.3381
2017-01-06 18:00:00	8.56583	4.54665	5.90674	14.7979
2017-01-06 18:30:00	8.93291	3.31749	2.6659	6.1699
2017-01-06 19:00:00	-6.75256	-0.660636	-0.701447	2.87728
2017-01-06 19:30:00	-99999	5.9178	5.24241	1.5766
2017-01-06 20:00:00	-99999	1.24665	6.77351	-0.155976
2017-01-06 20:30:00	-99999	-1.61968	12.5302	0.240111
2017-01-06 21:00:00	-99999	-3.68292	5.06355	-1.12864
2017-01-06 21:30:00	-99999	-5.14725	-3.86385	-0.297396
2017-01-06 22:00:00	-99999	0.557244	-5.52424	-2.06037
2017-01-06 22:30:00	-99999	-0.129151	-6.29128	-1.44128
2017-01-06 23:00:00	-99999	-2.25305	-5.53075	-0.0874019
2017-01-06 23:30:00	-99999	-2.66391	-5.71015	0.780078
2017-01-07	-99999	-5.36901	-6.52952	-0.538738
2017-01-07 00:30:00	-99999	-5.34446	-6.36103	0.758583
2017-01-07 01:00:00	-99999	-3.46139	-8.24582	-1.71354
2017-01-07 01:30:00	-99999	-3.97402	-7.33547	1.3929
2017-01-07 02:00:00	-99999	-3.25351	-5.14781	-1.09305
2017-01-07 02:30:00	-99999	0.0146457	-3.74716	-2.64912
2017-01-07 03:00:00	-99999	-3.29642	-4.15744	-2.67829
2017-01-07 03:30:00	-99999	-2.13215	-4.05608	0.972292
2017-01-07 04:00:00	-99999	-2.19545	-2.1374	-12.6822
2017-01-07 04:30:00	-99999	-0.993266	-5.04128	-1.26542
2017-01-07 05:00:00	-99999	-1.51321	-3.06558	-1.45045
2017-01-07 05:30:00	-99999	-22.0975	-1.26002	2.66591
2017-01-07 06:00:00	-99999	-7.29855	-3.40613	-1.50601
2017-01-07 06:30:00	-99999	-4.61696	-2.16818	-2.01718
2017-01-07 07:00:00	-99999	9.4163	-2.16204	-1.01449
2017-01-07 07:30:00	-99999	-28.4721	-1.57419	-2.82766
2017-01-07 08:00:00	-99999	-2.99295	-5.87011	52.5384
2017-01-07 08:30:00	-99999	-5.49971	-1.72459	-10.62
2017-01-07 09:00:00	-99999	26.1298	-0.0859666	-4.30637
2017-01-07 09:30:00	-99999	-4.79363	-5.47714	0.620287
2017-01-07 10:00:00	-99999	3.1578	0.468272	-5.27566
2017-01-07 10:30:00	-99999	0.236794	-4.51754	6.18637
2017-01-07 11:00:00	-99999	5.96	-20.2735	-0.944039
2017-01-07 11:30:00	-99999	9.61549	-8.21171	15.706
2017-01-07 12:00:00	-99999	2.16368	-20.1414	-9.62777
2017-01-07 12:30:00	-99999	0.971107	8.46546	5.28119
2017-01-07 13:00:00	-99999	-0.586125	1.78916	5.3292
2017-01-07 13:30:00	-99999	-1.0334	-17.8947	3.08544
2017-01-07 14:00:00	-7.24092	-0.271715	-15.9495	7.13022
2017-01-07 14:30:00	-8.11896	3.21922	-1.93702	-1.13486
2017-01-07 15:00:00	-4.85566	-0.838795	-6.30256	10.542
2017-01-07 15:30:00	1.13432	-2.42278	-4.93461	4.95619
2017-01-07 16:00:00	6.40369	-0.193127	23.9399	6.42141
2017-01-07 16:30:00	4.87462	-0.141391	33.8518	12.5468
2017-01-07 17:00:00	8.45224	0.863686	-28.1373	8.36001
2017-01-07 17:30:00	8.36674	0.71412	0.846773	19.5317
2017-01-07 18:00:00	3.69667	3.54826	0.145169	16.9755
2017-01-07 18:30:00	3.40657	5.77223	2.03703	10.8289
2017-01-07 19:00:00	3.8388	3.88517	-26.0875	5.1234
2017-01-07 19:30:00	3.29335	7.15735	-7.48749	4.29599
2017-01-07 20:00:00	-0.606117	4.97174	0.564454	3.90676
2017-01-07 20:30:00	0.0728237	5.65827	0.985414	3.4809
2017-01-07 21:00:00	-1.5264	4.00473	-40.0481	2.87079
2017-01-07 21:30:00	-1.38884	0.725418	-5.66063	1.9258
2017-01-07 22:00:00	-1.6304	1.54586	-2.34162	-0.83938
2017-01-07 22:30:00	-0.943594	-0.293435	1.82567	1.09608
2017-01-07 23:00:00	-2.10178	-0.691539	0.486352	1.76671
2017-01-07 23:30:00	-0.584424	-0.576702	1.32842	1.85732
2017-01-08	-0.870443	-0.506145	-0.00242724	1.49302
2017-01-08 00:30:00	-0.307825	-1.18726	-1.7512	1.77673
2017-01-08 01:00:00	-5.99074	-0.0131019	-7.64092	1.22522
2017-01-08 01:30:00	-0.455507	-0.237234	-2.1326	1.44516
2017-01-08 02:00:00	-2.21631	-0.99924	-3.03818	1.31575
2017-01-08 02:30:00	-1.4133	-1.00167	-4.93803	1.31015
2017-01-08 03:00:00	-0.135693	-1.99634	-4.09921	1.06417
2017-01-08 03:30:00	-1.41141	-1.25833	-2.51654	1.49071
2017-01-08 04:00:00	-2.17411	-0.698892	-1.794	1.11598
2017-01-08 04:30:00	-2.23921	-1.02759	-1.05844	-1.05059
2017-01-08 05:00:00	-0.965022	-1.08317	-9.99873	3.33446
2017-01-08 05:30:00	-0.991196	3.39295	-1.21427	0.768057
2017-01-08 06:00:00	-0.729106	-5.71963	-0.305697	0.369735
2017-01-08 06:30:00	-0.683433	-3.91754	-7.92236	-0.45086
2017-01-08 07:00:00	-1.03826	-4.67835	-4.22686	2.04667
2017-01-08 07:30:00	-0.601753	-3.21739	-3.9293	1.85415
2017-01-08 08:00:00	-0.700192	-3.35055	-10.8595	1.79137
2017-01-08 08:30:00	-0.305249	30.3385	-1.81989	1.0788
2017-01-08 09:00:00	0.0741604	-3.78553	-4.10058	0.65416
2017-01-08 09:30:00	-0.473641	-3.4333	-1.60629	0.850362
2017-01-08 10:00:00	-0.458708	-2.52589	-2.82039	0.603636
2017-01-08 10:30:00	-0.299448	-4.07594	-5.51551	1.71897
2017-01-08 11:00:00	-0.28612	-4.46815	-10.3025	0.474889
2017-01-08 11:30:00	2.909	-4.06145	-7.46641	-0.546319
2017-01-08 12:00:00	7.93383	-4.87482	-7.03956	0.872022
2017-01-08 12:30:00	9.93804	-8.16192	-5.3935	0.208574
2017-01-08 13:00:00	6.21345	-6.72055	-9.22645	-10.5243
2017-01-08 13:30:00	5.54831	-8.74475	-5.30655	1.12181
2017-01-08 14:00:00	9.35554	-8.48752	-7.92361	0.523693
2017-01-08 14:30:00	5.64446	-3.96373	-5.47486	-2.86796
2017-01-08 15:00:00	8.13839	1.16448	-2.29923	9.20053
2017-01-08 15:30:00	-2.511	4.72869	1.92124	7.49619
2017-01-08 16:00:00	0.373254	5.72954	11.5952	13.3761
2017-01-08 16:30:00	7.48867	3.78926	13.6817	4.43132
2017-01-08 17:00:00	7.17936	-5.1348	8.12148	-0.421372
2017-01-08 17:30:00	10.4974	6.66049	13.6088	1.63582
2017-01-08 18:00:00	1.52569	0.985345	14.7998	0.457725
2017-01-08 18:30:00	10.8606	11.4038	7.88122	2.10818
2017-01-08 19:00:00	2.82404	4.95564	9.36441	0.324142
2017-01-08 19:30:00	4.12512	5.37561	7.65596	-1.35241
2017-01-08 20:00:00	0.36282	-0.566176	4.31713	-2.56795
2017-01-08 20:30:00	-2.57822	2.91674	2.68247	-4.50787
2017-01-08 21:00:00	-0.875462	2.28658	2.59522	-7.17078
2017-01-08 21:30:00	-0.387702	0.678032	1.62753	-10.4357
2017-01-08 22:00:00	0.11604	-2.28861	-1.13868	-13.727
2017-01-08 22:30:00	-1.93174	-2.00567	-3.60932	-14.1488
2017-01-08 23:00:00	-2.11234	-3.18319	-5.19256	-6.95602
2017-01-08 23:30:00	-1.74034	-6.18982	-4.77328	-3.81869
2017-01-09	-2.17447	-5.00687	-6.99463	-3.04614
2017-01-09 00:30:00	-99999	-5.61423	-11.8613	-1.19573
2017-01-09 01:00:00	-99999	-8.16008	-7.73288	0.0542041
2017-01-09 01:30:00	-3.17094	-4.96515	-2.57689	-1.19997
2017-01-09 02:00:00	-4.58176	-5.93482	-2.6668	-6911.5
2017-01-09 02:30:00	-3.26256	-5.2617	-3.79158	-5.75173
2017-01-09 03:00:00	-99999	-99999	0.599269	-1.71201
2017-01-09 03:30:00	-99999	-99999	-1.57918	-2.60863
2017-01-09 04:00:00	-99999	-99999	-11.6019	119.876
2017-01-09 04:30:00	-99999	3.3564	0.110857	-2.96068
2017-01-09 05:00:00	-99999	-0.908024	0.227382	-2.62731
2017-01-09 05:30:00	-99999	-0.815839	3.11889	-1.86778
2017-01-09 06:00:00	-99999	0.536128	0.130214	-2.1137
2017-01-09 06:30:00	-99999	-0.861426	-0.057479	5.6285
2017-01-09 07:00:00	-99999	-1.0939	-0.60543	2.73101
2017-01-09 07:30:00	-99999	-1.66129	-0.19838	4.25585
2017-01-09 08:00:00	-99999	-2.0668	0.0326067	4.37443
2017-01-09 08:30:00	-99999	4.01438	-2.70888	4.77822
2017-01-09 09:00:00	-99999	6.70245	2.07852	-0.94946
2017-01-09 09:30:00	-99999	12.4499	-10.9997	-3.30454
2017-01-09 10:00:00	-99999	30.9315	-19.8938	-4.81718
2017-01-09 10:30:00	-99999	29.212	3.51554	-4.69045
2017-01-09 11:00:00	-99999	26.6242	-0.639561	-4.16101
2017-01-09 11:30:00	-99999	23.1966	18.1794	-5.96661
2017-01-09 12:00:00	-99999	13.4516	-38.597	-7.38126
2017-01-09 12:30:00	-99999	15.7566	-6.01034	-7.63686
2017-01-09 13:00:00	-99999	12.4408	-8.19382	-6.52254
2017-01-09 13:30:00	-99999	6.03876	0.582041	-1.82731
2017-01-09 14:00:00	-99999	3.50458	-10.2223	-5.80624
2017-01-09 14:30:00	-99999	5.76628	-5.48171	-10.9507
2017-01-09 15:00:00	-13.8029	5.08238	-12.1806	-3.92348
2017-01-09 15:30:00	-4.71814	16.7695	1.88601	3.99898
2017-01-09 16:00:00	3.45533	8.2036	3.04126	1.78391
2017-01-09 16:30:00	12.6955	1.93096	-23.53	-0.458443
2017-01-09 17:00:00	19.6641	14.405	-95.1642	-2.45964
2017-01-09 17:30:00	28.3056	21.9764	16.9092	-1.9784
2017-01-09 18:00:00	27.7392	28.9082	6.06319	-1.13997
2017-01-09 18:30:00	30.1386	12.1142	-8.01047	0.414498
2017-01-09 19:00:00	22.2783	6.93668	-8.87114	2.58211
2017-01-09 19:30:00	9.61316	2.73333	6.12762	3.42182
2017-01-09 20:00:00	1.80471	4.14711	4.14898	3.32944
2017-01-09 20:30:00	-0.318969	4.34058	-14.271	15.645
2017-01-09 21:00:00	12.0877	2.55474	-0.899405	3.53478
2017-01-09 21:30:00	15.9607	1.04181	0.987109	-14.4929
2017-01-09 22:00:00	22.4414	1.36493	0.150064	0.551829
2017-01-09 22:30:00	15.6778	1.88311	2.18907	-0.235665
2017-01-09 23:00:00	16.3211	5.51509	-51.8685	0.427167
2017-01-09 23:30:00	19.7673	10.8069	0.368366	-1.77955
2017-01-10	18.1626	10.1293	-4.16862	-0.149251
2017-01-10 00:30:00	14.4986	9.65697	4.33692	3.62654
2017-01-10 01:00:00	15.7679	6.98435	-10.6194	1.77174
2017-01-10 01:30:00	14.2444	7.74859	1.59229	1.52741
2017-01-10 02:00:00	8.30767	9.96737	8.08866	0.516457
2017-01-10 02:30:00	5.74769	4.6346	-1.92895	8.64644
2017-01-10 03:00:00	5.07236	6.73423	1.65911	15.6341
2017-01-10 03:30:00	6.26475	6.67499	4.078	3.58915
2017-01-10 04:00:00	3.00106	6.44181	1.56779	4.41336
2017-01-10 04:30:00	4.43388	11.1991	3.10973	3.80455
2017-01-10 05:00:00	3.38404	4.09574	-21.7594	6.07459
2017-01-10 05:30:00	4.47683	0.732582	1.71729	5.85613
2017-01-10 06:00:00	1.20382	-1.42776	-1.82192	-9.77747
2017-01-10 06:30:00	0.948193	-2.5808	-3.27482	2.74115
2017-01-10 07:00:00	1.82819	2.39407	2.88547	-0.440502
2017-01-10 07:30:00	3.08091	11.7416	2.86475	3.95076
2017-01-10 08:00:00	5.3561	9.55644	3.70101	4.58136
2017-01-10 08:30:00	7.12356	9.3983	3.88507	-1.68161
2017-01-10 09:00:00	7.66309	5.34791	8.17006	-4.24134
2017-01-10 09:30:00	9.68313	18.3677	22.5205	0.0569259
2017-01-10 10:00:00	9.39345	9.14391	23.8073	-2.49234
2017-01-10 10:30:00	10.863	18.7838	16.501	-0.229437
2017-01-10 11:00:00	21.0912	12.4533	30.8596	-1.80257
2017-01-10 11:30:00	-0.499191	41.9452	40.045	-0.451416
2017-01-10 12:00:00	13.3629	37.095	22.5141	1.55576
2017-01-10 12:30:00	12.6908	34.6646	20.332	-0.591325
2017-01-10 13:00:00	9.60927	48.7745	-20.6477	-1.02936
2017-01-10 13:30:00	5.68034	29.7683	-31.7593	1.32005
2017-01-10 14:00:00	5.90546	41.3496	-49.6754	-3.02891
2017-01-10 14:30:00	-3.20928	38.2645	-87.3635	3.74024
2017-01-10 15:00:00	0.58061	-99999	59.4504	0.764205
2017-01-10 15:30:00	21.2257	27.1176	-17.812	-15.2928
2017-01-10 16:00:00	18.053	19.0542	25.9326	10.709
2017-01-10 16:30:00	19.056	24.3119	-47.3361	13.5948
2017-01-10 17:00:00	19.4162	24.5607	-16.3074	15.079
2017-01-10 17:30:00	35.4943	21.325	93.4806	3.40617
2017-01-10 18:00:00	34.6821	28.6102	-40.8941	4.02497
2017-01-10 18:30:00	27.7058	6.1576	-86.8831	-0.00499172
2017-01-10 19:00:00	43.0017	1.7003	-120.459	5.7166
2017-01-10 19:30:00	35.4016	-19.8658	12.6694	-3.12285
2017-01-10 20:00:00	46.0774	-25.4656	15.3297	-16.7804
2017-01-10 20:30:00	-2.40505	-1.8129	12.3422	-3.53684
2017-01-10 21:00:00	-4.80594	25.8702	10.2272	-15.3495
2017-01-10 21:30:00	17.38	6.92141	85.2933	8.83988
2017-01-10 22:00:00	3.24462	5.14406	42.8317	7.37712
2017-01-10 22:30:00	24.355	-4.6436	41.6721	-3.42961
2017-01-10 23:00:00	25.3061	4.34233	35.3129	3.84827
2017-01-10 23:30:00	25.0316	4.66369	16.4809	-2.06993
2017-01-11	37.0888	5.00682	20.4734	9.93525
2017-01-11 00:30:00	15.5495	3.33082	14.1408	10.1868
2017-01-11 01:00:00	18.9578	3.64523	11.8776	25.9663
2017-01-11 01:30:00	34.8139	5.13891	15.314	34.0698
2017-01-11 02:00:00	36.1386	4.07651	7.94878	28.1467
2017-01-11 02:30:00	30.6547	6.38412	6.21705	41.8515
2017-01-11 03:00:00	33.6742	4.37274	7.78684	-10.2099
2017-01-11 03:30:00	42.4147	5.54458	8.68764	3.92162
2017-01-11 04:00:00	37.7906	12.285	7.72234	10.1586
2017-01-11 04:30:00	26.0382	22.6333	17.1843	26.7215
2017-01-11 05:00:00	41.4719	18.3496	46.8037	28.2925
2017-01-11 05:30:00	43.0165	17.9559	40.1225	20.6839
2017-01-11 06:00:00	43.5435	10.2227	37.0001	10.6827
2017-01-11 06:30:00	35.2973	7.03986	52.9569	17.9495
2017-01-11 07:00:00	38.3293	21.1238	47.3933	11.0586
2017-01-11 07:30:00	40.6686	26.9145	77.4322	9.73893
2017-01-11 08:00:00	45.5138	19.9562	67.703	8.6545
2017-01-11 08:30:00	44.4985	7.22584	60.4314	6.60424
2017-01-11 09:00:00	34.2305	22.6037	55.188	14.7967
2017-01-11 09:30:00	40.8744	13.9648	38.977	9.83802
2017-01-11 10:00:00	35.4393	22.0057	36.5646	59.7556
2017-01-11 10:30:00	30.2109	39.1708	16.388	13.7831
2017-01-11 11:00:00	20.7661	35.3575	27.9799	11.6378
2017-01-11 11:30:00	28.5461	22.703	28.8769	13.2909
2017-01-11 12:00:00	28.0441	32.927	20.2997	24.7354
2017-01-11 12:30:00	20.2093	38.0264	37.7952	18.6242
2017-01-11 13:00:00	18.0669	25.9841	29.2024	14.6936
2017-01-11 13:30:00	23.8302	20.3932	36.0393	7.0102
2017-01-11 14:00:00	25.4564	28.6953	29.1207	14.3525
2017-01-11 14:30:00	23.9205	13.6055	37.0405	14.5585
2017-01-11 15:00:00	30.8789	16.1425	62.1448	16.3662
2017-01-11 15:30:00	36.6885	13.5212	36.0139	12.1299
2017-01-11 16:00:00	41.2487	100.966	48.726	14.4584
2017-01-11 16:30:00	30.9604	76.5495	56.3926	15.9429
2017-01-11 17:00:00	46.3241	88.626	47.6439	14.2063
2017-01-11 17:30:00	54.8987	87.6009	45.4111	36.6739
2017-01-11 18:00:00	50.8579	93.7471	55.4264	15.4699
2017-01-11 18:30:00	36.4794	77.0636	48.2265	15.8895
2017-01-11 19:00:00	43.4872	95.4712	63.1123	23.7848
2017-01-11 19:30:00	56.4888	90.9118	74.66	23.9967
2017-01-11 20:00:00	54.6926	72.0272	-3.88707	14.6916
2017-01-11 20:30:00	56.8648	86.635	-8.99511	0.37487
2017-01-11 21:00:00	49.1187	53.2097	-128.779	19.7978
2017-01-11 21:30:00	49.1253	38.1088	199.119	-24.7336
2017-01-11 22:00:00	38.89	42.4653	-12.5984	33.3231
2017-01-11 22:30:00	28.5082	-17.9057	21.1596	1.20588
2017-01-11 23:00:00	55.8006	21.9326	14.1032	-14.7464
2017-01-11 23:30:00	29.6047	7.86619	27.0368	-60.8829
2017-01-12	23.9646	2.10852	9.16312	45.9419
2017-01-12 00:30:00	23.7421	-6.70845	6.45091	6.66909
2017-01-12 01:00:00	-0.405526	-1.97553	20.5414	-8.10161
2017-01-12 01:30:00	-2.63373	1.21554	-14.9505	3.96246
2017-01-12 02:00:00	3.82805	-15.5591	7.27916	6.14436
2017-01-12 02:30:00	11.0002	-3.55927	7.05729	0.638265
2017-01-12 03:00:00	-8.33778	-0.231837	13.1691	5.18422
2017-01-12 03:30:00	0.321927	4.33829	-5.43871	6.27326
2017-01-12 04:00:00	1.65852	3.19381	4.34962	6.76984
2017-01-12 04:30:00	11.806	5.69602	3.49625	8.14364
2017-01-12 05:00:00	0.356131	5.0923	11.3219	9.00324
2017-01-12 05:30:00	0.622058	4.57367	16.457	25.3744
2017-01-12 06:00:00	4.3313	10.7384	16.7407	14.947
2017-01-12 06:30:00	5.84156	19.8278	14.1822	-0.184262
2017-01-12 07:00:00	8.45669	20.8821	20.2385	4.45385
2017-01-12 07:30:00	11.1682	11.0672	19.6808	7.98202
2017-01-12 08:00:00	22.9332	13.1154	22.313	5.57199
2017-01-12 08:30:00	36.4035	9.15419	24.1751	2.21856
2017-01-12 09:00:00	2.29628	12.4543	20.2506	3.61754
2017-01-12 09:30:00	-99999	36.214	7.36416	8.99937
2017-01-12 10:00:00	-99999	33.3071	17.5019	-52.4707
2017-01-12 10:30:00	-99999	17.1045	17.9409	-16.2462
2017-01-12 11:00:00	-3.28718	22.9451	26.8381	12.2651
2017-01-12 11:30:00	43.7086	17.906	18.5143	1.40065
2017-01-12 12:00:00	15.8061	8.79923	26.4815	-39.9798
2017-01-12 12:30:00	15.3747	2.62139	35.35	30.0394
2017-01-12 13:00:00	5.91345	0.0136394	31.6597	66.8569
2017-01-12 13:30:00	10.7292	-3.30885	26.2822	19.7502
2017-01-12 14:00:00	7.37445	-4.6587	12.6876	85.4355
2017-01-12 14:30:00	2.26029	-4.79266	3.62811	11.8824
2017-01-12 15:00:00	15.8682	-4.9538	3.93401	2.80154
2017-01-12 15:30:00	8.05134	-1.34531	6.89907	15.0024
2017-01-12 16:00:00	18.5546	1.37745	7.42458	3.00323
2017-01-12 16:30:00	43.5593	1.26387	13.1787	27.7519
2017-01-12 17:00:00	46.5467	4.32122	20.9117	21.3205
2017-01-12 17:30:00	48.2554	8.43088	22.5878	50.112
2017-01-12 18:00:00	50.8514	11.7796	22.5587	83.765
2017-01-12 18:30:00	62.1802	8.92085	16.8202	69.7275
2017-01-12 19:00:00	70.1584	8.58501	24.8186	96.5206
2017-01-12 19:30:00	65.6133	10.4633	18.0432	93.8887
2017-01-12 20:00:00	70.4556	15.4046	6.98697	103.899
2017-01-12 20:30:00	90.3547	8.66812	17.6559	88.2232
2017-01-12 21:00:00	101.608	5.82713	12.2846	84.2749
2017-01-12 21:30:00	111.215	-1.77706	41.375	71.964
2017-01-12 22:00:00	109.842	-0.963043	28.8586	72.3158
2017-01-12 22:30:00	115.288	1.20464	97.239	61.2103
2017-01-12 23:00:00	111.236	2.64419	48.1818	38.6642
2017-01-12 23:30:00	102.197	-0.34667	65.974	23.7387
2017-01-13	98.2496	4.03303	55.7328	66.3758
2017-01-13 00:30:00	86.7814	7.75906	63.7666	61.8445
2017-01-13 01:00:00	83.5893	1.62339	55.5878	71.662
2017-01-13 01:30:00	72.7923	-2.14932	80.8957	71.8362
2017-01-13 02:00:00	54.4101	17.2026	64.038	46.3844
2017-01-13 02:30:00	55.5309	13.4875	65.0535	47.9477
2017-01-13 03:00:00	58.1791	40.7907	24.4134	65.4419
2017-01-13 03:30:00	75.6266	61.671	29.2832	83.393
2017-01-13 04:00:00	74.776	-1.36702	131.651	67.827
2017-01-13 04:30:00	72.8408	58.0676	44.6903	56.2935
2017-01-13 05:00:00	60.7548	-25.7405	12.2685	67.4978
2017-01-13 05:30:00	61.7766	-6.07006	25.689	59.0857
2017-01-13 06:00:00	43.0259	-2.30632	7.62046	54.5437
2017-01-13 06:30:00	44.1221	2.0531	14.2297	53.637
2017-01-13 07:00:00	51.5788	-9.83348	19.2301	48.0485
2017-01-13 07:30:00	62.0872	-0.853233	11.766	48.3576
2017-01-13 08:00:00	54.4323	-1.21128	8.91169	53.6404
2017-01-13 08:30:00	75.1961	-13.7172	-9.1118	46.7319
2017-01-13 09:00:00	81.9291	-9.73118	6.50138	41.431
2017-01-13 09:30:00	71.0061	-15.0547	0.516784	38.8003
2017-01-13 10:00:00	55.8197	-11.5772	5.03399	31.8101
2017-01-13 10:30:00	20.3435	6.04344	10.9919	19.4627
2017-01-13 11:00:00	17.5936	-37.8058	4.94211	10.8944
2017-01-13 11:30:00	54.3848	-8.56637	12.5774	9.38778
2017-01-13 12:00:00	-2.13361	-9.47797	6.81056	21.5428
2017-01-13 12:30:00	0.888312	-9.84316	-6.02944	15.9855
2017-01-13 13:00:00	6.16058	-6.40123	16.8246	13.6598
2017-01-13 13:30:00	7.76479	-7.59621	5.36022	24.3425
2017-01-13 14:00:00	14.4985	7.22691	17.3778	16.8158
2017-01-13 14:30:00	21.2508	6.17073	19.8642	3.41242
2017-01-13 15:00:00	16.4405	-7.61891	21.4618	-1.71999
2017-01-13 15:30:00	4.42221	-7.19808	15.571	15.4221
2017-01-13 16:00:00	7.53215	-0.190041	20.8792	6.99838
2017-01-13 16:30:00	12.9392	-6.7021	27.8893	14.8086
2017-01-13 17:00:00	45.7464	-1.26695	36.0259	61.0879
2017-01-13 17:30:00	36.7934	-0.778073	45.3301	50.758
2017-01-13 18:00:00	40.284	1.79306	46.7183	41.1684
2017-01-13 18:30:00	52.9829	-0.91456	44.2211	69.5847
2017-01-13 19:00:00	43.4634	3.70174	35.9638	97.3837
2017-01-13 19:30:00	61.8681	2.11069	37.6995	64.4124
2017-01-13 20:00:00	58.4264	0.95948	11.6401	41.1092
2017-01-13 20:30:00	66.392	4.78788	29.7561	49.8419
2017-01-13 21:00:00	50.2156	8.06715	22.2785	58.7007
2017-01-13 21:30:00	48.6866	6.81372	4.37545	38.4582
2017-01-13 22:00:00	53.0853	8.14434	25.3517	38.8152
2017-01-13 22:30:00	47.9484	0.704658	13.5945	43.3999
2017-01-13 23:00:00	37.6718	0.299538	0.470801	20.4847
2017-01-13 23:30:00	53.3898	-0.159289	14.3453	39.0054
2017-01-14	58.0219	0.158242	7.46659	40.5743
2017-01-14 00:30:00	44.1846	-2.97899	17.9653	40.8866
2017-01-14 01:00:00	47.8917	-5.33918	2.49281	31.9559
2017-01-14 01:30:00	43.9112	1.5767	-31.5036	40.682
2017-01-14 02:00:00	30.5236	-4.93018	65.3883	41.6128
2017-01-14 02:30:00	38.2221	10.3907	82.9372	54.7709
2017-01-14 03:00:00	59.4265	-10.5522	13.123	39.5571
2017-01-14 03:30:00	73.7918	13.9078	49.4184	50.9312
2017-01-14 04:00:00	55.112	1.33619	32.512	47.1769
2017-01-14 04:30:00	58.0211	-3.19532	71.9064	48.4518
2017-01-14 05:00:00	55.515	0.421623	68.7029	43.8118
2017-01-14 05:30:00	47.693	0.423703	67.0881	35.2816
2017-01-14 06:00:00	51.1095	-6.65689	48.7427	27.2413
2017-01-14 06:30:00	59.3447	-7.73976	73.2099	37.42
2017-01-14 07:00:00	71.0133	-3.42926	65.0042	49.5316
2017-01-14 07:30:00	89.904	-1.08082	66.3398	46.4386
2017-01-14 08:00:00	75.3567	4.047	70.1299	54.998
2017-01-14 08:30:00	82.8134	1.94824	67.9352	49.1173
2017-01-14 09:00:00	71.5145	-15.3173	114.644	36.8394
2017-01-14 09:30:00	54.3047	6.67016	104.967	34.3274
2017-01-14 10:00:00	60.2393	2.58098	65.4255	35.2045
2017-01-14 10:30:00	62.079	-3.24306	43.1969	36.3144
2017-01-14 11:00:00	63.2473	-0.156645	68.0884	24.5856
2017-01-14 11:30:00	76.3444	0.203923	48.2551	22.7865
2017-01-14 12:00:00	64.7045	-1.02675	40.6982	25.5326
2017-01-14 12:30:00	46.1995	-5.12495	35.0159	27.9167
2017-01-14 13:00:00	60.229	0.205534	86.3542	34.3506
2017-01-14 13:30:00	54.4616	6.05668	30.4145	33.9049
2017-01-14 14:00:00	55.5612	-26.5201	40.7457	29.5399
2017-01-14 14:30:00	49.0322	-4.15948	44.2099	28.2237
2017-01-14 15:00:00	65.5022	-14.2566	85.5831	36.265
2017-01-14 15:30:00	61.7055	-8.72272	24.4907	41.3517
2017-01-14 16:00:00	64.7251	-1.93122	7.3483	45.5355
2017-01-14 16:30:00	53.3181	-11.511	18.7039	43.9419
2017-01-14 17:00:00	54.1178	3.78342	38.1126	50.2298
2017-01-14 17:30:00	69.8971	-0.365754	34.842	58.7184
2017-01-14 18:00:00	69.2547	-1.52436	34.7583	54.1068
2017-01-14 18:30:00	66.5065	-0.424603	34.2997	51.4835
2017-01-14 19:00:00	58.9104	-2.63971	145.373	52.1317
2017-01-14 19:30:00	65.1177	2.62327	101.491	56.3849
2017-01-14 20:00:00	77.5619	3.1564	80.7627	56.3386
2017-01-14 20:30:00	70.0739	-1.59818	58.2225	65.3703
2017-01-14 21:00:00	88.3711	-17.7102	63.2899	59.385
2017-01-14 21:30:00	79.0704	-12.8037	77.4512	60.4679
2017-01-14 22:00:00	75.1746	9.01556	94.3751	71.8723
2017-01-14 22:30:00	78.8034	-8.24062	49.5178	78.158
2017-01-14 23:00:00	68.4415	5.08772	45.475	71.1768
2017-01-14 23:30:00	76.3038	-12.1764	53.3582	63.5164
2017-01-15	71.5963	3.63377	64.5008	58.4595
2017-01-15 00:30:00	74.0376	2.69749	59.5716	46.2186
2017-01-15 01:00:00	60.4007	5.98997	115.247	54.7992
2017-01-15 01:30:00	77.2454	-0.408308	144.557	56.9154
2017-01-15 02:00:00	69.3852	-5.23533	97.2763	49.4956
2017-01-15 02:30:00	61.2005	1.90278	65.5253	61.0385
2017-01-15 03:00:00	38.5621	-0.163247	65.3998	61.096
2017-01-15 03:30:00	47.3842	-9.71729	46.4426	72.4443
2017-01-15 04:00:00	75.0111	-1.52847	30.3235	75.3811
2017-01-15 04:30:00	88.8801	0.153534	29.9008	83.7268
2017-01-15 05:00:00	99.9198	-28.3665	50.3873	150.176
2017-01-15 05:30:00	98.7736	20.6923	48.5202	143.113
2017-01-15 06:00:00	76.482	26.023	63.6262	145.715
2017-01-15 06:30:00	78.791	22.1363	47.5932	152.339
2017-01-15 07:00:00	77.4427	25.1945	59.1828	122.322
2017-01-15 07:30:00	63.1591	14.7207	75.4029	106.005
2017-01-15 08:00:00	46.7498	17.3043	58.9688	98.7776
2017-01-15 08:30:00	62.0706	18.229	58.1572	97.8611
2017-01-15 09:00:00	66.0891	19.4542	58.3379	86.1858
2017-01-15 09:30:00	81.2942	8.65956	36.2743	100.839
2017-01-15 10:00:00	98.2852	-7.26506	28.9144	103.797
2017-01-15 10:30:00	89.4856	8.95707	35.5126	96.5337
2017-01-15 11:00:00	105.22	-3.06052	45.8535	99.2291
2017-01-15 11:30:00	95.0526	3.8099	55.7434	114.514
2017-01-15 12:00:00	89.7659	5.52856	43.3275	115.884
2017-01-15 12:30:00	78.8687	17.4203	48.955	103.932
2017-01-15 13:00:00	53.4985	25.652	25.5134	61.0127
2017-01-15 13:30:00	62.6657	38.8703	18.2546	72.0728
2017-01-15 14:00:00	54.6374	28.1515	23.3186	78.3549
2017-01-15 14:30:00	54.2705	7.56164	14.9541	-7617.99
2017-01-15 15:00:00	61.8223	1.99228	9.3197	33.9416
2017-01-15 15:30:00	55.718	6.89454	13.9848	26.9607
2017-01-15 16:00:00	55.5409	10.8429	19.5602	17.6828
2017-01-15 16:30:00	58.796	6.22801	16.9234	21.3258
2017-01-15 17:00:00	52.5792	4.78446	16.9373	22.3787
2017-01-15 17:30:00	50.731	2.87441	28.0845	18.6878
2017-01-15 18:00:00	37.1994	-10.7457	29.9262	25.3541
2017-01-15 18:30:00	54.7459	2.45274	43.4992	9.30607
2017-01-15 19:00:00	56.2303	-1.72401	45.3698	21.3795
2017-01-15 19:30:00	55.3074	-0.428459	51.0888	14.4446
2017-01-15 20:00:00	60.3043	4.00391	47.0568	0.639777
2017-01-15 20:30:00	50.262	-0.336217	104.817	-3.64994
2017-01-15 21:00:00	56.4799	-17.7347	113.633	0.143208
2017-01-15 21:30:00	58.264	3.2351	81.8769	35.989
2017-01-15 22:00:00	55.4619	-5.53617	56.2141	38.3164
2017-01-15 22:30:00	63.0349	7.26689	76.6091	20.9564
2017-01-15 23:00:00	66.7645	0.842757	68.1804	9.89949
2017-01-15 23:30:00	53.4659	-7.67527	66.7108	-2.49517
2017-01-16	69.2256	-6.63657	49.6518	-9.35297
2017-01-16 00:30:00	68.3613	-20.3738	30.3342	5.58767
2017-01-16 01:00:00	61.7892	15.065	53.2544	-1.45915
2017-01-16 01:30:00	69.9243	17.2527	32.963	-7.28948
2017-01-16 02:00:00	75.5369	-15.8663	70.2342	6.02081
2017-01-16 02:30:00	63.3587	-0.520247	78.9414	-0.732758
2017-01-16 03:00:00	63.1722	-4.98991	81.3657	16.3085
2017-01-16 03:30:00	65.3238	-49.2894	76.4591	8.54532
2017-01-16 04:00:00	54.0413	25.9452	92.2934	-3.27919
2017-01-16 04:30:00	56.3798	14.5717	81.9812	-2.39836
2017-01-16 05:00:00	48.7691	-14.0473	63.7674	0.657974
2017-01-16 05:30:00	52.2079	4.18491	42.8939	19.7409
2017-01-16 06:00:00	49.6699	-7.84163	20.1761	10.0487
2017-01-16 06:30:00	45.3516	-18.8157	19.0193	9.04932
2017-01-16 07:00:00	40.6487	-44.8425	11.5453	27.5471
2017-01-16 07:30:00	33.0449	18.1636	15.7454	62.4042
2017-01-16 08:00:00	24.3842	10.405	21.862	43.734
2017-01-16 08:30:00	15.2503	-31.2064	13.0063	49.1358
2017-01-16 09:00:00	22.0519	-119.915	10.9931	42.2971
2017-01-16 09:30:00	21.6001	7.03213	19.7471	37.2862
2017-01-16 10:00:00	24.068	-21.9512	23.5329	48.1975
2017-01-16 10:30:00	34.2394	-1.28635	30.6933	61.2336
2017-01-16 11:00:00	50.5518	1.80357	27.637	72.7187
2017-01-16 11:30:00	46.8448	-22.065	27.6853	61.2806
2017-01-16 12:00:00	59.1732	-0.308002	21.0122	50.0855
2017-01-16 12:30:00	62.0833	-4.72556	17.2985	51.391
2017-01-16 13:00:00	68.0098	-4.50074	16.5931	50.2028
2017-01-16 13:30:00	58.6226	0.596803	11.3174	48.1909
2017-01-16 14:00:00	63.381	3.90935	12.3089	49.6436
2017-01-16 14:30:00	55.2305	-0.331294	21.7739	47.6337
2017-01-16 15:00:00	67.133	2.02044	14.8159	57.2644
2017-01-16 15:30:00	57.4299	-3.62366	17.893	57.0196
2017-01-16 16:00:00	86.9419	-7.33997	11.2922	60.1371
2017-01-16 16:30:00	73.401	-4.52209	19.8566	67.443
2017-01-16 17:00:00	52.2765	-4.22675	26.8363	62.768
2017-01-16 17:30:00	70.9178	4.58231	25.3173	58.9285
2017-01-16 18:00:00	68.1621	0.241719	32.1507	81.0052
2017-01-16 18:30:00	30.0343	3.80782	34.7942	93.3005
2017-01-16 19:00:00	5.61482	32.8497	29.6229	168.5
2017-01-16 19:30:00	40.3709	50.4999	61.8542	139.127
2017-01-16 20:00:00	30.8794	58.7148	46.0098	121.554
2017-01-16 20:30:00	33.4326	94.4676	51.7393	106.642
2017-01-16 21:00:00	-49.4007	97.5252	107.392	95.2724
2017-01-16 21:30:00	35.3507	95.2019	144.006	121.582
2017-01-16 22:00:00	53.4813	102.638	121.093	133.722
2017-01-16 22:30:00	72.3575	110.281	78.9858	151.097
2017-01-16 23:00:00	47.9624	98.7342	69.8713	172.593
2017-01-16 23:30:00	57.6149	108.389	106.136	128.425
2017-01-17	8.73078	125.342	104.791	82.1927
2017-01-17 00:30:00	9.48088	116.041	115.808	149.603
2017-01-17 01:00:00	22.4186	110.732	106.159	-99999
2017-01-17 01:30:00	42.5236	131.178	124.706	-99999
2017-01-17 02:00:00	61.3498	92.4759	147.012	-99999
2017-01-17 02:30:00	84.9217	94.2905	108.916	87.6312
2017-01-17 03:00:00	73.537	81.8507	125.336	92.4386
2017-01-17 03:30:00	45.0475	76.7408	112.524	134.348
2017-01-17 04:00:00	26.1413	85.079	118.343	144.28
2017-01-17 04:30:00	51.5727	88.7421	95.6648	103.538
2017-01-17 05:00:00	73.0669	105.265	103.157	80.4175
2017-01-17 05:30:00	35.2358	95.6114	92.8043	97.3713
2017-01-17 06:00:00	34.9223	81.3774	80.4082	122.536
2017-01-17 06:30:00	39.1406	70.4916	85.7812	114.156
2017-01-17 07:00:00	56.6775	70.0017	96.4924	112.473
2017-01-17 07:30:00	104.743	73.5092	92.4728	104.798
2017-01-17 08:00:00	115.707	59.2128	95.3834	89.6577
2017-01-17 08:30:00	93.5769	46.6762	108.246	89.7831
2017-01-17 09:00:00	64.2905	42.9501	103.692	91.98
2017-01-17 09:30:00	30.9438	54.0226	81.0971	95.7949
2017-01-17 10:00:00	33.6773	58.2255	110.959	110.609
2017-01-17 10:30:00	0.799992	50.2068	86.619	128.597
2017-01-17 11:00:00	4.7387	55.0971	98.2216	114.565
2017-01-17 11:30:00	14.8125	67.923	72.0097	84.758
2017-01-17 12:00:00	3.92234	58.8723	67.0947	47.9138
2017-01-17 12:30:00	28.7946	48.3132	65.3416	47.3522
2017-01-17 13:00:00	21.4687	39.5163	39.584	85.4956
2017-01-17 13:30:00	4.89279	10.9282	16.5339	143.565
2017-01-17 14:00:00	6.9009	44.0034	23.9377	142.893
2017-01-17 14:30:00	13.8448	45.5807	25.5071	122.257
2017-01-17 15:00:00	69.3326	67.3079	33.5411	92.0907
2017-01-17 15:30:00	81.0468	73.3279	21.9418	74.5166
2017-01-17 16:00:00	59.7205	39.8375	63.8481	54.139
2017-01-17 16:30:00	88.1819	24.1792	74.1262	45.1612
2017-01-17 17:00:00	101.744	34.5207	71.5156	79.5556
2017-01-17 17:30:00	92.8484	68.7652	73.8263	85.8226
2017-01-17 18:00:00	99.9583	74.1702	82.2348	103.588
2017-01-17 18:30:00	95.337	56.5245	82.5805	119.906
2017-01-17 19:00:00	96.0847	36.8824	70.5188	110.415
2017-01-17 19:30:00	39.4551	25.1028	88.3496	115.098
2017-01-17 20:00:00	36.9443	40.7596	64.727	119.297
2017-01-17 20:30:00	26.9683	36.8081	65.9819	113.068
2017-01-17 21:00:00	13.0651	37.3771	39.9047	122.243
2017-01-17 21:30:00	-8.98566	44.6575	60.5666	122.304
2017-01-17 22:00:00	23.0695	52.1385	53.6459	117.932
2017-01-17 22:30:00	25.5665	26.8954	47.4492	141.903
2017-01-17 23:00:00	-3.73912	28.303	48.4992	130.24
2017-01-17 23:30:00	-19.4	30.906	57.5045	115.366
2017-01-18	-14.4166	43.1186	68.5493	123.983
2017-01-18 00:30:00	-8.46413	52.7835	59.247	107.069
2017-01-18 01:00:00	-2.63691	49.0307	55.7571	97.2789
2017-01-18 01:30:00	8.43694	16.0706	60.0984	143.545
2017-01-18 02:00:00	1.27727	23.1189	68.633	113.691
2017-01-18 02:30:00	-34.9779	21.5413	70.298	108.257
2017-01-18 03:00:00	-0.530998	31.6995	80.9739	113.981
2017-01-18 03:30:00	-22.602	28.9257	81.4138	116.926
2017-01-18 04:00:00	-4.31802	13.987	78.6369	97.0024
2017-01-18 04:30:00	1.91478	69.2259	77.1714	74.3062
2017-01-18 05:00:00	40.2875	45.5247	79.6648	86.627
2017-01-18 05:30:00	61.0681	46.7319	77.6479	111.846
2017-01-18 06:00:00	37.6107	28.1288	80.7028	110.879
2017-01-18 06:30:00	14.0681	39.8249	69.8686	109.458
2017-01-18 07:00:00	48.7677	33.4525	47.9551	132.042
2017-01-18 07:30:00	28.4728	11.5232	73.183	123.6
2017-01-18 08:00:00	0.736844	7.00643	66.1748	100.798
2017-01-18 08:30:00	19.9552	8.47527	64.376	108.479
2017-01-18 09:00:00	2.17391	19.4975	35.4875	92.6096
2017-01-18 09:30:00	51.7056	45.903	58.7669	70.8459
2017-01-18 10:00:00	65.3811	53.3748	37.8694	35.18
2017-01-18 10:30:00	59.4615	26.5667	30.6489	59.3738
2017-01-18 11:00:00	17.9454	28.3152	56.7242	57.8587
2017-01-18 11:30:00	62.3532	34.2093	7.20861	72.4522
2017-01-18 12:00:00	56.1971	40.4978	11.7856	49.9149
2017-01-18 12:30:00	23.0881	33.6946	-18.5539	64.255
2017-01-18 13:00:00	1.32678	20.4469	-29.4501	56.0633
2017-01-18 13:30:00	-0.651585	19.53	-6.69465	16.8307
2017-01-18 14:00:00	12.163	5.3163	-0.0783651	-17.8445
2017-01-18 14:30:00	15.9726	-5.23978	10.6102	-20.838
2017-01-18 15:00:00	2.59513	27.242	9.9171	-21.6373
2017-01-18 15:30:00	22.9396	16.9944	36.9646	-31.0384
2017-01-18 16:00:00	38.0771	26.4147	14.5666	-13.2333
2017-01-18 16:30:00	36.077	30.7833	56.4198	13.0241
2017-01-18 17:00:00	33.5418	-1.83332	44.0033	30.8119
2017-01-18 17:30:00	52.9126	26.8446	62.2964	44.8386
2017-01-18 18:00:00	7.67599	27.9602	55.4922	97.5519
2017-01-18 18:30:00	14.3347	61.6016	56.9573	95.8385
2017-01-18 19:00:00	101.275	56.7917	67.5981	104.62
2017-01-18 19:30:00	83.1326	38.2123	79.599	103.384
2017-01-18 20:00:00	51.3528	13.267	64.7122	103.87
2017-01-18 20:30:00	49.8858	-2.98411	69.8637	95.9985
2017-01-18 21:00:00	47.5734	15.2964	97.741	92.7119
2017-01-18 21:30:00	14.3486	77.4973	61.7284	98.5604
2017-01-18 22:00:00	16.3725	89.9369	61.2942	79.206
2017-01-18 22:30:00	87.86	61.2272	49.7745	81.5448
2017-01-18 23:00:00	91.7521	25.9838	53.0083	54.7508
2017-01-18 23:30:00	90.935	41.5819	36.5362	65.1294
2017-01-19	100.553	58.69	3.30588	74.8432
2017-01-19 00:30:00	90.5359	72.9555	-11.4231	19.3835
2017-01-19 01:00:00	84.7753	42.3687	-7.44057	14.5725
2017-01-19 01:30:00	37.5084	36.2276	25.6236	44.8611
2017-01-19 02:00:00	26.0182	22.4345	26.7387	24.9757
2017-01-19 02:30:00	13.0157	23.7532	17.229	52.289
2017-01-19 03:00:00	7.30508	29.5629	21.5902	26.5196
2017-01-19 03:30:00	5.56856	47.5061	33.8878	26.3584
2017-01-19 04:00:00	7.88224	40.098	32.3545	25.3522
2017-01-19 04:30:00	2.12116	28.8701	20.5422	26.6056
2017-01-19 05:00:00	6.55703	34.4125	8.13438	17.334
2017-01-19 05:30:00	15.3435	13.0621	13.5244	28.9435
2017-01-19 06:00:00	7.4933	18.6572	-8.08669	35.4401
2017-01-19 06:30:00	1.66363	17.4219	-14.5029	62.2159
2017-01-19 07:00:00	-6.97614	0.168023	10.3781	60.7392
2017-01-19 07:30:00	9.19801	18.8932	14.5646	37.7256
2017-01-19 08:00:00	15.6785	1.31144	17.1983	47.0221
2017-01-19 08:30:00	24.3088	1.75569	16.1441	45.8857
2017-01-19 09:00:00	12.6471	4.17025	13.1921	55.4461
2017-01-19 09:30:00	23.8262	8.0302	20.8751	51.7895
2017-01-19 10:00:00	10.7577	13.1371	19.7153	55.1557
2017-01-19 10:30:00	11.2604	28.363	3.27082	59.3926
2017-01-19 11:00:00	30.2536	28.8842	1.89433	38.7519
2017-01-19 11:30:00	46.8296	29.0229	9.51029	30.164
2017-01-19 12:00:00	19.5737	33.4386	-2.43072	23.7463
2017-01-19 12:30:00	26.2564	31.8673	0.705579	24.3173
2017-01-19 13:00:00	32.1251	50.4302	-8.12362	13.1281
2017-01-19 13:30:00	29.0882	41.664	-10.6808	15.425
2017-01-19 14:00:00	28.0827	47.2357	3.99679	8.05948
2017-01-19 14:30:00	-8.59525	26.1763	11.8582	12.3483
2017-01-19 15:00:00	-23.6829	22.765	18.5865	9.21956
2017-01-19 15:30:00	-3.02987	22.9307	20.394	5.26676
2017-01-19 16:00:00	-7.76249	60.6563	9.0672	-60.5952
2017-01-19 16:30:00	13.4363	46.8278	-5.3827	-16.7833
2017-01-19 17:00:00	31.5944	29.3184	26.8248	-24.6355
2017-01-19 17:30:00	61.9424	32.2229	47.9098	11.5568
2017-01-19 18:00:00	72.3316	35.4333	57.8006	33.1279
2017-01-19 18:30:00	78.669	57.1115	43.6821	48.9497
2017-01-19 19:00:00	103.564	75.683	77.7274	55.0263
2017-01-19 19:30:00	89.9686	48.2748	74.3213	58.311
2017-01-19 20:00:00	59.9448	49.6518	81.6483	61.2546
2017-01-19 20:30:00	29.6681	30.0554	71.0903	54.3717
2017-01-19 21:00:00	53.2654	42.6625	64.5214	57.2844
2017-01-19 21:30:00	55.8132	24.0925	68.2774	51.0115
2017-01-19 22:00:00	23.8837	29.369	69.9381	42.6816
2017-01-19 22:30:00	14.5539	28.3006	63.8513	47.6327
2017-01-19 23:00:00	41.3814	15.8735	72.3866	60.6508
2017-01-19 23:30:00	73.3781	11.8575	63.4334	51.1462
2017-01-20	55.4546	14.244	72.5659	51.6355
2017-01-20 00:30:00	23.3719	17.4149	59.1921	41.2574
2017-01-20 01:00:00	19.6227	3.73069	54.2938	40.2745
2017-01-20 01:30:00	-2.093	14.3499	55.9073	40.249
2017-01-20 02:00:00	-7.9207	15.1262	63.3467	45.5457
2017-01-20 02:30:00	44.2449	24.8857	51.7711	40.4522
2017-01-20 03:00:00	41.6986	0.11514	48.2044	32.0506
2017-01-20 03:30:00	75.5772	12.2362	44.926	43.78
2017-01-20 04:00:00	57.9648	0.709383	32.3456	44.81
2017-01-20 04:30:00	45.8612	12.2451	51.4694	41.8732
2017-01-20 05:00:00	38.4193	3.00553	60.5072	49.8421
2017-01-20 05:30:00	39.3319	-5.6232	57.3022	60.4684
2017-01-20 06:00:00	49.1899	2.70885	57.184	64.9299
2017-01-20 06:30:00	55.1961	-4.91272	57.2196	59.7828
2017-01-20 07:00:00	59.2665	-1.11318	52.1976	46.9807
2017-01-20 07:30:00	58.1294	9.77055	31.697	40.9747
2017-01-20 08:00:00	54.4469	-4.11076	36.8934	49.1143
2017-01-20 08:30:00	45.6239	0.514025	22.5257	42.4933
2017-01-20 09:00:00	37.9318	-0.182518	24.2055	37.2507
2017-01-20 09:30:00	35.0405	1.15492	16.6592	42.182
2017-01-20 10:00:00	34.2623	0.866728	10.1664	29.1862
2017-01-20 10:30:00	35.3945	-0.358191	-1.9204	29.4246
2017-01-20 11:00:00	-99999	-6.91306	-15.7865	-4.45753
2017-01-20 11:30:00	-99999	-10.6882	-32.6518	-25.7399
2017-01-20 12:00:00	-4.44658	-24.9529	-42.4265	-39.6952
2017-01-20 12:30:00	-14.2524	-26.102	-36.4025	-55.7606
2017-01-20 13:00:00	-27.1849	-45.3452	-43.6538	-65.162
2017-01-20 13:30:00	-31.7444	-32.5603	-49.2038	-73.9998
2017-01-20 14:00:00	-40.9471	-45.616	-35.2663	-75.8043
2017-01-20 14:30:00	-49.2983	-13.2164	-39.6448	-70.7156
2017-01-20 15:00:00	-32.7735	-20.7672	-2.51616	-79.0636
2017-01-20 15:30:00	-28.0532	-15.7876	-10.3173	-54.7182
2017-01-20 16:00:00	-25.1572	-14.2794	-11.9308	-40.2985
2017-01-20 16:30:00	-13.0456	-6.5477	-6.70497	-20.0573
2017-01-20 17:00:00	-3.36851	0.493981	3.91689	-0.519485
2017-01-20 17:30:00	6.87731	3.71414	-6.53657	4.19019
2017-01-20 18:00:00	-10.8523	5.08597	-0.199307	5.87814
2017-01-20 18:30:00	12.7129	11.5194	-1.55394	3.10101
2017-01-20 19:00:00	-1.19194	-0.923655	3.93994	7.96796
2017-01-20 19:30:00	-2.55083	2.95634	-0.325667	1.7912
2017-01-20 20:00:00	1.30648	-2.73107	1.52402	4.59092
2017-01-20 20:30:00	-18.9003	2.22108	1.17271	5.93793
2017-01-20 21:00:00	-0.249632	1.80806	11.2011	2.30541
2017-01-20 21:30:00	7.96254	-0.698604	0.281773	1.49885
2017-01-20 22:00:00	2.30365	-2.64357	11.6273	5.3591
2017-01-20 22:30:00	11.678	1.47423	14.9201	-3.28645
2017-01-20 23:00:00	14.9268	1.24295	17.3215	3.97978
2017-01-20 23:30:00	7.05087	1.96488	2.00741	3.74355
2017-01-21	4.41228	1.25946	8.18852	3.74477
2017-01-21 00:30:00	12.7764	-1.3887	0.599727	5.05916
2017-01-21 01:00:00	6.2646	-0.81956	0.699703	-0.626981
2017-01-21 01:30:00	20.2294	-0.62201	-4.77916	6.85715
2017-01-21 02:00:00	28.2959	-1.27347	-21.0064	9.99333
2017-01-21 02:30:00	32.5172	2.19166	-1.07118	13.652
2017-01-21 03:00:00	38.3276	-3.75039	-10.9263	7.39391
2017-01-21 03:30:00	28.5446	-1.56619	-0.487428	-0.0727438
2017-01-21 04:00:00	35.1436	-2.89768	-9.4812	0.943226
2017-01-21 04:30:00	34.4415	-0.690025	-2.40323	-2.77271
2017-01-21 05:00:00	35.0725	6.04905	-3.40859	0.769262
2017-01-21 05:30:00	16.7649	3.3254	-1.40053	3.58327
2017-01-21 06:00:00	20.9086	12.7165	2.87358	0.719112
2017-01-21 06:30:00	17.5846	14.8383	7.20352	-3.06035
2017-01-21 07:00:00	18.2468	21.9499	6.30855	6.62854
2017-01-21 07:30:00	20.224	31.2268	9.96679	12.0453
2017-01-21 08:00:00	19.0455	28.9433	5.07741	18.3446
2017-01-21 08:30:00	25.9416	27.4159	2.76568	12.7232
2017-01-21 09:00:00	23.1686	41.0026	-3.32318	8.04724
2017-01-21 09:30:00	26.3608	20.5163	3.77422	5.43685
2017-01-21 10:00:00	25.1994	21.823	-14.2102	9.48899
2017-01-21 10:30:00	29.9345	18.6424	-9.40308	-1.00495
2017-01-21 11:00:00	10.1285	3.33186	-21.3388	-4.49742
2017-01-21 11:30:00	5.45673	-10.714	-30.8242	-23.4392
2017-01-21 12:00:00	-13.8893	-14.7269	0.740361	-37.0047
2017-01-21 12:30:00	-33.7316	-30.4772	-25.1066	-39.0265
2017-01-21 13:00:00	-43.218	-39.1392	-24.5422	-50.4769
2017-01-21 13:30:00	-66.2875	-42.5575	-14.1121	-79.5676
2017-01-21 14:00:00	-61.4265	-42.3664	-29.795	-101.418
2017-01-21 14:30:00	-63.78	-47.28	-180.515	-85.7008
2017-01-21 15:00:00	-94.2603	-53.4433	-99999	-38.8609
2017-01-21 15:30:00	-93.7136	-44.4237	-99999	-12.9954
2017-01-21 16:00:00	-21.9898	-34.5827	-99999	-41.1754
2017-01-21 16:30:00	-16.654	-24.34	-99999	-16.4241
2017-01-21 17:00:00	1.65483	-1.90456	-99999	-1.66394
2017-01-21 17:30:00	8.68674	2.62571	-99999	2.16143
2017-01-21 18:00:00	21.3817	10.5808	-99999	0.700161
2017-01-21 18:30:00	17.4462	4.48085	-99999	-0.142389
2017-01-21 19:00:00	22.9246	-2.69994	-99999	7.34571
2017-01-21 19:30:00	13.3268	0.231709	-99999	14.3494
2017-01-21 20:00:00	8.66521	-4.51706	-99999	19.2119
2017-01-21 20:30:00	18.906	-2.28532	-99999	17.1326
2017-01-21 21:00:00	11.1211	-1.91348	-99999	36.46
2017-01-21 21:30:00	8.40685	-1.67553	-99999	33.796
2017-01-21 22:00:00	3.82278	-2.63177	-99999	23.7954
2017-01-21 22:30:00	0.44165	-5.83188	-99999	21.7553
2017-01-21 23:00:00	-1.81757	-10.9506	-99999	20.0374
2017-01-21 23:30:00	-0.692835	-5.19013	-99999	21.0724
2017-01-22	-0.882645	-6.83485	-99999	17.6856
2017-01-22 00:30:00	2.40122	-6.33004	-99999	23.6913
2017-01-22 01:00:00	-3.00868	-7.98711	-99999	9.74771
2017-01-22 01:30:00	4.78618	-8.56972	-99999	-1.02304
2017-01-22 02:00:00	-3.40249	-8.02216	-99999	4.40943
2017-01-22 02:30:00	-3.67547	-3.62789	-99999	-0.433388
2017-01-22 03:00:00	-1.96308	-4.07788	-99999	1.4986
2017-01-22 03:30:00	-4.7319	-2.63191	-99999	-3.66485
2017-01-22 04:00:00	-6.82538	-4.24507	-99999	-2.42845
2017-01-22 04:30:00	-1.39574	-6.35598	-99999	-3.15164
2017-01-22 05:00:00	-3.25006	-8.27612	-99999	-0.815574
2017-01-22 05:30:00	-2.98286	-4.27535	-99999	-0.753655
2017-01-22 06:00:00	-4.81355	-2.60312	-99999	-1.36599
2017-01-22 06:30:00	-1.53622	-10.2025	-99999	-1.38093
2017-01-22 07:00:00	-2.46448	-5.77589	-99999	-2.17495
2017-01-22 07:30:00	-3.14259	-3.24326	-99999	-2.22976
2017-01-22 08:00:00	-3.00261	-6.29935	-99999	-1.60687
2017-01-22 08:30:00	-3.11317	-5.02392	-99999	-0.96975
2017-01-22 09:00:00	0.377742	-8.15145	-99999	-1.07344
2017-01-22 09:30:00	-3.53422	-7.78025	-99999	-0.0397748
2017-01-22 10:00:00	-99999	-5.84516	-99999	-2.79522
2017-01-22 10:30:00	-99999	-3.93903	-99999	-4.28139
2017-01-22 11:00:00	-99999	-6.98456	-99999	-5.14154
2017-01-22 11:30:00	-99999	-6.90984	-99999	-6.16601
2017-01-22 12:00:00	-99999	-13.1213	-99999	-9.54071
2017-01-22 12:30:00	-99999	-15.1194	-99999	-10.4411
2017-01-22 13:00:00	-99999	-11.5747	-99999	-11.4122
2017-01-22 13:30:00	-99999	-13.3757	-99999	-12.1201
2017-01-22 14:00:00	-99999	-10.1496	-99999	-12.5028
2017-01-22 14:30:00	-99999	-21.366	-99999	-12.9358
2017-01-22 15:00:00	-99999	-18.6936	-99999	-8.90051
2017-01-22 15:30:00	-99999	-9.57805	-99999	-11.0428
2017-01-22 16:00:00	-99999	-10.6574	-99999	-13.3119
2017-01-22 16:30:00	-99999	-11.8688	-99999	-13.2724
2017-01-22 17:00:00	-99999	-7.77774	-99999	-10.7828
2017-01-22 17:30:00	-99999	-5.11049	-99999	-5.00089
2017-01-22 18:00:00	-99999	-7.18984	-99999	-2.06312
2017-01-22 18:30:00	-99999	-4.01391	-99999	-3.1848
2017-01-22 19:00:00	-99999	0.640246	-99999	-4.94057
2017-01-22 19:30:00	-99999	-2.37856	-99999	-2.20102
2017-01-22 20:00:00	-99999	-3.37771	-99999	-4.72249
2017-01-22 20:30:00	-99999	-4.26264	-99999	-4.86115
2017-01-22 21:00:00	-99999	-99999	-99999	-15.5003
2017-01-22 21:30:00	-99999	-3.57667	-99999	-5.45587
2017-01-22 22:00:00	-99999	-99999	-99999	-9.35797
2017-01-22 22:30:00	-99999	-99999	-99999	-11.8983
2017-01-22 23:00:00	-99999	-99999	-99999	-6.742
2017-01-22 23:30:00	-99999	-99999	-99999	-8.20151
2017-01-23	-99999	-99999	-99999	-3.76734
2017-01-23 00:30:00	-99999	-99999	-99999	-4.16495
2017-01-23 01:00:00	-99999	-99999	-99999	-2.19759
2017-01-23 01:30:00	-99999	-99999	-99999	-3.25345
2017-01-23 02:00:00	-99999	-99999	-99999	-0.671723
2017-01-23 02:30:00	-99999	-99999	-99999	-1.66463
2017-01-23 03:00:00	-99999	-99999	-99999	-3.8987
2017-01-23 03:30:00	-99999	-99999	-99999	-4.3991
2017-01-23 04:00:00	-99999	-99999	-99999	-4.63269
2017-01-23 04:30:00	-99999	-99999	-99999	-3.45361
2017-01-23 05:00:00	-99999	-99999	-99999	-6.5841
2017-01-23 05:30:00	-99999	-99999	-99999	-6.60819
2017-01-23 06:00:00	-99999	-99999	-99999	-7.04501
2017-01-23 06:30:00	-99999	-99999	-99999	-7.50804
2017-01-23 07:00:00	-99999	-99999	-99999	-2.61234
2017-01-23 07:30:00	-99999	-99999	-99999	-8.91806
2017-01-23 08:00:00	-99999	-99999	-99999	-1.68073
2017-01-23 08:30:00	-99999	-99999	-99999	-4.80972
2017-01-23 09:00:00	-99999	-99999	-99999	-5.57378
2017-01-23 09:30:00	-99999	-99999	-99999	-5.66657
2017-01-23 10:00:00	-99999	-99999	-99999	-2.35289
2017-01-23 10:30:00	-99999	-99999	-99999	-4.3099
2017-01-23 11:00:00	-99999	-99999	-99999	-7.41775
2017-01-23 11:30:00	-99999	-99999	-99999	-7.79114
2017-01-23 12:00:00	-99999	-99999	-99999	-13.3753
2017-01-23 12:30:00	-99999	-99999	-99999	-17.4648
2017-01-23 13:00:00	-99999	-99999	-99999	-14.8789
2017-01-23 13:30:00	-99999	-99999	-99999	-14.4518
2017-01-23 14:00:00	-99999	-99999	-99999	-39.6891
2017-01-23 14:30:00	-99999	-99999	-99999	-47.0587
2017-01-23 15:00:00	-99999	-99999	-99999	-41.5962
2017-01-23 15:30:00	-99999	-99999	-99999	-45.7893
2017-01-23 16:00:00	-99999	-99999	-99999	-24.247
2017-01-23 16:30:00	-99999	-99999	-99999	-24.6268
2017-01-23 17:00:00	-99999	-99999	-99999	-4.76231
2017-01-23 17:30:00	-99999	-99999	-99999	4.64384
2017-01-23 18:00:00	-99999	-99999	-99999	4.23749
2017-01-23 18:30:00	-99999	-99999	-99999	3.01845
2017-01-23 19:00:00	-99999	-99999	-99999	10.4983
2017-01-23 19:30:00	-99999	-99999	-99999	10.6094
2017-01-23 20:00:00	-99999	-99999	-99999	9.15843
2017-01-23 20:30:00	-99999	-99999	-99999	12.0903
2017-01-23 21:00:00	-99999	-99999	-99999	10.9129
2017-01-23 21:30:00	-99999	-99999	-99999	5.2213
2017-01-23 22:00:00	-99999	-99999	-99999	7.72646
2017-01-23 22:30:00	-99999	-99999	-99999	5.23614
2017-01-23 23:00:00	-99999	-99999	-99999	3.61694
2017-01-23 23:30:00	-99999	-99999	-99999	2.03716
2017-01-24	-99999	-99999	-99999	-3.43549
2017-01-24 00:30:00	-99999	-99999	-99999	0.182157
2017-01-24 01:00:00	-99999	-99999	-99999	0.365975
2017-01-24 01:30:00	-99999	-99999	-99999	0.194095
2017-01-24 02:00:00	-99999	-99999	-99999	1.21663
2017-01-24 02:30:00	-99999	-99999	-99999	1.86293
2017-01-24 03:00:00	-99999	-99999	-99999	1.1597
2017-01-24 03:30:00	-99999	-99999	-99999	0.832157
2017-01-24 04:00:00	-99999	-99999	-99999	0.455373
2017-01-24 04:30:00	-99999	-99999	-99999	-2.03416
2017-01-24 05:00:00	-99999	-99999	-99999	0.46257
2017-01-24 05:30:00	-99999	-99999	-99999	0.245601
2017-01-24 06:00:00	-99999	-99999	-99999	-0.0620246
2017-01-24 06:30:00	-99999	-99999	-99999	0.4267
2017-01-24 07:00:00	-99999	-99999	-99999	1.09822
2017-01-24 07:30:00	-99999	-99999	-99999	0.00186556
2017-01-24 08:00:00	-99999	-99999	-99999	-0.399917
2017-01-24 08:30:00	-99999	-99999	-99999	1.91084
2017-01-24 09:00:00	-99999	-99999	-99999	1.14272
2017-01-24 09:30:00	-99999	-99999	-99999	4.34603
2017-01-24 10:00:00	-99999	-99999	-99999	-1.11411
2017-01-24 10:30:00	-99999	-99999	-99999	3.11463
2017-01-24 11:00:00	-99999	-99999	-99999	-15.9078
2017-01-24 11:30:00	-99999	-99999	-99999	-40.8729
2017-01-24 12:00:00	-99999	-99999	-99999	-40.3626
2017-01-24 12:30:00	-99999	-99999	-99999	-54.4675
2017-01-24 13:00:00	-99999	-99999	-99999	-59.5654
2017-01-24 13:30:00	-99999	-99999	-99999	-71.5362
2017-01-24 14:00:00	-99999	-99999	-99999	-99999
2017-01-24 14:30:00	-99999	-99999	-99999	-99999
2017-01-24 15:00:00	-25.1778	-99999	-99999	-99999
2017-01-24 15:30:00	-18.5569	-99999	-99999	-99999
2017-01-24 16:00:00	-22.7014	-99999	-99999	-99999
2017-01-24 16:30:00	-8.06019	-99999	-99999	-99999
2017-01-24 17:00:00	-4.73532	-99999	-99999	-99999
2017-01-24 17:30:00	0.282329	-99999	-99999	-99999
2017-01-24 18:00:00	-2.40031	-99999	-99999	-99999
2017-01-24 18:30:00	7.09443	-99999	-99999	-99999
2017-01-24 19:00:00	6.45436	-99999	-99999	-99999
2017-01-24 19:30:00	0.0501701	-99999	-99999	-99999
2017-01-24 20:00:00	1.15984	-99999	-99999	-99999
2017-01-24 20:30:00	3.67974	-99999	-99999	-99999
2017-01-24 21:00:00	3.43142	-99999	-99999	-99999
2017-01-24 21:30:00	4.37033	-99999	-99999	-99999
2017-01-24 22:00:00	4.18891	-99999	-99999	-99999
2017-01-24 22:30:00	13.6567	-99999	-99999	-99999
2017-01-24 23:00:00	12.6487	-99999	-99999	-99999
2017-01-24 23:30:00	14.5918	-99999	-99999	-99999
2017-01-25	13.0017	-99999	-99999	-99999
2017-01-25 00:30:00	-0.949269	-99999	-99999	4.56641
2017-01-25 01:00:00	8.98197	-99999	-99999	6.63228
2017-01-25 01:30:00	10.5684	-99999	-99999	3.30725
2017-01-25 02:00:00	9.38239	-99999	-99999	6.67185
2017-01-25 02:30:00	10.0442	-99999	-99999	4.86369
2017-01-25 03:00:00	18.8809	-99999	-99999	3.1981
2017-01-25 03:30:00	23.0174	-99999	-99999	6.87463
2017-01-25 04:00:00	24.1411	-99999	-99999	4.873
2017-01-25 04:30:00	19.765	-99999	-99999	2.26453
2017-01-25 05:00:00	22.4398	-99999	25.4793	1.86063
2017-01-25 05:30:00	18.4466	-99999	-2.80417	5.34811
2017-01-25 06:00:00	38.4347	-99999	2.26363	-0.991973
2017-01-25 06:30:00	35.4879	-99999	14.9946	-1.68386
2017-01-25 07:00:00	32.0889	-99999	2.78265	1.41338
2017-01-25 07:30:00	39.6208	-99999	1.58028	-5.16937
2017-01-25 08:00:00	43.7287	-99999	-5.50939	12.4309
2017-01-25 08:30:00	41.1378	-99999	4.25229	7.75324
2017-01-25 09:00:00	38.5849	-99999	8.78681	3.78964
2017-01-25 09:30:00	40.8709	-99999	14.5244	8.58101
2017-01-25 10:00:00	41.0493	-99999	11.6327	8.29159
2017-01-25 10:30:00	35.9222	-99999	15.9612	-4.0437
2017-01-25 11:00:00	8.60654	-99999	-0.415404	-4.53892
2017-01-25 11:30:00	-4.03192	-99999	2.43547	-35.7933
2017-01-25 12:00:00	-26.6659	-99999	80.682	-51.4409
2017-01-25 12:30:00	-33.7585	-99999	91.1266	-50.1626
2017-01-25 13:00:00	-56.223	-99999	-15.2894	-79.7147
2017-01-25 13:30:00	-65.7814	-99999	-30.4287	-98.7629
2017-01-25 14:00:00	-70.8971	-99999	-13.4205	-93.7355
2017-01-25 14:30:00	-64.0167	-36.7126	-0.564158	-84.2663
2017-01-25 15:00:00	-79.8939	-35.2782	-28.6119	-84.0717
2017-01-25 15:30:00	-78.7412	-33.9574	0.157742	-67.2433
2017-01-25 16:00:00	-53.902	-25.9917	-9.05536	-67.9848
2017-01-25 16:30:00	-36.9591	-16.759	-3.39486	-66.6513
2017-01-25 17:00:00	-10.7028	-7.01884	1.0099	-15.8549
2017-01-25 17:30:00	4.12516	0.162012	2.36786	-1.56632
2017-01-25 18:00:00	15.4845	1.3477	4.08478	-2.65817
2017-01-25 18:30:00	9.36147	-0.507092	-14.3573	1.43373
2017-01-25 19:00:00	26.3884	2.19744	1.16373	12.2162
2017-01-25 19:30:00	42.2537	1.71674	0.854467	16.9093
2017-01-25 20:00:00	50.4188	0.204083	6.38185	14.8418
2017-01-25 20:30:00	42.7106	0.578072	3.41546	19.1934
2017-01-25 21:00:00	40.3593	2.86949	16.9343	8.32974
2017-01-25 21:30:00	39.9631	0.866167	14.8151	10.0819
2017-01-25 22:00:00	44.6496	0.72573	3.2419	5.64165
2017-01-25 22:30:00	50.6237	2.50816	22.4406	7.41333
2017-01-25 23:00:00	54.7752	1.77356	11.6356	3.87417
2017-01-25 23:30:00	52.2287	1.13674	20.4131	1.309
2017-01-26	52.1781	1.20065	26.4969	5.08709
2017-01-26 00:30:00	61.1358	0.46111	26.8891	4.42725
2017-01-26 01:00:00	54.7672	0.122246	94.136	-2.77481
2017-01-26 01:30:00	47.1185	-1.02641	69.7343	0.303238
2017-01-26 02:00:00	51.273	-0.845824	81.3636	2.35788
2017-01-26 02:30:00	51.5673	-4.25855	67.0841	4.0795
2017-01-26 03:00:00	51.1803	26.4252	65.3167	9.40522
2017-01-26 03:30:00	52.6442	36.5816	59.4039	4.34685
2017-01-26 04:00:00	43.361	21.1861	56.4842	5.96915
2017-01-26 04:30:00	43.3344	24.1861	52.4996	17.7172
2017-01-26 05:00:00	34.2557	33.796	39.9898	14.2346
2017-01-26 05:30:00	45.4459	29.987	27.9291	8.60888
2017-01-26 06:00:00	40.7049	34.3816	42.887	2.12858
2017-01-26 06:30:00	49.7951	44.8363	30.9808	9.97516
2017-01-26 07:00:00	49.5164	31.2775	31.7918	4.03813
2017-01-26 07:30:00	40.7796	30.5552	31.0812	10.0439
2017-01-26 08:00:00	47.3467	35.044	27.7632	16.1351
2017-01-26 08:30:00	46.5099	35.8311	25.4871	12.3095
2017-01-26 09:00:00	46.0325	27.0112	29.9393	14.5636
2017-01-26 09:30:00	31.0628	22.3609	27.9593	7.37883
2017-01-26 10:00:00	33.4252	31.6897	23.355	12.341
2017-01-26 10:30:00	21.3198	17.2817	2.12548	11.8859
2017-01-26 11:00:00	12.6313	9.99979	15.0394	4.57561
2017-01-26 11:30:00	-11.3806	-4.6374	10.674	-13.7973
2017-01-26 12:00:00	-24.446	-17.3103	-12.038	-44.6538
2017-01-26 12:30:00	-44.7108	-21.2311	-0.386665	-82.0826
2017-01-26 13:00:00	-53.9466	-26.4033	10.8714	-86.3904
2017-01-26 13:30:00	-59.5851	-37.1292	13.3444	-92.467
2017-01-26 14:00:00	-67.5817	-38.9539	7.31554	-91.8651
2017-01-26 14:30:00	-64.8091	-34.3805	8.28757	-89.0641
2017-01-26 15:00:00	-69.2036	-38.0133	-0.753573	-85.5219
2017-01-26 15:30:00	-51.2457	-26.9621	12.6343	-70.1959
2017-01-26 16:00:00	-48.9953	-27.0699	7.43537	-48.1668
2017-01-26 16:30:00	-26.7094	-12.6632	-3.31455	-32.5943
2017-01-26 17:00:00	-5.33589	-1.4382	28.1252	-17.9982
2017-01-26 17:30:00	2.74965	4.04908	2.57695	4.7159
2017-01-26 18:00:00	3.71821	1.24074	34.7336	26.5466
2017-01-26 18:30:00	3.43159	1.90322	43.3915	28.016
2017-01-26 19:00:00	7.70561	0.167937	27.2624	37.5219
2017-01-26 19:30:00	3.31265	20.0309	19.5686	33.9861
2017-01-26 20:00:00	-12.1801	8.32678	35.9102	35.5843
2017-01-26 20:30:00	6.10297	12.3021	26.1501	38.3664
2017-01-26 21:00:00	-28.7055	14.6393	31.4869	46.8242
2017-01-26 21:30:00	19.7958	-4.808	37.8546	53.6111
2017-01-26 22:00:00	10.9735	-5.18606	29.644	46.5243
2017-01-26 22:30:00	15.2052	-1.69693	57.5825	36.6181
2017-01-26 23:00:00	22.2597	9.31491	36.009	49.3358
2017-01-26 23:30:00	22.1256	-6.75917	31.3401	43.5832
2017-01-27	17.9629	-2.44047	20.7987	45.7249
2017-01-27 00:30:00	74.9844	-0.25003	43.1393	46.8051
2017-01-27 01:00:00	81.739	1.00199	43.5551	49.3695
2017-01-27 01:30:00	72.961	32.2254	52.3662	54.2522
2017-01-27 02:00:00	73.5072	28.6583	142.386	54.7529
2017-01-27 02:30:00	77.8028	33.6686	133.193	45.2793
2017-01-27 03:00:00	62.7809	39.0649	50.2835	27.8383
2017-01-27 03:30:00	64.9952	25.6239	57.902	26.6669
2017-01-27 04:00:00	60.6515	18.2236	52.9862	34.6523
2017-01-27 04:30:00	66.8612	12.4227	53.1196	44.492
2017-01-27 05:00:00	68.961	-18.8576	34.3621	23.3435
2017-01-27 05:30:00	54.4675	-0.647003	32.2193	61.6613
2017-01-27 06:00:00	53.1147	10.4398	35.8925	38.2927
2017-01-27 06:30:00	47.3733	4.26109	27.8392	50.2937
2017-01-27 07:00:00	62.4141	4.76494	33.7209	40.6293
2017-01-27 07:30:00	52.7902	-6.30453	34.7518	30.562
2017-01-27 08:00:00	50.4029	-4.10176	19.7802	36.3868
2017-01-27 08:30:00	52.2426	0.108885	30.9917	49.4862
2017-01-27 09:00:00	50.7546	5.12377	35.6332	56.8677
2017-01-27 09:30:00	43.6881	-13.0657	53.1389	43.314
2017-01-27 10:00:00	27.0382	15.4477	49.7724	23.3589
2017-01-27 10:30:00	14.1432	18.2689	24.704	17.1736
2017-01-27 11:00:00	9.90674	-11.7348	4.1833	-25.3341
2017-01-27 11:30:00	-11.4112	-18.6749	-9.22174	-24.0934
2017-01-27 12:00:00	1.34415	-8.73841	-37.5935	-52.8243
2017-01-27 12:30:00	-12.5755	-20.6197	-4.23217	-55.8676
2017-01-27 13:00:00	-31.0125	-18.2052	-19.7119	-49.3984
2017-01-27 13:30:00	-30.479	-9.70956	-17.4702	-87.2008
2017-01-27 14:00:00	-35.8737	-6.71648	-9.299	-43.2137
2017-01-27 14:30:00	-12.5466	-7.86346	-54.0441	-113.02
2017-01-27 15:00:00	11.3277	-9.70363	-16.2137	-85.4662
2017-01-27 15:30:00	13.5197	-36.869	-7.59716	-82.9557
2017-01-27 16:00:00	9.31614	-15.2596	2.3204	-41.6196
2017-01-27 16:30:00	28.7559	-2.60991	28.6123	-15.3788
2017-01-27 17:00:00	43.886	0.172358	36.3391	24.0242
2017-01-27 17:30:00	48.3909	-0.502478	42.0681	28.9761
2017-01-27 18:00:00	60.4723	-3.46017	44.0363	29.9297
2017-01-27 18:30:00	60.0899	2.72694	46.1066	53.989
2017-01-27 19:00:00	56.6478	-13.7014	50.0392	27.8067
2017-01-27 19:30:00	53.1912	-9.92431	56.4656	46.0512
2017-01-27 20:00:00	63.6457	-4.45554	58.4417	42.5521
2017-01-27 20:30:00	61.3589	24.0503	66.5013	52.6524
2017-01-27 21:00:00	60.2522	22.5902	74.7471	60.9063
2017-01-27 21:30:00	52.0377	13.0566	72.6056	55.5242
2017-01-27 22:00:00	58.8308	22.9265	78.5223	56.3602
2017-01-27 22:30:00	55.6004	29.6433	69.8176	63.9904
2017-01-27 23:00:00	67.0389	25.7449	66.597	38.3035
2017-01-27 23:30:00	72.9399	23.0212	64.088	-12.3106
2017-01-28	76.1519	25.4344	68.4897	62.618
2017-01-28 00:30:00	69.9371	27.9823	70.0665	58.3169
2017-01-28 01:00:00	56.7145	5.39114	67.6631	39.6341
2017-01-28 01:30:00	55.5874	6.68986	73.6583	51.8739
2017-01-28 02:00:00	69.6486	-3.35577	86.751	56.5862
2017-01-28 02:30:00	66.0704	-4.28106	75.1823	56.7048
2017-01-28 03:00:00	62.4554	-7.32905	68.8087	50.0733
2017-01-28 03:30:00	78.2358	1.04691	63.6521	52.4635
2017-01-28 04:00:00	71.6918	-5.42314	77.4149	70.7268
2017-01-28 04:30:00	75.417	-17.8523	78.398	68.2234
2017-01-28 05:00:00	73.7203	-2.16733	78.5455	76.677
2017-01-28 05:30:00	79.0255	-0.978337	77.5987	65.4773
2017-01-28 06:00:00	53.2344	-28.2088	74.2937	53.347
2017-01-28 06:30:00	62.2133	-3.2669	67.2151	45.5892
2017-01-28 07:00:00	71.0504	-27.7499	67.7503	29.0119
2017-01-28 07:30:00	61.2224	-35.6705	77.5221	68.4044
2017-01-28 08:00:00	69.841	-18.4733	81.4656	31.0045
2017-01-28 08:30:00	66.3226	-8.12281	65.9586	45.5082
2017-01-28 09:00:00	63.4357	-12.8206	60.5703	58.0427
2017-01-28 09:30:00	78.9939	13.4317	68.179	61.0598
2017-01-28 10:00:00	63.9464	-21.7548	52.3651	51.4221
2017-01-28 10:30:00	45.1546	-26.084	23.9909	9.12801
2017-01-28 11:00:00	49.9395	10.7443	19.6977	30.5509
2017-01-28 11:30:00	11.6808	-13.478	-5.143	3.87486
2017-01-28 12:00:00	30.9514	-7.57897	22.8986	-5.70172
2017-01-28 12:30:00	18.8554	15.8659	27.4101	-34.7648
2017-01-28 13:00:00	7.03861	15.9607	15.5249	-43.209
2017-01-28 13:30:00	13.7597	29.542	4.76012	-60.8796
2017-01-28 14:00:00	48.3364	19.472	40.6434	-82.9183
2017-01-28 14:30:00	48.875	16.592	61.8053	-5.03846
2017-01-28 15:00:00	48.1046	12.987	48.0165	-68.0813
2017-01-28 15:30:00	57.1365	-33.3641	65.5337	-8.78828
2017-01-28 16:00:00	54.9033	45.2711	93.3842	26.9281
2017-01-28 16:30:00	62.5503	38.8521	85.7593	39.8352
2017-01-28 17:00:00	53.0456	44.4643	70.5164	49.1206
2017-01-28 17:30:00	69.0269	39.2412	79.0083	58.9414
2017-01-28 18:00:00	65.2954	38.3372	86.834	66.3751
2017-01-28 18:30:00	55.944	32.7434	92.9406	60.1407
2017-01-28 19:00:00	63.2328	33.877	92.2533	52.4812
2017-01-28 19:30:00	67.9267	43.9139	102.603	55.1512
2017-01-28 20:00:00	57.7088	52.9978	124.166	48.6166
2017-01-28 20:30:00	45.157	22.4744	112.384	56.7916
2017-01-28 21:00:00	52.629	19.9256	111.228	55.8158
2017-01-28 21:30:00	65.2285	17.3581	118.742	54.7088
2017-01-28 22:00:00	75.6602	11.2937	104.908	60.624
2017-01-28 22:30:00	60.4101	2.27376	91.9087	66.4406
2017-01-28 23:00:00	57.2432	-15.3194	92.3496	64.1769
2017-01-28 23:30:00	63.0881	-20.6521	86.7478	71.6691
2017-01-29	52.8027	-11.5858	71.9791	66.6944
2017-01-29 00:30:00	51.6912	1.83875	80.1398	67.4321
2017-01-29 01:00:00	63.2182	-31.9903	67.6548	68.9575
2017-01-29 01:30:00	48.7346	-39.6874	73.8918	72.4536
2017-01-29 02:00:00	27.0153	11.2533	76.6018	84.6165
2017-01-29 02:30:00	31.2458	8.35312	70.656	93.3265
2017-01-29 03:00:00	40.7542	4.58199	58.4674	81.3181
2017-01-29 03:30:00	38.9578	-13.5036	59.0408	76.9874
2017-01-29 04:00:00	43.7721	19.0643	66.1088	81.2729
2017-01-29 04:30:00	38.4905	19.5268	81.0095	60.3349
2017-01-29 05:00:00	45.0775	-16.3834	81.2501	85.5267
2017-01-29 05:30:00	35.4339	13.089	79.917	66.0137
2017-01-29 06:00:00	25.2085	16.8038	78.3712	73.6088
2017-01-29 06:30:00	28.4978	33.0655	76.886	67.139
2017-01-29 07:00:00	44.5102	41.2676	82.8805	68.2579
2017-01-29 07:30:00	25.2899	36.1108	92.1128	68.3078
2017-01-29 08:00:00	22.5033	31.4337	66.0764	59.3129
2017-01-29 08:30:00	43.8612	16.8214	74.99	55.6691
2017-01-29 09:00:00	68.244	8.40832	79.1521	61.2985
2017-01-29 09:30:00	84.8856	-4.65855	80.8032	54.2678
2017-01-29 10:00:00	61.9035	16.0056	75.7562	51.4395
2017-01-29 10:30:00	54.9986	5.39631	72.9151	47.089
2017-01-29 11:00:00	57.4124	9.83429	73.4659	40.9015
2017-01-29 11:30:00	28.7402	13.8905	58.5893	-21.2607
2017-01-29 12:00:00	23.4508	6.74	35.596	-82.2817
2017-01-29 12:30:00	-3.78629	7.90754	37.0406	-84.3342
2017-01-29 13:00:00	-10.5431	-11.8387	27.1273	-86.481
2017-01-29 13:30:00	-16.3432	-20.167	-6.68287	-73.7715
2017-01-29 14:00:00	-41.6116	-8.16953	-27.3844	-85.9175
2017-01-29 14:30:00	-28.7404	-48.9702	2.55852	-98.3446
2017-01-29 15:00:00	-17.441	-39.5487	33.9409	-114.386
2017-01-29 15:30:00	23.2912	-15.8187	62.9025	-95.0794
2017-01-29 16:00:00	-10.0609	33.4026	47.6887	-57.2363
2017-01-29 16:30:00	-30.5006	30.6367	38.2458	-35.8581
2017-01-29 17:00:00	-7.86154	16.1361	31.1433	10.0764
2017-01-29 17:30:00	40.0849	20.2053	58.1139	30.4603
2017-01-29 18:00:00	83.5062	47.248	97.383	75.9889
2017-01-29 18:30:00	85.2014	34.4283	91.6573	89.8945
2017-01-29 19:00:00	62.3029	29.9558	84.9296	60.1876
2017-01-29 19:30:00	76.158	47.0034	89.2652	40.1656
2017-01-29 20:00:00	64.7787	56.0456	100.966	73.3139
2017-01-29 20:30:00	61.2599	84.5795	115.86	98.6519
2017-01-29 21:00:00	55.9174	63.2956	115.734	88.7797
2017-01-29 21:30:00	60.0415	61.3754	128.562	80.577
2017-01-29 22:00:00	58.8504	38.8643	103.676	91.5667
2017-01-29 22:30:00	49.0574	24.0372	106.969	86.2584
2017-01-29 23:00:00	65.1923	18.2957	113.074	90.6438
2017-01-29 23:30:00	65.7242	28.8339	67.3629	88.283
2017-01-30	63.704	28.2615	73.0609	86.9853
2017-01-30 00:30:00	84.1031	25.2765	61.0404	91.9928
2017-01-30 01:00:00	72.5348	39.2079	65.174	71.1158
2017-01-30 01:30:00	71.6703	43.8727	69.6458	79.9794
2017-01-30 02:00:00	62.4751	50.2797	70.1638	87.5654
2017-01-30 02:30:00	61.3715	47.671	68.8785	86.3693
2017-01-30 03:00:00	53.1324	42.7439	107.496	82.1091
2017-01-30 03:30:00	67.137	31.0013	-7.50005	80.5471
2017-01-30 04:00:00	51.0853	11.7871	-123.46	86.2096
2017-01-30 04:30:00	26.9884	29.2215	1.3493	82.7516
2017-01-30 05:00:00	14.5147	24.34	-11.2319	73.5431
2017-01-30 05:30:00	3.85778	29.137	-6.95712	72.0791
2017-01-30 06:00:00	4.82614	23.6066	26.3717	72.5911
2017-01-30 06:30:00	10.8116	14.6079	32.5614	83.9988
2017-01-30 07:00:00	16.6648	16.1802	-37.6575	76.7507
2017-01-30 07:30:00	7.99704	47.4004	-31.8951	79.7001
2017-01-30 08:00:00	-99999	24.7177	6.18613	70.6219
2017-01-30 08:30:00	-99999	32.2462	25.1245	26.4831
2017-01-30 09:00:00	43.6327	60.4225	19.7136	9.98116
2017-01-30 09:30:00	75.4262	13.4385	15.88	15.7069
2017-01-30 10:00:00	47.8621	9.97787	20.9206	22.663
2017-01-30 10:30:00	36.254	17.1726	-10.9715	-4.04499
2017-01-30 11:00:00	27.5543	16.5959	-39.9686	-15.7277
2017-01-30 11:30:00	-1.48825	1.93498	-47.1532	-37.5792
2017-01-30 12:00:00	-17.7134	12.0907	-24.1652	-60.9784
2017-01-30 12:30:00	-45.8217	8.64738	-35.4778	-72.7026
2017-01-30 13:00:00	-87.1508	7.36251	-52.462	-110.279
2017-01-30 13:30:00	-94.5755	15.3533	-83.5511	-129.457
2017-01-30 14:00:00	-67.421	9.78438	-76.4798	-150.143
2017-01-30 14:30:00	-49.0252	9.62945	-86.0499	-45.605
2017-01-30 15:00:00	-34.5424	7.34151	-64.1543	-94.1686
2017-01-30 15:30:00	-77.5861	6.42153	-22.3319	-123.179
2017-01-30 16:00:00	-21.6702	13.6619	-77.6784	-45.4902
2017-01-30 16:30:00	-3.77608	16.1061	9.14328	-34.9017
2017-01-30 17:00:00	6.52153	34.313	9.24992	7.23625
2017-01-30 17:30:00	8.71993	54.9557	-2.80327	25.0063
2017-01-30 18:00:00	17.0259	53.0597	6.20726	11.0426
2017-01-30 18:30:00	26.4032	47.7813	-7.8913	6.47598
2017-01-30 19:00:00	39.7838	53.8151	7.44758	10.1835
2017-01-30 19:30:00	33.7079	51.3602	-18.2732	13.5577
2017-01-30 20:00:00	40.3023	47.7711	-19.7895	13.3142
2017-01-30 20:30:00	26.8635	42.4137	6.16291	7.15894
2017-01-30 21:00:00	42.1434	32.4859	19.6843	6.37351
2017-01-30 21:30:00	35.8919	37.0758	3.66421	6.9566
2017-01-30 22:00:00	34.8552	29.4208	-17.3379	6.4138
2017-01-30 22:30:00	28.5777	25.4567	-3.9335	6.9176
2017-01-30 23:00:00	20.5412	22.8969	7.68444	12.7235
2017-01-30 23:30:00	14.5126	40.9166	-1.57244	12.7625
2017-01-31	25.4258	49.1081	11.7105	9.50126
2017-01-31 00:30:00	25.879	62.4039	-1.60762	9.27244
2017-01-31 01:00:00	14.1027	52.2278	12.0963	9.988
2017-01-31 01:30:00	9.38247	47.6631	13.5056	3.70517
2017-01-31 02:00:00	13.3752	52.305	15.1524	8.87021
2017-01-31 02:30:00	27.8669	42.3677	16.7932	4.26026
2017-01-31 03:00:00	21.3185	53.0308	5.51591	8.01042
2017-01-31 03:30:00	31.3203	43.3941	13.8558	13.3232
2017-01-31 04:00:00	35.3286	32.6667	12.8639	9.66103
2017-01-31 04:30:00	44.097	40.3835	10.6884	6.88535
2017-01-31 05:00:00	50.1876	40.4258	-14.1022	0.794403
2017-01-31 05:30:00	52.1007	40.0644	-10.3121	0.484836
2017-01-31 06:00:00	52.3581	39.0357	16.6397	3.95921
2017-01-31 06:30:00	34.9943	40.0144	-21.4361	1.2493
2017-01-31 07:00:00	30.5582	25.7723	9.34119	6.44486
2017-01-31 07:30:00	29.0463	19.3052	13.2989	6.59711
2017-01-31 08:00:00	33.7494	8.49418	32.0216	8.05028
2017-01-31 08:30:00	29.2752	5.31613	23.7326	4.53082
2017-01-31 09:00:00	41.3538	1.14925	11.8481	9.53872
2017-01-31 09:30:00	38.4575	2.63136	2.0623	8.05354
2017-01-31 10:00:00	32.3138	-4.95861	-8.90916	2.57459
2017-01-31 10:30:00	8.9729	0.869516	-18.5055	0.737294
2017-01-31 11:00:00	-29.9013	4.98664	-24.8415	4.41266
2017-01-31 11:30:00	-35.5088	1.3793	-39.8445	-15.8218
2017-01-31 12:00:00	-47.3361	-8.48861	-44.3887	-34.6337
2017-01-31 12:30:00	-54.7128	-12.0235	-59.6961	-102.5
2017-01-31 13:00:00	-28.2778	-7.29972	-22.9848	-58.3293
2017-01-31 13:30:00	-24.702	-21.2136	-17.1622	-103.206
2017-01-31 14:00:00	-38.5504	-30.0493	-50.3861	-109.752
2017-01-31 14:30:00	-40.1448	-21.9659	-26.2747	-48.162
2017-01-31 15:00:00	-46.7125	-27.4505	-18.5015	-88.7248
2017-01-31 15:30:00	-29.2217	-18.5279	4.19058	-131.935
2017-01-31 16:00:00	-34.2497	-6.47898	-45.5257	-118.231
2017-01-31 16:30:00	-35.3799	-2.22883	-14.9622	-141.485
2017-01-31 17:00:00	-22.8449	7.60298	-18.2031	-102.289
2017-01-31 17:30:00	-7.98936	17.5885	-1.18797	-66.7241
2017-01-31 18:00:00	4.91403	21.94	22.9956	-29.7154
2017-01-31 18:30:00	12.2935	20.1703	9.5711	5.823
2017-01-31 19:00:00	14.8999	16.2666	82.044	10.5289
2017-01-31 19:30:00	16.7595	5.45991	-4.75842	10.659
2017-01-31 20:00:00	13.8864	3.30168	11.4552	11.8294
2017-01-31 20:30:00	6.76949	4.31617	31.2343	12.7178
2017-01-31 21:00:00	1.34284	4.59953	9.74201	6.20548
2017-01-31 21:30:00	1.23549	3.28174	9.11235	2.64646
2017-01-31 22:00:00	13.5552	7.9583	3.59496	1.53217
2017-01-31 22:30:00	20.922	8.2916	5.82728	-0.458703
2017-01-31 23:00:00	7.16255	8.15433	7.41386	1.9151
2017-01-31 23:30:00	4.29922	5.04095	10.5152	3.18681
2017-02-01	5.08299	1.27832	6.53827	4.18923
2017-02-01 00:30:00	8.20229	0.436088	5.52362	1.33608
2017-02-01 01:00:00	12.3771	1.83013	12.559	0.976619
2017-02-01 01:30:00	9.56863	1.45311	-0.682046	0.826597
2017-02-01 02:00:00	8.37722	0.929106	-4.67181	2.81522
2017-02-01 02:30:00	0.149616	3.81602	2	1.31135
2017-02-01 03:00:00	0.445416	5.37941	0.296951	3.27819
2017-02-01 03:30:00	-0.914774	2.44076	0.769181	1.41778
2017-02-01 04:00:00	-2.98038	5.38223	2.31452	11.6004
2017-02-01 04:30:00	-1.65862	7.15784	3.57888	17.9252
2017-02-01 05:00:00	1.83647	7.30843	-1.08336	3.40621
2017-02-01 05:30:00	11.1676	8.7007	2.23646	11.1935
2017-02-01 06:00:00	7.52361	10.5039	2.53184	15.2865
2017-02-01 06:30:00	4.89339	9.08185	4.04814	22.2934
2017-02-01 07:00:00	6.58629	7.19181	2.70195	8.88499
2017-02-01 07:30:00	6.53255	10.997	4.19985	8.12228
2017-02-01 08:00:00	8.64465	7.37291	1.87738	5.17953
2017-02-01 08:30:00	17.0272	4.39238	3.93151	3.4578
2017-02-01 09:00:00	12.2769	2.30194	7.10112	4.89339
2017-02-01 09:30:00	9.43123	2.71753	2.42236	6.0925
2017-02-01 10:00:00	7.03878	2.07105	-5.64649	5.67242
2017-02-01 10:30:00	0.525139	3.12342	-17.6144	1.51734
2017-02-01 11:00:00	-1.80391	0.101946	-21.7524	-54.3673
2017-02-01 11:30:00	-7.69563	0.668186	-17.9185	-32.9912
2017-02-01 12:00:00	-11.6122	1.90394	-9.59505	-38.3096
2017-02-01 12:30:00	-21.6955	-0.968903	-9.71332	-64.7104
2017-02-01 13:00:00	-22.549	-7.31748	-10.8718	-52.8554
2017-02-01 13:30:00	-30.5294	-14.276	-16.8231	-80.6669
2017-02-01 14:00:00	-23.3812	-2.26087	-13.0694	-63.8453
2017-02-01 14:30:00	-23.3186	0.389052	-21.9585	-42.4481
2017-02-01 15:00:00	-34.7109	-1.99847	-14.4282	-64.1156
2017-02-01 15:30:00	-21.4297	-7.29122	-5.99878	-66.9781
2017-02-01 16:00:00	-19.2661	-2.13087	10.0457	-43.0883
2017-02-01 16:30:00	-14.334	-4.42924	1.30479	-24.7449
2017-02-01 17:00:00	13.4525	-11.511	7.90323	-18.2003
2017-02-01 17:30:00	5.25079	16.4783	-59.5771	-4.7316
2017-02-01 18:00:00	18.821	8.96453	2.82096	2.99736
2017-02-01 18:30:00	27.8473	13.5044	1.74269	5.12509
2017-02-01 19:00:00	18.6263	2.77491	4.74509	-5.84143
2017-02-01 19:30:00	10.9139	2.26554	28.1124	11.9194
2017-02-01 20:00:00	2.78763	1.84659	6.85528	8.70635
2017-02-01 20:30:00	4.04989	0.256658	11.283	12.307
2017-02-01 21:00:00	1.68289	0.887994	30.1598	19.4363
2017-02-01 21:30:00	-0.903843	1.16925	9.02523	5.03556
2017-02-01 22:00:00	1.28801	2.6935	3.10136	0.649167
2017-02-01 22:30:00	3.29251	3.63561	0.476425	1.06228
2017-02-01 23:00:00	0.83681	1.90366	15.4143	5.05121
2017-02-01 23:30:00	1.82535	3.92134	-13.273	8.82643
2017-02-02	3.17699	2.05989	42.098	4.71243
2017-02-02 00:30:00	3.1003	3.37469	38.2237	2.40927
2017-02-02 01:00:00	4.29547	3.81358	28.4255	-5.48193
2017-02-02 01:30:00	2.48279	3.83151	22.3169	-4.33666
2017-02-02 02:00:00	4.83326	4.96087	17.074	8.59725
2017-02-02 02:30:00	4.34118	4.47839	9.20805	0.710767
2017-02-02 03:00:00	5.13113	4.85335	8.51112	1.84663
2017-02-02 03:30:00	3.05115	2.82002	7.74461	0.229622
2017-02-02 04:00:00	4.92651	4.09368	8.75529	5.15194
2017-02-02 04:30:00	7.04901	5.09016	2.26521	4.01918
2017-02-02 05:00:00	4.33906	2.84829	11.2198	3.21437
2017-02-02 05:30:00	4.27164	0.449965	7.94803	1.25715
2017-02-02 06:00:00	4.79118	2.99518	8.90255	0.549584
2017-02-02 06:30:00	5.69262	5.12371	7.91504	2.19978
2017-02-02 07:00:00	4.71949	5.32905	8.25352	2.52949
2017-02-02 07:30:00	14.1377	11.1904	6.06031	2.50644
2017-02-02 08:00:00	17.3482	7.5393	9.06509	3.0486
2017-02-02 08:30:00	7.67095	5.61546	6.00457	5.58615
2017-02-02 09:00:00	5.62019	18.3814	11.4996	8.23604
2017-02-02 09:30:00	7.17048	19.82	10.4324	4.68537
2017-02-02 10:00:00	3.60562	16.9197	3.10984	2.29843
2017-02-02 10:30:00	10.4531	10.4519	-14.277	-8.12245
2017-02-02 11:00:00	8.1818	6.99777	-34.9837	-19.4628
2017-02-02 11:30:00	-5.65125	2.85011	-35.9388	-26.8511
2017-02-02 12:00:00	-4.44065	-3.70231	-56.2002	-23.6924
2017-02-02 12:30:00	-3.1604	-6.96373	-62.8226	-29.4963
2017-02-02 13:00:00	-13.9194	-13.0756	-48.0037	-78.6961
2017-02-02 13:30:00	-20.9558	-9.60278	-80.7683	-102.818
2017-02-02 14:00:00	-14.2327	-9.61211	-67.831	-115.562
2017-02-02 14:30:00	-25.1158	-11.5563	-82.3512	-127.021
2017-02-02 15:00:00	-17.609	-9.55678	-66.8156	-129.392
2017-02-02 15:30:00	-10.2655	-7.20055	-51.528	-110.013
2017-02-02 16:00:00	-4.01761	-3.41625	-44.2038	-97.5192
2017-02-02 16:30:00	-2.27501	-0.67687	-23.3758	-79.613
2017-02-02 17:00:00	6.26953	-0.457702	-1.46155	-48.5604
2017-02-02 17:30:00	10.3086	-7.0966	4.23006	-15.2267
2017-02-02 18:00:00	22.9814	-0.476181	5.91999	0.176213
2017-02-02 18:30:00	17.6957	-0.000327874	5.9818	16.8131
2017-02-02 19:00:00	0.642563	-2.10855	2.04121	28.1363
2017-02-02 19:30:00	8.49913	0.376045	-0.68122	20.7705
2017-02-02 20:00:00	5.28099	-2.72003	3.2776	29.9438
2017-02-02 20:30:00	5.06458	0.202695	2.69737	32.5021
2017-02-02 21:00:00	10.3446	-1.2003	8.4371	23.5859
2017-02-02 21:30:00	34.8874	-6.50819	29.0904	13.1137
2017-02-02 22:00:00	22.5959	4.2954	4.79142	-6.80034
2017-02-02 22:30:00	15.6733	3.02152	26.9749	21.6091
2017-02-02 23:00:00	15.475	-5.6349	12.8903	3.16424
2017-02-02 23:30:00	4.44271	0.0291128	26.4655	10.9437
2017-02-03	7.57555	8.47472	15.7585	20.6576
2017-02-03 00:30:00	1.65184	5.431	-16.5612	11.209
2017-02-03 01:00:00	-2.46263	1.68402	12.6561	15.6076
2017-02-03 01:30:00	-4.29494	2.11574	10.1897	11.422
2017-02-03 02:00:00	-3.71302	2.73961	-12.7041	3.92735
2017-02-03 02:30:00	1.35268	3.06251	4.9189	1.67562
2017-02-03 03:00:00	-5.45307	0.268956	23.8989	-2.19635
2017-02-03 03:30:00	12.2383	0.809851	0.368588	12.8234
2017-02-03 04:00:00	23.2345	3.38976	5.6812	-2.57852
2017-02-03 04:30:00	39.3165	1.82562	9.3202	36.8717
2017-02-03 05:00:00	44.2787	29.9155	4.22745	14.1394
2017-02-03 05:30:00	24.4517	7.16543	-1.53891	-1.01223
2017-02-03 06:00:00	31.3215	18.5607	1.07438	-4.86218
2017-02-03 06:30:00	39.1185	17.9804	-2.64816	9.83097
2017-02-03 07:00:00	25.3377	14.7787	3.23188	9.93163
2017-02-03 07:30:00	30.5717	14.4225	-10.0484	9.3832
2017-02-03 08:00:00	24.2107	20.237	5.2506	6.48303
2017-02-03 08:30:00	25.4908	11.188	-1.69525	8.36937
2017-02-03 09:00:00	16.9901	13.0159	8.83005	4.12649
2017-02-03 09:30:00	24.3694	10.1809	-0.584135	6.7949
2017-02-03 10:00:00	19.0933	6.37483	-25.3497	-4.26889
2017-02-03 10:30:00	-9.00072	6.22262	-20.9373	-14.8926
2017-02-03 11:00:00	-10.7738	-10.6874	-2.96988	-26.6433
2017-02-03 11:30:00	-16.6763	17.3859	-19.7112	-33.4592
2017-02-03 12:00:00	-39.0478	-24.4695	-40.7727	-56.0668
2017-02-03 12:30:00	-69.1882	-12.0422	-52.0092	-57.3556
2017-02-03 13:00:00	-45.3955	-28.7845	-46.7345	-61.2312
2017-02-03 13:30:00	-48.279	-29.0558	-42.2226	-68.7257
2017-02-03 14:00:00	-37.9087	-25.1261	-43.4367	-69.8177
2017-02-03 14:30:00	-43.1944	-20.2754	-39.4429	-63.792
2017-02-03 15:00:00	-28.028	-13.6304	-33.7767	-62.2792
2017-02-03 15:30:00	-24.5245	-8.18343	-26.5582	-46.3519
2017-02-03 16:00:00	-21.543	-7.67775	-19.0482	-45.0646
2017-02-03 16:30:00	-18.0562	-10.9412	-7.77397	-28.0219
2017-02-03 17:00:00	-13.7224	-19.5537	-6.62469	-22.3186
2017-02-03 17:30:00	-13.745	-12.1884	-0.709726	-12.3351
2017-02-03 18:00:00	-9.52587	-6.32048	-3.30851	-8.06197
2017-02-03 18:30:00	-8.41355	-1.6402	-7.87182	-1.7244
2017-02-03 19:00:00	-5.20847	-0.261614	-3.57435	-2.30878
2017-02-03 19:30:00	-6.289	-0.334219	-0.650762	-1.26039
2017-02-03 20:00:00	-5.2204	-2.54458	-2.02146	0.434764
2017-02-03 20:30:00	-4.49181	-2.09839	2.19595	-1.35529
2017-02-03 21:00:00	-1.91982	-1.28519	-3.04493	1.29741
2017-02-03 21:30:00	-2.22439	-2.10376	-3.11137	2.8363
2017-02-03 22:00:00	-0.571439	-1.42183	-1.44464	4.07375
2017-02-03 22:30:00	0.932206	1.55717	-1.68017	4.89488
2017-02-03 23:00:00	0.044347	1.13158	-0.964799	3.13565
2017-02-03 23:30:00	-0.79188	1.55227	-1.70786	3.48272
2017-02-04	0.35333	1.10014	-1.18085	4.12441
2017-02-04 00:30:00	-0.41988	0.248672	-0.868996	6.67401
2017-02-04 01:00:00	-1.1377	-0.246607	-0.531602	13.5475
2017-02-04 01:30:00	0.363369	-1.93057	-1.38087	16.5844
2017-02-04 02:00:00	-2.46703	-1.35116	2.19255	6.1452
2017-02-04 02:30:00	-1.93023	-1.63075	-2.07271	4.70226
2017-02-04 03:00:00	-1.3455	-0.28591	-2.1932	2.7925
2017-02-04 03:30:00	-0.868568	1.49568	-4.9763	-0.687159
2017-02-04 04:00:00	-1.44221	2.87827	-1.5567	0.56055
2017-02-04 04:30:00	-0.638126	5.36936	-3.00538	-0.372466
2017-02-04 05:00:00	0.441632	6.12345	1.10567	0.226456
2017-02-04 05:30:00	2.68346	1.64071	0.850352	1.06329
2017-02-04 06:00:00	6.34225	-0.855843	5.25991	2.53238
2017-02-04 06:30:00	1.1805	-0.777847	4.6587	1.80444
2017-02-04 07:00:00	-1.97919	-0.702905	1.9045	3.04959
2017-02-04 07:30:00	-2.66871	-1.31808	-0.298056	2.43058
2017-02-04 08:00:00	-0.248957	-0.652052	-0.767999	1.86889
2017-02-04 08:30:00	-0.48676	1.34219	-0.0832516	1.21539
2017-02-04 09:00:00	-0.862144	2.84833	0.266856	0.277285
2017-02-04 09:30:00	-0.393431	2.02836	0.601131	0.263134
2017-02-04 10:00:00	-2.11327	0.508623	0.570123	-2.37048
2017-02-04 10:30:00	-1.51777	-1.18972	2.49669	-3.10505
2017-02-04 11:00:00	-0.507838	-2.45143	-2.38605	-13.568
2017-02-04 11:30:00	-9.67554	-3.43508	-7.31537	-13.629
2017-02-04 12:00:00	-11.7636	-7.45995	0.574904	-22.9345
2017-02-04 12:30:00	-14.8697	-5.07928	-21.1055	-20.4998
2017-02-04 13:00:00	-15.2422	-13.4306	-7.88468	-22.9183
2017-02-04 13:30:00	-18.899	-10.7607	-26.4672	-32.4999
2017-02-04 14:00:00	-25.1073	-11.379	-17.9448	-27.9439
2017-02-04 14:30:00	-10.7782	-9.61299	-14.1113	-33.9693
2017-02-04 15:00:00	-10.9972	-7.79806	-17.49	-19.798
2017-02-04 15:30:00	-12.3476	-9.06049	-16.2208	-15.0167
2017-02-04 16:00:00	-6.73041	-9.05802	-11.5301	-11.3078
2017-02-04 16:30:00	0.851909	-6.89518	-6.5329	-17.2607
2017-02-04 17:00:00	1.96673	-8.76299	-4.94429	-14.9528
2017-02-04 17:30:00	4.65099	-4.61875	-3.69317	-6.12988
2017-02-04 18:00:00	3.60048	-0.921231	2.14212	-1.09676
2017-02-04 18:30:00	-0.227185	0.0433609	-1.48351	-1.93803
2017-02-04 19:00:00	3.28987	-0.707779	0.737357	-1.76009
2017-02-04 19:30:00	0.537039	-0.0915065	-0.168267	-0.50033
2017-02-04 20:00:00	-1.27978	-0.794685	1.0138	4.40098
2017-02-04 20:30:00	0.995046	-0.339125	0.922773	-0.350772
2017-02-04 21:00:00	-3.13482	-0.0558832	-0.013937	-0.889599
2017-02-04 21:30:00	-2.25567	1.91088	0.652305	0.661833
2017-02-04 22:00:00	-8.45471	2.93725	9.35044	-6.23688
2017-02-04 22:30:00	-6.07616	0.838474	-1.9351	0.601052
2017-02-04 23:00:00	1.37975	2.53476	-8.3683	2.29756
2017-02-04 23:30:00	0.757814	1.56111	-0.446608	-0.17961
2017-02-05	1.43897	0.0230806	0.0616951	-1.47576
2017-02-05 00:30:00	2.93429	0.511467	0.276031	-2.31675
2017-02-05 01:00:00	-0.0148859	0.334327	0.101959	3.05764
2017-02-05 01:30:00	-0.708852	-1.63916	1.38373	-0.86827
2017-02-05 02:00:00	-0.59627	-1.07096	-0.399068	-0.845401
2017-02-05 02:30:00	-0.712751	1.62237	-0.0450027	-1.32205
2017-02-05 03:00:00	2.22466	-1.26731	-0.0957338	-2.28288
2017-02-05 03:30:00	-99999	-0.312594	-15.5036	-1.12707
2017-02-05 04:00:00	-99999	-99999	-0.174348	-0.96927
2017-02-05 04:30:00	-99999	-99999	0.641998	-2.15307
2017-02-05 05:00:00	-99999	-99999	0.12206	-1.84793
2017-02-05 05:30:00	-99999	-99999	-0.716753	-1.67153
2017-02-05 06:00:00	-99999	-99999	0.00742959	-1.25863
2017-02-05 06:30:00	-99999	-99999	-0.311147	-1.4399
2017-02-05 07:00:00	-99999	-99999	-0.259578	0.758088
2017-02-05 07:30:00	-99999	-99999	0.462523	1.43227
2017-02-05 08:00:00	-99999	-99999	1.30801	0.079433
2017-02-05 08:30:00	-99999	-99999	4.09358	-0.087977
2017-02-05 09:00:00	-99999	-99999	1.25615	-0.415296
2017-02-05 09:30:00	-99999	-99999	-0.182643	-2.70561
2017-02-05 10:00:00	-99999	-99999	-1.61793	-1.64653
2017-02-05 10:30:00	-99999	-99999	0.456782	-1.04691
2017-02-05 11:00:00	-99999	-99999	-0.296127	-3.91632
2017-02-05 11:30:00	-99999	-99999	-2.81538	-3.41291
2017-02-05 12:00:00	-99999	-99999	-2.64932	-6.85223
2017-02-05 12:30:00	-99999	-99999	-5.95154	-9.39438
2017-02-05 13:00:00	-99999	-99999	-19.6317	407299
2017-02-05 13:30:00	-99999	-99999	1.37751	-9.65847
2017-02-05 14:00:00	-99999	-99999	0.16197	-6.36649
2017-02-05 14:30:00	-99999	-99999	-1.26919	-7.13754
2017-02-05 15:00:00	2.22139	-99999	-1.3591	-8.24118
2017-02-05 15:30:00	-6.92045	-99999	0.457456	-6.58681
2017-02-05 16:00:00	-10.4726	-46.1443	0.410743	-6.03445
2017-02-05 16:30:00	-7.33837	0.0141202	-0.427398	-5.5704
2017-02-05 17:00:00	-6.53916	11.5238	0.807686	-3.01875
2017-02-05 17:30:00	-3.45645	7.53608	0.378745	-2.38236
2017-02-05 18:00:00	-0.948262	7.74051	1.35905	-1.15775
2017-02-05 18:30:00	-0.485057	10.1504	0.251049	-0.544735
2017-02-05 19:00:00	-2.62319	8.92207	-27.9824	0.811826
2017-02-05 19:30:00	2.1252	5.85239	2.24869	0.415505
2017-02-05 20:00:00	-1.43668	4.98063	-7.86238	0.407512
2017-02-05 20:30:00	-0.150022	2.5239	-0.97998	0.789514
2017-02-05 21:00:00	-3.55998	1.63678	2.48805	0.22386
2017-02-05 21:30:00	-3.23993	1.89201	-0.957893	-0.520901
2017-02-05 22:00:00	-3.80513	0.582175	0.185088	0.254234
2017-02-05 22:30:00	-1.59079	-2.28233	-0.783217	0.656751
2017-02-05 23:00:00	-1.94357	-3.07913	5.78529	1.32612
2017-02-05 23:30:00	-2.08777	-1.80365	1.45095	-0.562937
2017-02-06	-0.380203	-2.72745	0.840255	0.334883
2017-02-06 00:30:00	-0.701153	-2.051	0.919641	1.30632
2017-02-06 01:00:00	-1.84709	-2.02836	-1.01791	0.440548
2017-02-06 01:30:00	-0.29636	-1.83455	1.48376	0.10835
2017-02-06 02:00:00	0.909066	-0.996847	-1.36514	0.53226
2017-02-06 02:30:00	-1.45835	-0.161209	-5.20325	0.50727
2017-02-06 03:00:00	-1.88016	-1.28452	-0.288902	0.751146
2017-02-06 03:30:00	-2.27478	-2.55702	5.8817	0.980931
2017-02-06 04:00:00	-1.65433	-3.09145	-3.92277	1.15066
2017-02-06 04:30:00	-1.50729	-1.93106	-1.86531	-0.578255
2017-02-06 05:00:00	-0.878599	-1.59399	-1.80802	3.69483
2017-02-06 05:30:00	-0.724839	-2.82532	-1.47603	3.62563
2017-02-06 06:00:00	-1.48765	-2.14649	-1.58118	-1.05808
2017-02-06 06:30:00	-0.654284	-1.88169	-1.67787	-0.243349
2017-02-06 07:00:00	-0.636571	-2.47996	-0.784021	-3.13118
2017-02-06 07:30:00	-0.737523	-0.259766	-0.417944	-0.379572
2017-02-06 08:00:00	-0.612675	-1.9687	-0.146484	-0.422458
2017-02-06 08:30:00	-1.22238	-1.6246	-0.477861	-2.02779
2017-02-06 09:00:00	-0.767738	-1.90608	0.34441	0.180297
2017-02-06 09:30:00	-0.402926	-1.72182	0.3752	0.845278
2017-02-06 10:00:00	-0.893193	-2.43443	-1.87205	-1.39092
2017-02-06 10:30:00	-1.0945	-2.12955	1.84677	0.250323
2017-02-06 11:00:00	-3.74313	-1.29768	-1.86156	-4.17699
2017-02-06 11:30:00	-6.88575	-7.04168	-3.82841	-4.04581
2017-02-06 12:00:00	-9.07851	-4.0159	-1.8179	-1.49594
2017-02-06 12:30:00	-9.39922	0.534761	-1.44304	2.57551
2017-02-06 13:00:00	-10.9433	1.0242	-8.95687	2.38861
2017-02-06 13:30:00	-11.984	-1.78775	-6.9759	0.133801
2017-02-06 14:00:00	-11.3874	-3.54509	-5.78633	-3.83275
2017-02-06 14:30:00	-11.2626	-4.02807	-6.61086	-7.68415
2017-02-06 15:00:00	-9.76195	-7.97009	-1.86925	-6.46108
2017-02-06 15:30:00	-7.64552	-7.9218	-4.63599	-8.77909
2017-02-06 16:00:00	-6.69087	-7.50659	-1.20323	-8.8612
2017-02-06 16:30:00	-5.24134	-6.78312	-0.0268507	-1.78881
2017-02-06 17:00:00	1.95465	-5.06254	-2.75955	0.453491
2017-02-06 17:30:00	4.85447	-2.85268	20.5571	2.85923
2017-02-06 18:00:00	7.61732	-8.72055	4.25215	-3.15616
2017-02-06 18:30:00	6.84564	-1.15071	-5.9468	-8.54452
2017-02-06 19:00:00	13.1109	1.68652	2.75746	7.65421
2017-02-06 19:30:00	18.1901	0.525467	8.17968	-9.12352
2017-02-06 20:00:00	18.7179	-0.900703	50.1996	16.5832
2017-02-06 20:30:00	15.0778	1.18112	2.04417	15.9845
2017-02-06 21:00:00	14.1975	1.26805	-9.0451	14.4444
2017-02-06 21:30:00	8.40576	0.97646	-37.1912	9.12834
2017-02-06 22:00:00	13.8641	3.52008	23.0599	10.2219
2017-02-06 22:30:00	23.2465	6.47939	3.36661	6.65196
2017-02-06 23:00:00	33.8024	6.54985	-2.31416	4.37548
2017-02-06 23:30:00	29.2804	7.71364	-17.9051	15.4641
2017-02-07	23.0187	3.57401	20.6783	18.2764
2017-02-07 00:30:00	15.8593	20.0747	9.42521	21.0471
2017-02-07 01:00:00	18.9854	16.6684	-1.41466	17.5357
2017-02-07 01:30:00	28.5186	15.6081	22.4665	19.1136
2017-02-07 02:00:00	23.1955	23.0668	-16.0891	10.2679
2017-02-07 02:30:00	28.7634	22.7821	0.640285	9.66044
2017-02-07 03:00:00	21.505	14.6207	3.78123	20.971
2017-02-07 03:30:00	27.8513	4.53173	-6.21071	8.08123
2017-02-07 04:00:00	23.3456	6.14259	13.3549	15.9058
2017-02-07 04:30:00	21.3027	2.49639	16.5667	14.1115
2017-02-07 05:00:00	20.44	12.2054	-12.6808	9.60625
2017-02-07 05:30:00	9.58688	8.52214	-32.3453	7.39221
2017-02-07 06:00:00	11.7931	24.8452	4.99232	10.5348
2017-02-07 06:30:00	14.9392	16.6038	22.3184	9.71471
2017-02-07 07:00:00	17.6273	15.9924	1.62138	7.40119
2017-02-07 07:30:00	15.0938	11.8973	3.68015	12.045
2017-02-07 08:00:00	7.77212	3.173	-32.6384	3.60861
2017-02-07 08:30:00	10.7657	6.29081	-3.07716	0.930388
2017-02-07 09:00:00	9.40263	14.8618	-5.50431	5.52757
2017-02-07 09:30:00	17.3897	13.9274	6.17702	-0.818521
2017-02-07 10:00:00	9.44295	8.22072	-14.8234	4.9438
2017-02-07 10:30:00	3.32248	3.61112	9.62033	-8.88609
2017-02-07 11:00:00	11.7689	7.68711	2.55751	-0.890313
2017-02-07 11:30:00	10.3102	16.6015	9.92489	-9.46631
2017-02-07 12:00:00	9.08871	7.46261	3.97011	-2.89946
2017-02-07 12:30:00	0.472998	5.13692	-4.01856	0.183784
2017-02-07 13:00:00	-6.07917	4.48606	-2.70376	1.74637
2017-02-07 13:30:00	-3.4584	2.76877	-30.5685	-14.7774
2017-02-07 14:00:00	-0.460974	1.43987	-3.69365	-54.0732
2017-02-07 14:30:00	-1.75032	-0.715921	-2.29796	0.678829
2017-02-07 15:00:00	-2.46455	2.60614	1.94189	-25.1118
2017-02-07 15:30:00	0.241357	3.35023	10.2411	-67.0561
2017-02-07 16:00:00	5.89155	7.64403	4.48808	2.75507
2017-02-07 16:30:00	-3.04649	1.38422	3.62215	-1.06455
2017-02-07 17:00:00	1.65086	2.84003	8.50236	0.0257576
2017-02-07 17:30:00	0.233929	6.72582	7.7884	0.211161
2017-02-07 18:00:00	-1.06308	-1.16351	21.27	7.60063
2017-02-07 18:30:00	1.13494	0.256196	25.7571	-0.959445
2017-02-07 19:00:00	-0.423861	0.455859	0.513007	3.93359
2017-02-07 19:30:00	-2.41102	4.06096	2.04111	10.2613
2017-02-07 20:00:00	3.00041	12.722	57.3141	-10.1893
2017-02-07 20:30:00	-6.72175	6.91232	48.7533	-2.43887
2017-02-07 21:00:00	-1.3464	7.35089	40.4729	-20.1319
2017-02-07 21:30:00	4.20918	1.98267	32.9986	4.80797
2017-02-07 22:00:00	3.87293	3.33674	39.7511	-14.4439
2017-02-07 22:30:00	-1.18357	15.3498	44.4924	-1.16155
2017-02-07 23:00:00	2.22696	4.01865	40.7823	2.8128
2017-02-07 23:30:00	8.13444	2.99897	38.3464	1.01792
2017-02-08	11.0792	1.31826	33.5273	2.39832
2017-02-08 00:30:00	11.9008	2.3693	46.6482	3.31465
2017-02-08 01:00:00	3.03374	-0.156781	39.9177	1.4066
2017-02-08 01:30:00	22.7101	-6.39859	42.8516	5.08003
2017-02-08 02:00:00	15.293	14.2101	49.1937	4.18183
2017-02-08 02:30:00	14.1483	24.4115	33.3517	2.42937
2017-02-08 03:00:00	14.3639	30.7353	12.22	0.667816
2017-02-08 03:30:00	17.9893	17.256	8.39031	0.845734
2017-02-08 04:00:00	33.5499	23.1789	-2.466	8.15373
2017-02-08 04:30:00	49.5894	14.2958	19.1662	1.73703
2017-02-08 05:00:00	25.2863	11.0039	13.1326	0.369995
2017-02-08 05:30:00	29.5017	16.5365	21.6029	3.42629
2017-02-08 06:00:00	25.7387	12.6655	18.0493	-0.382046
2017-02-08 06:30:00	27.7613	21.438	8.53709	-0.646749
2017-02-08 07:00:00	15.7352	13.8526	10.1659	-1.58094
2017-02-08 07:30:00	18.9659	-2.8791	21.1162	4.64871
2017-02-08 08:00:00	23.628	27.0059	23.8325	-0.449701
2017-02-08 08:30:00	2.4217	29.5535	35.2608	5.53804
2017-02-08 09:00:00	12.1096	14.6607	44	-6.28123
2017-02-08 09:30:00	11.2858	17.6086	31.959	-2.97024
2017-02-08 10:00:00	25.3173	23.9466	40.3013	2.39786
2017-02-08 10:30:00	7.89129	6.89732	28.1399	-17.1413
2017-02-08 11:00:00	21.5567	4.25145	17.9844	17.1683
2017-02-08 11:30:00	8.79631	-4.01052	12.2852	-5.196
2017-02-08 12:00:00	7.05309	5.49689	23.3292	-2.62115
2017-02-08 12:30:00	31.0444	-38.4836	24.0086	17.2079
2017-02-08 13:00:00	18.6972	-10.3517	3.92001	2.38702
2017-02-08 13:30:00	11.609	-0.746278	12.2498	8.06765
2017-02-08 14:00:00	8.36832	2.04916	7.21668	0.454622
2017-02-08 14:30:00	23.5446	-7.0231	4.31559	6.05445
2017-02-08 15:00:00	16.81	-3.87312	6.219	-5.06551
2017-02-08 15:30:00	11.1769	-3.003	9.75018	-0.0517454
2017-02-08 16:00:00	11.3357	-8.19746	3.11571	4.07231
2017-02-08 16:30:00	15.8446	-8.68634	-0.119979	15.1427
2017-02-08 17:00:00	14.6731	7.03158	5.59786	6.20791
2017-02-08 17:30:00	14.5759	11.8967	12.1263	0.815997
2017-02-08 18:00:00	18.7286	6.15555	8.38035	3.22547
2017-02-08 18:30:00	21.5332	2.97806	40.2864	1.51468
2017-02-08 19:00:00	25.3217	14.2318	32.5034	3.73558
2017-02-08 19:30:00	12.1182	15.1866	18.467	0.862783
2017-02-08 20:00:00	12.7482	15.9647	11.5638	2.00526
2017-02-08 20:30:00	10.1862	0.162954	17.3372	-0.963802
2017-02-08 21:00:00	11.2798	-2.92189	23.292	-3.96346
2017-02-08 21:30:00	-0.496924	1.7501	28.0586	3.4249
2017-02-08 22:00:00	6.57653	5.50638	33.5965	3.1171
2017-02-08 22:30:00	-27.4971	16.633	25.0161	1.52194
2017-02-08 23:00:00	4.04768	15.1857	20.2677	4.75787
2017-02-08 23:30:00	5.23988	0.544781	10.3369	16.2822
2017-02-09	6.45576	1.80422	11.2663	13.2468
2017-02-09 00:30:00	6.50785	7.32008	18.6508	13.6407
2017-02-09 01:00:00	9.88477	5.27212	6.6509	-1.35442
2017-02-09 01:30:00	0.069425	2.86856	14.4903	2.92351
2017-02-09 02:00:00	1.95276	3.72626	5.96089	2.58623
2017-02-09 02:30:00	11.009	2.7665	4.91826	3.18386
2017-02-09 03:00:00	12.7009	-2.05384	6.67263	1.10761
2017-02-09 03:30:00	5.89149	0.267562	7.6517	-3.35078
2017-02-09 04:00:00	0.83137	0.0828155	6.67949	-7.56091
2017-02-09 04:30:00	-0.585446	3.14878	8.98557	-7.67517
2017-02-09 05:00:00	-3.33299	-2.63459	-19.3032	-4.91219
2017-02-09 05:30:00	-9.8909	-3.27404	26.2377	3.59068
2017-02-09 06:00:00	-3.05804	-7.3303	-10.8596	2.49932
2017-02-09 06:30:00	0.133886	-6.97466	-7.34563	-0.491909
2017-02-09 07:00:00	0.130896	-8.95498	5.12297	1.101
2017-02-09 07:30:00	0.729881	-15.1901	-16.4874	0.0109023
2017-02-09 08:00:00	0.958899	-17.3387	-7.0548	-1.85135
2017-02-09 08:30:00	-1.37274	3.61297	-11.0213	2.99329
2017-02-09 09:00:00	-1.27045	-5.16312	-7.77276	1.92981
2017-02-09 09:30:00	0.973289	-4.73942	-11.8981	1.10516
2017-02-09 10:00:00	-2.43177	-9.50698	-6.18102	1.28442
2017-02-09 10:30:00	0.778834	-10.0247	0.423864	6.51024
2017-02-09 11:00:00	0.804661	-11.3708	-3.37949	3.62683
2017-02-09 11:30:00	2.56654	-10.0248	-2.62984	-10.5528
2017-02-09 12:00:00	-0.657092	-13.2827	-5.24539	23.3798
2017-02-09 12:30:00	-2.51851	-12.0416	-5.76677	-353.475
2017-02-09 13:00:00	14.3873	-6.26897	-9.42212	136.05
2017-02-09 13:30:00	-3.72677	-8.18656	-8.12604	59.8011
2017-02-09 14:00:00	-13.9533	-7.21942	-14.3302	100.953
2017-02-09 14:30:00	6.75911	-8.19431	-14.078	127.644
2017-02-09 15:00:00	15.0071	-8.41292	-12.1297	157.775
2017-02-09 15:30:00	15.6754	-3.6059	-7.83176	133.909
2017-02-09 16:00:00	-0.161311	-2.51085	-3.97486	81.6106
2017-02-09 16:30:00	9.31044	-3.61128	-5.76499	57.0452
2017-02-09 17:00:00	7.1209	-2.49556	-4.72408	86.4663
2017-02-09 17:30:00	8.9447	-1.77627	-0.927668	103.427
2017-02-09 18:00:00	7.40128	-4.19728	-2.49655	97.605
2017-02-09 18:30:00	51.8385	-3.61368	-0.734968	88.6288
2017-02-09 19:00:00	-13.4806	-2.09872	9.64273	88.2637
2017-02-09 19:30:00	2.79358	3.22867	5.20726	59.0586
2017-02-09 20:00:00	-13.8234	3.54068	48.099	72.6765
2017-02-09 20:30:00	49.2678	-2.77879	-25.5494	95.6931
2017-02-09 21:00:00	13.7194	12.2421	-1.62319	88.9665
2017-02-09 21:30:00	2.29445	12.0108	18.3175	70.4332
2017-02-09 22:00:00	-13.3923	7.89763	-25.0746	85.1412
2017-02-09 22:30:00	4.30199	25.8262	14.9468	85.5888
2017-02-09 23:00:00	17.9823	18.7776	15.6787	69.8738
2017-02-09 23:30:00	25.5569	28.4541	-1.76855	84.3558
2017-02-10	24.7755	9.26935	-6.82192	84.5467
2017-02-10 00:30:00	24.4194	4.74728	12.7714	84.736
2017-02-10 01:00:00	28.1593	6.43142	14.2193	106.516
2017-02-10 01:30:00	30.0896	3.03836	-5.33574	104.924
2017-02-10 02:00:00	25.7474	2.9221	-3.13775	77.9571
2017-02-10 02:30:00	19.3498	13.9665	-0.22572	116.632
2017-02-10 03:00:00	26.8201	-1.10114	12.966	129.761
2017-02-10 03:30:00	29.6729	1.70427	-1.17685	117.657
2017-02-10 04:00:00	34.8925	0.30402	-1.40044	127.117
2017-02-10 04:30:00	22.9973	7.54261	0.875045	102.478
2017-02-10 05:00:00	31.0595	2.31848	-2.83986	152.694
2017-02-10 05:30:00	23.7835	3.07989	-2.59364	144.64
2017-02-10 06:00:00	21.9925	-7.34104	-4.28072	141.165
2017-02-10 06:30:00	4.35797	2.55189	2.8837	141.341
2017-02-10 07:00:00	5.51562	1.19049	4.69247	143.525
2017-02-10 07:30:00	-18.9365	-12.5058	13.1149	151.008
2017-02-10 08:00:00	-99999	1.18021	15.289	168.909
2017-02-10 08:30:00	-99999	-1.84956	18.3207	130.743
2017-02-10 09:00:00	-99999	17.0926	-1.14659	133.819
2017-02-10 09:30:00	-99999	1.2143	-5.74693	146.333
2017-02-10 10:00:00	-99999	0.369731	0.01725	108.937
2017-02-10 10:30:00	14.8239	1.19956	-0.403069	65.571
2017-02-10 11:00:00	18.6221	-23.1921	14.7865	50.1001
2017-02-10 11:30:00	23.1459	-11.4502	-3.01348	41.0281
2017-02-10 12:00:00	-99999	-10.7798	-11.6079	76.8683
2017-02-10 12:30:00	56.8259	-0.937235	-2.62981	87.4163
2017-02-10 13:00:00	32.196	-10.5985	-10.4926	62.9029
2017-02-10 13:30:00	37.456	-7.87951	-6.27989	55.8783
2017-02-10 14:00:00	24.8039	-8.02557	-1.63289	53.923
2017-02-10 14:30:00	36.8085	-7.9436	8.63221	29.3954
2017-02-10 15:00:00	29.9272	-3.50517	0.532825	35.3514
2017-02-10 15:30:00	37.7515	-9.10736	-1.99977	13.4376
2017-02-10 16:00:00	35.9827	-4.95966	6.96273	-8.97659
2017-02-10 16:30:00	89.7865	-1.81675	8.41757	3.09264
2017-02-10 17:00:00	51.2233	-0.25201	14.5013	4.9755
2017-02-10 17:30:00	30.945	-5.99816	38.7797	28.6331
2017-02-10 18:00:00	32.2354	-8.9857	33.4048	63.5165
2017-02-10 18:30:00	21.3215	0.806934	95.3886	67.737
2017-02-10 19:00:00	18.4143	1.04009	181.999	72.6586
2017-02-10 19:30:00	6.816	0.768785	117.098	73.2055
2017-02-10 20:00:00	7.11471	-1.32922	174.375	58.5989
2017-02-10 20:30:00	14.4331	2.81243	126.457	66.0522
2017-02-10 21:00:00	-15.0188	2.9551	119.697	71.8831
2017-02-10 21:30:00	33.8079	-4.15808	55.995	51.041
2017-02-10 22:00:00	-34.7491	-0.286995	68.4616	57.2861
2017-02-10 22:30:00	4.97163	-4.43442	68.3289	48.4948
2017-02-10 23:00:00	8.19634	1.47697	83.3972	45.201
2017-02-10 23:30:00	11.5009	-103.583	114.331	42.6458
2017-02-11	12.5431	-88.5117	110.459	54.1012
2017-02-11 00:30:00	3.7792	26.3527	82.517	62.5075
2017-02-11 01:00:00	-0.0987265	43.2896	80.6459	71.401
2017-02-11 01:30:00	18.5954	43.1739	104.081	57.706
2017-02-11 02:00:00	24.1716	35.2443	83.3328	54.7795
2017-02-11 02:30:00	15.1821	28.8428	84.6734	68.7787
2017-02-11 03:00:00	40.9383	23.2708	87.6788	63.1781
2017-02-11 03:30:00	40.9297	-25.7444	62.7771	66.3507
2017-02-11 04:00:00	51.1259	34.6459	48.7695	63.5201
2017-02-11 04:30:00	55.5177	24.198	90.69	60.3663
2017-02-11 05:00:00	22.3955	19.8334	3.1251	49.8427
2017-02-11 05:30:00	22.608	16.7262	-12.5644	50.4064
2017-02-11 06:00:00	22.1925	14.943	12.0811	44.5284
2017-02-11 06:30:00	16.2033	18.513	9.44544	38.0064
2017-02-11 07:00:00	10.5455	16.2053	49.52	86.0611
2017-02-11 07:30:00	11.8198	15.4451	-20.7074	15.0696
2017-02-11 08:00:00	14.1881	20.6058	18.3407	7.24949
2017-02-11 08:30:00	35.1753	7.07378	18.2415	4.79651
2017-02-11 09:00:00	33.3285	4.41827	30.9402	9.23381
2017-02-11 09:30:00	16.4891	4.48533	17.4297	7.72037
2017-02-11 10:00:00	2.12214	3.83051	21.6012	4.13452
2017-02-11 10:30:00	25.1744	8.33683	25.1228	7.585
2017-02-11 11:00:00	42.3964	17.2713	27.0644	1.54702
2017-02-11 11:30:00	15.1738	14.3032	23.8538	-17.6051
2017-02-11 12:00:00	22.1556	17.7852	22.7313	-55.8419
2017-02-11 12:30:00	23.0399	12.7238	23.3443	-63.9562
2017-02-11 13:00:00	34.668	8.19182	20.6922	-77.7347
2017-02-11 13:30:00	43.5914	6.55383	16.2081	-79.0572
2017-02-11 14:00:00	63.3147	7.54857	18.7753	-83.708
2017-02-11 14:30:00	91.4042	8.27982	19.9679	-83.6113
2017-02-11 15:00:00	86.0529	6.03236	19.4252	-76.8172
[truncated: 2,369 more rows]

[truncated: 8 more sheets: Fig. 7c, Fig. 7d, Fig. 7e, Fig. 7f, Fig. 9b, Fig. 9c, FIG. 9e, Fig. 9f]
